# Supplementary material for: Synthesis and photophysical properties of novel bis-quinolin-3-yl-chalcones
Source: Royal Society of Chemistry journal article supplement (doi:10.1039/d4ra04335a), 2024-01-01

## Supplementary Data

### Synthesis, characterization, and photophysical activity of novel *bis*-quinolin-3yl-chalcones promoted by visible light.

Indhu Chandrasekaran<sup>a</sup>, Sarveswari s<sup>\*a</sup>

<sup>a</sup>*Department of Chemistry, School of Advanced Sciences, VIT University, Vellore  
632014, Tamil Nadu, India.*

#### TABLE OF CONTENTS

|                                                                                  |    |
|----------------------------------------------------------------------------------|----|
| 1. Spectral data of compounds (17-36)                                            | 02 |
| 2. NMR spectra ( <sup>1</sup> H, <sup>13</sup> C, DEPT-135) of compounds (17-36) | 09 |
| 3. HRMS spectra of compounds (17-36)                                             | 39 |
| 4. NMR spectra of compounds 3-6 & 12-16                                          | 49 |
| 5. Solvatochromism of compounds (17-36)                                          | 58 |
| 6. Optimised geometry of compounds (17-36)                                       | 60 |
| 7. Frontier molecular orbitals of compounds (17-36)                              | 61 |

### 1. The spectral characteristics of the synthesized compounds (17-36)

The spectral data of the synthesized novel bisquinoline chalcones (17-36) are listed below

1.1 (*E*)-1-(6-chloro-2-methyl-4-phenylquinolin-3-yl)-3-(2-morpholinoquinolin-3-yl)prop-2-en-1-one (17): Yellow solid (Obtained yield: 467 mg, 90% yield); m.p.: 168°C ; <sup>1</sup>H NMR (400 MHz, CDCl<sub>3</sub>, δ(ppm)): 8.02 (d, *J* = -8.92 Hz, 1H), 7.73 (d, *J* = -8.68 Hz, 2H), 7.63 (d, *J* = -8.84 Hz, 1H), 7.55 (dd, *J* = -7.52, -14.02 Hz, 3H), 7.35 (s, 3H), 7.30 (d, *J* = -7.60 Hz, 1H), 7.23 (t, *J* = -6.96 Hz, 3H), 3.09 (d, *J* = -16.16 Hz, 1H), 3.60 (s, 4H), 3.09 (s, 4H), 2.65 (s, 3H); <sup>13</sup>C NMR (100 MHz, CDCl<sub>3</sub>, δ (ppm)): 196.75, 159.02, 155.05, 147.76, 143.39, 138.02, 134.68, 133.39, 132.70, 131.23, 130.96, 130.67, 128.95, 128.95, 128.64, 128.46, 127.86, 127.66, 125.98, 124.75, 121.60, 66.59, 50.84, 23.91; DEPT-135 (100 MHz, CDCl<sub>3</sub>, δ (ppm))(+ve peaks): 145.89, 137.98, 131.03, 130.83, 130.35, 130.21, 129.55, 128.98, 127.82, 127.48, 126.49, 123.69, 123.30, 122.87, 24.42, (-ve peaks): 50.71, 25.66; HRMS(ESI)m/z: [M+H]<sup>+</sup> + Calculated for C<sub>32</sub>H<sub>26</sub>ClN<sub>3</sub>O<sub>2</sub>; 520.1792; found: 520.1794.

1.2 (*E*)-1-(2-methyl-4-phenylquinolin-3-yl)-3-(2-morpholinoquinolin-3-yl)prop-2-en-1-one (18): Light yellow solid (Obtained yield: 446 mg, 92% yield); m.p.: 158°C ; <sup>1</sup>H NMR (400 MHz, CDCl<sub>3</sub>, δ(ppm)): 8.15 (d, *J* = -8.48 Hz, 1H), 7.80 (d, *J* = -7.88 Hz, 3H), 7.63 (dd, *J* = -3.72, -13.46 Hz, 3H), 7.48 (t, *J* = -7.40 Hz, 1H), 7.41 (d, *J* = -6.32 Hz, 2H), 7.34 (dd, *J* = -5.84, -13.62 Hz, 4H), 7.26 (s, 1H), 6.75 (d, *J* = -16.16 Hz, 1H), 3.66 (t, *J* = -4.32 Hz, 4H), 3.16 (t, *J* = -4.52 Hz, 4H), 2.74 (s, 3H); <sup>13</sup>C NMR (100 MHz, CDCl<sub>3</sub>, δ (ppm)): 197.35, 159.04, 154.65, 147.84, 147.70, 145.40, 143.25, 138.02, 135.38, 132.59, 130.90, 130.30, 129.04, 128.82, 128.64, 128.44, 127.88, 127.64, 126.70, 126.22, 125.13, 124.89, 124.77, 121.72, 66.59, 50.80, 24.02; DEPT-135 (100 MHz, CDCl<sub>3</sub>, δ (ppm)) (+ve peaks): 143.26, 138.03, 130.90, 130.36, 130.29, 129.04, 128.83, 128.65, 128.44, 127.88, 127.64, 126.71, 126.22, 124.89, 24.03, (-ve peaks): 66.59, 50.80; HRMS(ESI)m/z: [M+H]<sup>+</sup> + Calculated for C<sub>32</sub>H<sub>27</sub>N<sub>3</sub>O<sub>2</sub>; 486.2182; found: 486.2187.

1.3 (*E*)-1-(6-chloro-4-(2-chlorophenyl)-2-methylquinolin-3-yl)-3-(2-morpholinoquinolin-3-yl)prop-2-en-1-one (19): Yellow solid (Obtained yield: 498 mg, 90% yield); m.p.: 160°C ; <sup>1</sup>H NMR (400 MHz, CDCl<sub>3</sub>, δ(ppm)): 8.10 (d, *J* = -9.00 Hz, 1H), 7.92 (s, 1H), 7.81 (d, *J* = -8.36 Hz, 1H), 7.71 (dd, *J* = -2.28, -9.00 Hz, 1H), 7.67 (d, *J* = -7.52 Hz, 1H), 7.64 (dd, *J* = -4.88, -10.10 Hz, 1H), 7.50 (d, *J* = -16.28 Hz, 1H), 7.41 (ddd, *J* = -1.60, -4.56, Hz, 2H), 7.37 (dd, *J* = -1.20, -7.16 Hz, 2H), 7.32 (d, *J* = -2.20 Hz, 1H), 7.26 (s, 1H), 6.90 (d, *J* = -16.28 Hz, 1H), 3.66 (t, *J* = -4.40 Hz, 4H), 3.19 (t, *J* = -4.80 Hz, 4H), 2.74 (s, 3H); <sup>13</sup>C NMR (100 MHz, CDCl<sub>3</sub>, δ (ppm)): 196.34, 159.17, 155.14, 147.83, 145.87, 144.16, 141.89, 138.28, 133.79, 133.48, 133.31, 132.94, 132.39, 131.38, 131.08, 130.79, 130.62, 129.78, 127.98, 127.67, 127.22, 125.45, 124.96, 124.82, 124.68,

121.42, 66.60, 50.90, 23.90; **DEPT-135** (100 MHz, CDCl<sub>3</sub>, δ (ppm))(+ve peaks): 144.17, 138.29, 132.39, 131.38, 131.08, 130.79, 130.63, 129.78, 127.99, 127.67, 127.22, 124.97, 124.68, 23.91, (-ve peaks): 66.60, 50.90; **HRMS**(ESI)m/z: [M+H]<sup>+</sup> Calculated for C<sub>32</sub>H<sub>25</sub>Cl<sub>2</sub>N<sub>3</sub>O<sub>2</sub>; 554.1402; found: 554.1408.

**1.4 (E)-1-(6-chloro-4-(2-fluorophenyl)-2-methylquinolin-3-yl)-3-(2-morpholinoquinolin-3-yl)prop-2-en-1-one (20):** Yellow solid (Obtained yield: 483 mg, 90% yield); m.p.:162° C ; **<sup>1</sup>H NMR** (400 MHz, CDCl<sub>3</sub>, δ(ppm)): 8.02 (d, *J* = -8.96 Hz, 1H), 7.84 (s, 1H), 7.74 (d, *J* = -8.36 Hz, 1H), 7.64 (dd, *J* = -2.16, -8.98 Hz, 1H), 7.58 (dd, *J* = -3.96, -7.46 Hz, 2H), 7.34 (dd, *J* = -2.04, -7.02 Hz, 2H), 7.29 (d, *J* = -5.24 Hz, 1H), 7.18 (dd, *J* = -8.00, -13.84 Hz, 3H), 7.17 (d, *J* = -13.80 Hz, 1H), 7.03 (t, *J* = -9.04 Hz, 1H), 6.80 (d, *J* = -16.32 Hz, 1H), 3.56 (t, *J* = -4.52 Hz, 4H), 3.10 (dd, *J* = -3.76, -8.38 Hz, 4H), 2.65 (s, 3H); **<sup>13</sup>C NMR** (100 MHz, CDCl<sub>3</sub>, δ (ppm)): 196.52, 159.14, 155.03, 147.84, 145.89, 144.28, 139.07, 138.25, 134.06, 132.99, 132.32, 131.44, 131.11, 130.75, 128.04, 127.97, 127.67, 125.88, 124.79, 124.68, 124.54, 122.17, 121.42, 115.94, 115.72; **DEPT-135** (100 MHz, CDCl<sub>3</sub>, δ (ppm))(+ve peaks): 144.29, 138.25, 132.30, 131.45, 131.11, 130.75, 128.04, 127.98, 127.67, 124.99, 124.54, 115.94, 115.72, 23.90; (-ve peaks): 66.55, 50.86; **HRMS**(ESI)m/z: [M+H]<sup>+</sup> Calculated for C<sub>32</sub>H<sub>25</sub>ClFN<sub>3</sub>O<sub>2</sub>; 538.1697; found: 538.1696.

**1.5 (E)-1-(2-methyl-6-nitro-4-phenylquinolin-3-yl)-3-(2-morpholinoquinolin-3-yl)prop-2-en-1-one (21):** Yellowish orange solid (Obtained yield: 466 mg, 88% yield); m.p.: 161° C; **<sup>1</sup>H NMR** (400 MHz, CDCl<sub>3</sub>, δ(ppm)): 8.52 (d, *J* = -2.36 Hz, 1H), 8.46 (dd, *J* = -2.44, -9.22 Hz, 1H), 8.20 (d, *J* = -9.16 Hz, 1H), 7.73 (d, *J* = -9.48 Hz, 2H), 7.57 (dd, *J* = -4.44, -7.44 Hz, 2H), 7.40 (t, *J* = -3.36 Hz, 3H), 7.29 (ddd, *J* = -2.04, -8.98, Hz, 4H), 6.69 (d, *J* = -16.16 Hz, 1H), 3.61 (t, *J* = -4.44 Hz, 4H), 3.09 (t, *J* = -4.64 Hz, 4H), 2.71 (s, 3H); **<sup>13</sup>C NMR** (100 MHz, CDCl<sub>3</sub>, δ (ppm)): 196.01, 159.06, 159.01, 149.83, 147.81, 147.03, 145.77, 143.72, 138.18, 134.31, 133.84, 131.12, 130.93, 130.15, 129.56, 128.97, 127.96, 127.90, 127.69, 125.03, 124.71, 124.48, 123.81, 123.25, 121.41, 66.61, 50.86, 24.40; **DEPT-135** (100 MHz, CDCl<sub>3</sub>, δ (ppm))(+ve peaks): 143.43, 141.24, 137.95, 136.51, 129.52, 129.27, 127.87, 127.73, 127.63, 123.60, 123.18, 29.70, (-ve peaks): 52.78, 31.71 ; **HRMS**(ESI)m/z: [M+H]<sup>+</sup> Calculated for C<sub>32</sub>H<sub>26</sub>N<sub>4</sub>O<sub>4</sub>; 531.2032; found: 531.2042.

**1.6 (E)-1-(6-chloro-2-methyl-4-phenylquinolin-3-yl)-3-(2-(piperidin-1-yl)quinolin-3-yl)prop-2-en-1-one (22):** orange solid (Obtained yield: 465 mg, 90% yield); m.p.: 139° C; **<sup>1</sup>H NMR** (400 MHz, CDCl<sub>3</sub>, δ(ppm)) 8.00 (d, *J* = -8.96 Hz, 1H), 7.69 (t, *J* = -3.04 Hz, 2H), 7.61 (dd, *J* = -1.08, -8.94 Hz, 1H), 7.51 (dd, *J* = -7.08, -9.08 Hz, 3H), 7.33 (t, *J* = -3.68 Hz, 3H), 7.24 (t, *J* = -2.48 Hz, 2H), 7.20 (dd, *J* = -1.76, -9.48 Hz, 2H), 6.64 (d, *J* = -16.24 Hz, 1H), 3.04 (s, 4H), 2.66 (s, 3H), 1.42 (s, 6H); **<sup>13</sup>C NMR** (100 MHz, CDCl<sub>3</sub>, δ (ppm)): 197.15 160.16 155.20 148.01 146.21 144.61 144.42 137.44 134.66 133.47 132.52 131.05 130.73 130.64 130.12 128.86 128.60 128.10 127.85 127.48 126.08 125.01 124.50 124.41 121.99 51.69 25.79 24.42 23.92; **DEPT-135** (100 MHz, CDCl<sub>3</sub>, δ (ppm)) (+ve peaks): 144.42, 137.45, 131.05, 130.73, 130.64, 130.12, 128.86,

128.60, 128.10, 127.85, 127.49, 125.01, 124.41, 23.93, (-ve peaks): 51.69, 25.79, 24.42; **HRMS**(ESI)m/z: [M+H]<sup>+</sup> + Calculated for C<sub>33</sub>H<sub>28</sub>ClN<sub>3</sub>O; 518.1999; found: 518.1997.

**1.7 (E)-1-(2-methyl-4-phenylquinolin-3-yl)-3-(2-(piperidin-1-yl)quinolin-3-yl)prop-2-en-1-one (23):** orange solid (Obtained yield: 445 mg, 92% yield); m.p.:142 °C ; **<sup>1</sup>H NMR** (400 MHz, CDCl<sub>3</sub>, δ(ppm)): 8.09 (d, *J* = -9.00 Hz, 1H), 7.86 (s, 1H), 7.78 (d, *J* = -8.32 Hz, 1H), 7.71 (dd, *J* = -2.16, -8.96 Hz, 1H), 7.61 (dd, *J* = -7.96, -11.56 Hz, 2H), 7.41 (t, *J* = -6.80 Hz, 2H), 7.33 (t, *J* = -8.68 Hz, 3H), 7.25 (dd, *J* = -5.52, -6.92 Hz, 3H), 7.09 (t, *J* = -9.04 Hz, 1H), 6.85 (d, *J* = -16.32 Hz, 1H), 3.14 (dd, *J* = -5.68, -11.52 Hz, 4H), 2.74 (s, 3H), 1.48 (d, *J* = -5.44 Hz, 6H); **<sup>13</sup>C NMR** (100 MHz, CDCl<sub>3</sub>, δ (ppm)): 196.81, 160.21, 155.23, 148.05, 145.85, 145.29, 139.13, 137.84, 134.20, 132.86, 132.15, 131.30, 130.88, 130.64, 127.94, 127.64, 127.44, 125.97, 124.59, 124.49, 124.44, 121.86, 115.95, 115.74, 51.68, 25.70, 24.41, 23.86; **DEPT-135** (100 MHz, CDCl<sub>3</sub>, δ (ppm)) (+ve peaks): 145.29, 137.85, 132.15, 132.13, 131.30, 130.88, 130.64, 127.94, 127.64, 127.44, 124.59, 124.44, 115.95, 115.74, 23.86, (-ve peaks): 51.68, 25.70, 24.41; **HRMS**(ESI)m/z: [M+H]<sup>+</sup> + Calculated for C<sub>33</sub>H<sub>29</sub>N<sub>3</sub>O; 484.2388; found:484.2380.

**1.8 (E)-1-(6-chloro-4-(2-chlorophenyl)-2-methylquinolin-3-yl)-3-(2-(piperidin-1-yl)quinolin-3-yl)prop-2-en-1-one (24):** orange solid (Obtained yield: 496 mg, 90% yield); m.p.:154 °C; **<sup>1</sup>H NMR** (400 MHz, CDCl<sub>3</sub>, δ(ppm)): 8.02 (d, *J* = -8.96 Hz, 2H), 7.80 (d, *J* = -8.40 Hz, 1H), 7.63 (d, *J* = -2.24 Hz, 1H), 7.61 (t, *J* = -2.28 Hz, 1H), 7.56 (dd, *J* = -4.76, -14.16 Hz, 1H), 7.34 (t, *J* = -7.60 Hz, 3H), 7.29 (s, 1H), 7.25 (d, *J* = -2.40 Hz, 2H), 7.19 (s, 1H), 6.39 (s, 1H), 2.98 (s, 4H), 2.67 (s, 3H), 1.48 (d, *J* = -3.16 Hz, 6H); **<sup>13</sup>C NMR** (100 MHz, CDCl<sub>3</sub>, δ (ppm)): 193.26, 157.87, 155.65, 150.60, 146.47, 145.85, 142.08, 140.40, 133.55, 133.13, 132.96, 132.84, 132.35, 131.24, 130.70, 130.49, 130.22, 129.68, 128.05, 127.67, 127.18, 125.98, 125.92, 125.38, 124.79, 123.24, 52.13, 24.93, 23.81, 23.74; **DEPT-135** (100 MHz, CDCl<sub>3</sub>, δ (ppm)) (+ve peaks): 130.70, 130.49, 130.22, 129.68, 128.05, 127.68, 127.19, 125.92, 124.79, 23.82, (-ve peaks): 52.13, 24.93, 23.74; **HRMS**(ESI)m/z: [M+H]<sup>+</sup> + Calculated for C<sub>33</sub>H<sub>27</sub>Cl<sub>2</sub>N<sub>3</sub>O; 552.1609; found:552.1603.

**1.9 (E)-1-(6-chloro-4-(2-fluorophenyl)-2-methylquinolin-3-yl)-3-(2-(piperidin-1-yl)quinolin-3-yl)prop-2-en-1-one (25):** orange solid (Obtained yield: 482 mg, 90% yield); m.p.:145 °C; **<sup>1</sup>H NMR** (400 MHz, CDCl<sub>3</sub>, δ(ppm)): 8.06 (d, *J* = -8.36 Hz, 1H), 7.68 (dd, *J* = -6.86, -11.37 Hz, 3H), 7.56 (d, *J* = -8.52 Hz, 1H), 7.52 (dd, *J* = -1.96, -12.06 Hz, 2H), 7.40 (dd, *J* = -0.72, -11.18 Hz, 1H), 7.32 (dd, *J* = -1.64, -5.16 Hz, 2H), 7.25 (dd, *J* = -3.16, -7.00 Hz, 2H), 7.20 (d, *J* = -11.00 Hz, 1H), 6.65 (d, *J* = -16.20 Hz, 1H), 3.05 (s, 4H), 2.68 (s, 3H), 1.42 (s, 6H); **<sup>13</sup>C NMR** (100 MHz, CDCl<sub>3</sub>, δ (ppm)): 197.60, 160.18, 154.79, 147.94, 147.70, 145.58, 144.27, 137.46, 135.32, 132.71, 130.68, 130.33, 130.22, 128.83, 128.58, 128.52, 128.40, 128.24, 127.86, 127.42, 126.61, 126.27, 125.26, 124.50, 124.38, 122.14, 51.66, 25.76, 24.42, 23.86; **DEPT-135** (100 MHz, CDCl<sub>3</sub>, δ (ppm)) (+ve peaks): 144.27, 137.46, 130.68, 130.23, 128.83, 128.59, 128.40, 127.86, 127.42, 126.61,

126.28, 124.38, 23.87, (-ve peaks): 51.67, 25.77, 24.42; **HRMS**(ESI)m/z: [M+H]<sup>+</sup> + Calculated for C<sub>33</sub>H<sub>27</sub>ClFN<sub>3</sub>O; 536.1904; found: 536.1169.

**1.10 (E)-1-(2-methyl-6-nitro-4-phenylquinolin-3-yl)-3-(2-(piperidin-1-yl)quinolin-3-yl)prop-2-en-1-one (26):** orange solid (Obtained yield: 465 mg, 88% yield); m.p: 150 °C; **<sup>1</sup>H NMR** (400 MHz, CDCl<sub>3</sub>, δ(ppm)): 8.59 (d, *J* = -2.16 Hz, 1H), 8.53 (dd, *J* = -2.36, -9.14 Hz, 1H), 8.27 (d, *J* = -9.20 Hz, 1H), 7.78 (d, *J* = -7.04 Hz, 2H), 7.61 (t, *J* = -7.84 Hz, 3H), 7.47 (t, *J* = -3.08 Hz, 3H), 7.33 (dd, *J* = -2.56, -11.44 Hz, 3H), 6.74 (d, *J* = -16.24 Hz, 1H), 3.12 (s, 4H), 2.80 (s, 3H), 1.64 (s, 6H); **<sup>13</sup>C NMR** (100 MHz, CDCl<sub>3</sub>, δ (ppm)): 196.38, 160.14, 159.20, 149.80, 148.06, 147.13, 145.71, 144.76, 137.60, 134.39, 133.78, 130.91, 130.83, 130.08, 129.49, 128.91, 127.89, 127.63, 127.49, 124.53, 124.46, 123.68, 123.30, 121.78, 51.73, 25.82, 24.39, 24.36; **DEPT-135** (100 MHz, CDCl<sub>3</sub>, δ (ppm)) (+ve peaks): 144.76, 137.60, 130.91, 130.83, 130.08, 129.49, 128.92, 127.90, 127.63, 127.49, 124.53, 123.69, 123.30, 24.36, (-ve peaks): 51.73, 25.82, 24.39; **HRMS**(ESI)m/z: [M+H]<sup>+</sup> + Calculated for C<sub>33</sub>H<sub>28</sub>N<sub>4</sub>O<sub>3</sub>; 529.2240; found: 529.2249.

**1.11 (E)-1-(6-chloro-2-methyl-4-phenylquinolin-3-yl)-3-(2-(pyrrolidin-1-yl)quinolin-3-yl)prop-2-en-1-one (27):** Yellow solid (Obtained yield: 453 mg, 90% yield); m.p: 178 °C ; **<sup>1</sup>H NMR** (400 MHz, CDCl<sub>3</sub>, δ(ppm)): 7.98 (d, *J* = -8.96 Hz, 1H), 7.60 (dd, *J* = -2.32, -8.98 Hz, 2H), 7.51 (d, *J* = -2.24 Hz, 1H), 7.49 (s, 1H), 7.45 (dd, *J* = -1.28, -6.92 Hz, 1H), 7.41 (d, *J* = -9.64 Hz, 1H), 7.36 (dd, *J* = -2.16, -4.56 Hz, 4H), 7.24 (dd, *J* = -4.04, -6.46 Hz, 2H), 7.11 (dd, *J* = -0.88, -11.06 Hz, 1H), 6.35 (d, *J* = -15.88 Hz, 1H), 3.31 (t, *J* = -6.52 Hz, 4H), 2.65 (s, 3H), 1.77 (t, *J* = -6.52 Hz, 4H); **<sup>13</sup>C NMR** (100 MHz, CDCl<sub>3</sub>, δ (ppm)): 196.62, 156.08, 155.25, 146.18, 145.69, 144.51, 137.83, 134.63, 133.50, 132.56, 131.11, 130.88, 130.62, 130.21, 128.93, 128.68, 127.98, 127.80, 126.49, 126.03, 125.04, 123.13, 122.77, 119.84, 50.66, 25.66, 24.00; **DEPT-135** (100 MHz, CDCl<sub>3</sub>, δ (ppm)) (+ve peaks): 145.69, 137.83, 131.12, 130.89, 130.62, 130.21, 128.94, 128.68, 127.98, 127.81, 126.49, 125.04, 122.77, 24.00, (-ve peaks): 50.66 25.66; **HRMS**(ESI)m/z: [M+H]<sup>+</sup> + Calculated for C<sub>32</sub>H<sub>26</sub>ClN<sub>3</sub>O; 504.1842; found: 504.1841.

**1.12 (E)-1-(2-methyl-4-phenylquinolin-3-yl)-3-(2-(pyrrolidin-1-yl)quinolin-3-yl)prop-2-en-1-one (28):** Yellow solid (Obtained yield: 432 mg, 92% yield); m.p: 182 °C ; **<sup>1</sup>H NMR** (400 MHz, CDCl<sub>3</sub>, δ(ppm)): 7.99 (d, *J* = -8.96 Hz, 1H), 7.62 (dd, *J* = -2.20, -8.90 Hz, 2H), 7.52 (d, *J* = -2.16 Hz, 1H), 7.51 (s, 1H), 7.46 (d, *J* = -7.64 Hz, 2H), 7.38 (dd, *J* = -13.32, -10.66 Hz, 4H), 7.24 (dd, *J* = -3.76, -16.36 Hz, 3H), 7.13 (t, *J* = -7.68 Hz, 1H), 6.37 (d, *J* = -15.88 Hz, 1H), 3.32 (t, *J* = -6.32 Hz, 4H), 2.66 (s, 3H), 1.78 (t, *J* = -6.40 Hz, 4H); **<sup>13</sup>C NMR** (100 MHz, CDCl<sub>3</sub>, δ (ppm)): 197.12, 156.09, 154.84, 147.79, 145.56, 145.39, 137.78, 135.33, 132.72, 130.81, 130.32, 130.25, 128.95, 128.62, 128.46, 128.37, 127.80, 126.61, 126.45, 126.30, 125.20, 123.15, 122.73, 119.99, 50.64, 25.65, 24.04; **DEPT-135** (100 MHz, CDCl<sub>3</sub>, δ (ppm)) (+ve peaks): 145.56, 137.79, 130.82,

130.44, 130.32, 130.26, 128.95, 128.63, 128.46, 128.37, 127.80, 126.62, 126.45, 126.30, 24.04, (-ve peaks): 50.65, 25.66; **HRMS**(ESI)m/z: [M+H]<sup>+</sup> + Calculated for C<sub>32</sub>H<sub>27</sub>N<sub>3</sub>O; 470.2232; found: 470.2233.

**1.13 (E)-1-(6-chloro-4-(2-chlorophenyl)-2-methylquinolin-3-yl)-3-(2-(pyrrolidin-1-yl)quinolin-3-yl)prop-2-en-1-one (29):** m.p:184 ° C ;Yellow solid (Obtained yield: 505 mg, 94% yield); **<sup>1</sup>H NMR** (400 MHz, CDCl<sub>3</sub>, δ(ppm)): 8.19 (s, 1H), 8.09 (d, *J* = -9.00 Hz, 1H), 7.76 (d, *J* = -8.36 Hz, 1H), 7.71 (dd, *J* = -2.28, -8.96 Hz, 1H), 7.63 (d, *J* = -7.76 Hz, 1H), 7.58 (ddd, *J* = -1.24, -6.94, Hz, 1H), 7.37 (dd, *J* = -4.20, -10.20 Hz, 3H), 7.32 (q, *J* = -2.48 Hz, 3H), 7.29 (s, 1H), 6.50 (s, 1H), 3.30 (t, *J* = -9.76 Hz, 4H), 2.74 (s, 3H), 1.83 (t, *J* = -5.48 Hz, 4H); **<sup>13</sup>C NMR** (100 MHz, CDCl<sub>3</sub>, δ (ppm)): 142.96, 137.97, 137.16, 134.24, 131.31, 130.98, 130.68, 130.61, 127.75, 126.55, 125.86, 124.68, 124.59, 122.73, 120.85, 50.84, 25.83, 25.65; **DEPT-135** (100 MHz, CDCl<sub>3</sub>, δ (ppm)) (+ve peaks): 142.95, 137.97, 137.16, 131.30, 130.68, 130.61, 127.86, 127.75, 127.66, 126.55, 125.86, 124.59, 122.78, 122.72, 23.92, (-ve peaks): 50.63, 25.83; **HRMS**(ESI)m/z: [M+H]<sup>+</sup> + Calculated for C<sub>32</sub>H<sub>25</sub>Cl<sub>2</sub>N<sub>3</sub>O; 538.1452; found:538.1453.

**1.14 (E)-1-(6-chloro-4-(2-fluorophenyl)-2-methylquinolin-3-yl)-3-(2-(pyrrolidin-1-yl)quinolin-3-yl)prop-2-en-1-one (30):** Yellow solid (Obtained yield: 469 mg, 90% yield); m.p:184 ° C ;**<sup>1</sup>H NMR** (400 MHz, CDCl<sub>3</sub>, δ(ppm)): 7.98 (d, *J* = -8.92 Hz, 1H), 7.60 (dd, *J* = -2.28, -8.98 Hz, 2H), 7.50 (t, *J* = -2.24 Hz, 2H), 7.43 (q, *J* = -5.72 Hz, 2H), 7.36 (dd, *J* = -1.96, -4.62 Hz, 3H), 7.24 (dd, *J* = -4.00, -6.48 Hz, 2H), 7.10 (t, *J* = -7.28 Hz, 1H), 6.35 (d, *J* = -15.88 Hz, 1H), 3.30 (t, *J* = -6.48 Hz, 4H), 2.65 (s, 3H), 1.76 (t, *J* = -6.52 Hz, 4H); **<sup>13</sup>C NMR** (100 MHz, CDCl<sub>3</sub>, δ (ppm)): 196.19, 160.57, 158.10, 155.24, 146.33, 145.87, 139.02, 138.04, 134.22, 132.90, 132.26, 132.24, 131.40, 131.32, 131.03, 130.68, 127.87, 127.69, 125.95, 124.60, 123.14, 122.81, 122.34, 122.18, 119.67, 115.99, 115.78, 50.68,25.66, 23.93; **DEPT-135** (100 MHz, CDCl<sub>3</sub>, δ (ppm)) (+ve peaks): 146.35, 138.03, 132.24, 131.41, 131.32, 131.03, 130.68, 127.87, 127.69, 124.69, 124.65, 124.60, 122.81, 23.93, (-ve peaks): 50.67 25.66; **HRMS**(ESI)m/z: [M+H]<sup>+</sup> + Calculated for C<sub>32</sub>H<sub>25</sub>ClFN<sub>3</sub>O; 522.1748; found:522.1747.

**1.15 (E)-1-(2-methyl-6-nitro-4-phenylquinolin-3-yl)-3-(2-(pyrrolidin-1-yl)quinolin-3-yl)prop-2-en-1-one (31):** Yellow solid (Obtained yield: 452 mg, 88% yield); m.p: 170 ° C; **<sup>1</sup>H NMR** (400 MHz, CDCl<sub>3</sub>, δ(ppm)): 8.60 (d, *J* = -2.40 Hz, 1H), 8.52 (dd, *J* = -2.44, -9.22 Hz, 1H), 8.25 (d, *J* = -9.20 Hz, 1H), 7.66 (d, *J* = -8.36 Hz, 1H), 7.59 (s, 1H), 7.53 (d, *J* = -7.20 Hz, 2H), 7.49 (dd, *J* = -3.28, -6.36 Hz, 3H), 7.36 (dd, *J* = -2.88, -6.50 Hz, 2H), 7.26 (s, 1H), 7.20 (t, *J* = -7.16 Hz, 1H), 6.45 (d, *J* = -15.84 Hz, 1H), 3.39 (t, *J* = -6.40 Hz, 4H), 2.80 (s, 3H), 1.86 (t, *J* = -6.44 Hz, 4H); **<sup>13</sup>C NMR** (100 MHz, CDCl<sub>3</sub>, δ (ppm)): 195.79, 159.24, 156.08, 149.81,

148.45, 146.96, 145.94, 145.71, 137.96, 134.47, 133.80, 131.03, 130.85, 130.20, 129.55, 127.82, 127.46, 126.53, 124.55, 123.71, 123.32, 123.11, 122.86, 119.64, 50.70, 25.66, 24.43; **DEPT-135** (100 MHz, CDCl<sub>3</sub>, δ (ppm)) (+ve peaks): 145.95, 137.96, 131.03, 130.85, 130.20, 129.55, 128.99, 127.83, 127.46, 126.53, 123.71, 123.32, 122.86, 24.44, (-ve peaks): 50.70, 25.67; **HRMS**(ESI)m/z: [M+H]<sup>+</sup> Calculated for C<sub>32</sub>H<sub>26</sub>N<sub>4</sub>O<sub>3</sub>; 515.2083; found: 515.2083.

1.16 (*E*)-1-(6-chloro-2-methyl-4-phenylquinolin-3-yl)-3-(2-thiomorpholinoquinolin-3-yl)prop-2-en-1-one (**32**): Yellow solid (Obtained yield: 492 mg, 92% yield); m.p.:135 °C ; **<sup>1</sup>H NMR** (400 MHz, CDCl<sub>3</sub>, δ(ppm)): 8.58 (dd, *J* = -2.08, -8.80 Hz, 1H), 8.47 (dd, *J* = -1.96, -9.18 Hz, 1H), 8.26 (d, *J* = -7.96 Hz, 1H), 8.19 (d, *J* = -9.16 Hz, 1H), 7.79 (d, *J* = -7.04 Hz, 2H), 7.59 (q, *J* = -2.32 Hz, 3H), 7.48 (t, *J* = -3.28 Hz, 2H), 7.37 (dd, *J* = -2.16, -5.48 Hz, 3H), 6.71 (d, *J* = -16.08 Hz, 1H), 2.80 (s, 4H), 2.74 (s, 4H), 2.02 (s, 3H); **<sup>13</sup>C NMR** (100 MHz, CDCl<sub>3</sub>, δ (ppm)): 195.75, 159.23, 156.03, 149.79, 146.95, 145.89, 145.70, 137.98, 134.47, 133.80, 131.03, 130.83, 130.21, 129.54, 128.98, 127.82, 127.48, 126.49, 124.54, 123.69, 123.29, 123.09, 122.87, 119.65, 50.71, 25.66, 24.42; **DEPT-135** (100 MHz, CDCl<sub>3</sub>, δ (ppm)) (+ve peaks): 145.89, 137.98, 131.03, 130.83, 130.21, 129.55, 128.98, 127.82, 127.48, 126.49, 123.69, 123.30, 122.87, 24.42, (-ve peaks): 50.71, 25.66; **HRMS**(ESI)m/z: [M+H]<sup>+</sup> Calculated for C<sub>32</sub>H<sub>26</sub>ClN<sub>3</sub>OS; 536.1563; found: 536.1561.

1.17 (*E*)-1-(2-methyl-4-phenylquinolin-3-yl)-3-(2-thiomorpholinoquinolin-3-yl)prop-2-en-1-one (**33**): Yellow solid (Obtained yield: 451 mg, 90% yield); m.p.:139 °C ; **<sup>1</sup>H NMR** (400 MHz, CDCl<sub>3</sub>, δ(ppm)): 8.15 (d, *J* = -8.44 Hz, 1H), 7.78 (q, *J* = -7.44 Hz, 3H), 7.63 (q, *J* = -7.40 Hz, 3H), 7.48 (t, *J* = -7.20 Hz, 1H), 7.41 (t, *J* = -6.88 Hz, 3H), 7.35 (dd, *J* = -1.92, -7.62 Hz, 4H), 6.70 (d, *J* = -16.12 Hz, 1H), 3.47 (t, *J* = -4.88 Hz, 4H), 2.76 (s, 3H), 2.61 (t, *J* = -4.96 Hz, 4H); **<sup>13</sup>C NMR** (100 MHz, CDCl<sub>3</sub>, δ (ppm)): 197.13, 159.61, 154.71, 147.83, 147.66, 145.43, 142.92, 137.81, 135.40, 132.70, 130.85, 130.37, 130.30, 129.04, 128.65, 128.45, 127.84, 127.59, 126.70, 126.22, 125.16, 124.85, 124.66, 121.98, 52.72, 27.25, 24.06; **DEPT-135** (100 MHz, CDCl<sub>3</sub>, δ (ppm)) (+ve peaks): 142.92, 137.81, 130.85, 130.37, 130.30, 129.04, 128.65, 128.62, 128.46, 127.84, 127.60, 126.71, 126.22, 124.85, 24.06, (-ve peaks): 52.72, 27.25; **HRMS**(ESI)m/z: [M+H]<sup>+</sup> Calculated for C<sub>32</sub>H<sub>27</sub>N<sub>3</sub>OS; 502.1953; found: 502.1958.

1.18 (*E*)-1-(6-chloro-4-(2-chlorophenyl)-2-methylquinolin-3-yl)-3-(2-thiomorpholinoquinolin-3-yl)prop-2-en-1-one (**34**): Yellow solid (Obtained yield: 523 mg, 92% yield); m.p.:130 °C ; **<sup>1</sup>H NMR** (400 MHz, CDCl<sub>3</sub>, δ(ppm)): 8.35 (s, 1H), 8.12 (d, *J* = -9.00 Hz, 1H), 7.86 (d, *J* = -8.56 Hz, 1H), 7.73 (dd, *J* = -2.28, -9.00 Hz, 1H), 7.70 (d, *J* = -8.08 Hz, 1H), 7.65 (ddd, *J* = -1.28, -6.98, Hz, 2H), 7.43 (d, *J* = -7.20 Hz, 1H), 7.39 (d, *J* = -12.52 Hz, 4H), 7.32 (d, *J* = -2.20 Hz, 1H), 6.47 (s, 1H), 9 (q, *J* = -4.76 Hz, 4H), 2.73 (s, 3H), 2.51 (t, *J* = -5.04 Hz, 4H); **<sup>13</sup>C NMR** (100 MHz, CDCl<sub>3</sub>, δ (ppm)):193.16, 158.36, 149.40, 146.52, 145.95, 140.59,

133.12, 132.96, 131.59, 130.82, 130.64, 130.64, 130.51, 129.75, 127.97, 127.90, 127.21, 125.78, 125.74, 125.74, 125.25, 124.74, 121.93; **DEPT-135** (100 MHz, CDCl<sub>3</sub>, δ (ppm))(+ve peaks): 140.59, 131.59, 130.81, 130.64, 130.52, 129.74, 127.97, 127.90, 127.21, 125.79, 124.75, 23.81 (-ve peaks): 53.10, 27.08; **HRMS**(ESI)m/z: [M+H]<sup>+</sup> + Calculated for C<sub>32</sub>H<sub>25</sub>Cl<sub>2</sub>N<sub>3</sub>OS; 570.1174; found: 570.1174.

**1.19** (*E*)-1-(6-chloro-4-(2-fluorophenyl)-2-methylquinolin-3-yl)-3-(2-thiomorpholinoquinolin-3-yl)prop-2-en-1-one (**35**): Yellow solid (Obtained yield: 480 mg, 90% yield); m.p:139 ° C ; **<sup>1</sup>H NMR** (400 MHz, CDCl<sub>3</sub>, δ(ppm)): 8.10 (d, *J* = -9.00 Hz, 1H), 7.90 (s, 1H), 7.80 (d, *J* = -8.40 Hz, 1H), 7.72 (dd, *J* = -2.20, -8.98 Hz, 1H), 7.64 (dd, *J* = -2.52, -11.80 Hz, 2H), 7.42 (t, *J* = -5.40 Hz, 2H), 7.37 (t, *J* = -7.64 Hz, 2H), 7.26 (s, 3H), 7.10 (t, *J* = -9.12 Hz, 1H), 6.83 (d, *J* = -16.28 Hz, 1H), 3.47 (q, *J* = -4.96 Hz, 4H), 2.74 (s, 3H), 2.56 (t, *J* = -5.00 Hz, 4H); **<sup>13</sup>C NMR** (100 MHz, CDCl<sub>3</sub>, δ (ppm)): 196.35, 160.56, 159.73, 158.10, 155.09, 147.80, 145.89, 144.02, 139.08, 137.99, 134.14, 133.00, 132.29, 132.26, 131.44, 131.36, 131.06, 130.75, 127.94, 127.84, 127.64, 124.95, 124.68, 124.53, 121.64, 115.93, 115.72, 52.81, 27.27, 23.93; **DEPT-135** (100 MHz, CDCl<sub>3</sub>, δ (ppm)) (+ve peaks): 144.02, 138.00, 132.29, 132.26, 131.44, 131.06, 130.75, 127.94, 127.84, 127.63, 124.95, 124.53, 115.93, 115.72, 23.93, (-ve peaks): 52.81, 27.27; **HRMS**(ESI)m/z: [M+H]<sup>+</sup> + Calculated for C<sub>32</sub>H<sub>25</sub>ClFN<sub>3</sub>OS; 554.1469; found: 554.1469.

**1.20** (*E*)-1-(2-methyl-6-nitro-4-phenylquinolin-3-yl)-3-(2-thiomorpholinoquinolin-3-yl)prop-2-en-1-one (**36**): Yellow solid (Obtained yield: 486 mg, 89% yield); m.p:137 ° C ; **<sup>1</sup>H NMR** (400 MHz, CDCl<sub>3</sub>, δ(ppm)): 8.57 (t, *J* = -8.20 Hz, 2H), 8.27 (d, *J* = -9.28 Hz, 1H), 7.79 (d, *J* = -10.56 Hz, 2H), 7.61 (dd, *J* = -7.84, -15.36 Hz, 3H), 7.49 (d, *J* = -3.80 Hz, 3H), 7.37 (t, *J* = -6.68 Hz, 3H), 6.71 (d, *J* = -15.88 Hz, 1H), 3.47 (d, *J* = -4.40 Hz, 4H), 2.80 (s, 3H), 2.63 (t, *J* = -4.72 Hz, 4H); **<sup>13</sup>C NMR** (100 MHz, CDCl<sub>3</sub>, δ (ppm)): 146.95, 145.89, 145.70, 137.98, 134.47, 133.80, 131.03, 130.83, 130.21, 129.54, 128.98, 127.82, 127.48, 126.49, 124.54, 123.69, 123.29, 123.09, 122.87, 119.65, 50.71, 25.66, 24.42; **DEPT-135** (100 MHz, CDCl<sub>3</sub>, δ (ppm)) (+ve peaks):145.89, 137.98, 131.03, 130.83, 130.21, 129.55, 128.98, 127.82, 127.48, 123.69, 123.30, 122.87, 24.42, (-ve peaks): 50.71, 25.66; **HRMS**(ESI)m/z: [M+H]<sup>+</sup> + Calculated for C<sub>32</sub>H<sub>26</sub>N<sub>4</sub>O<sub>3</sub>S; 547.1803; found: 547.1804.



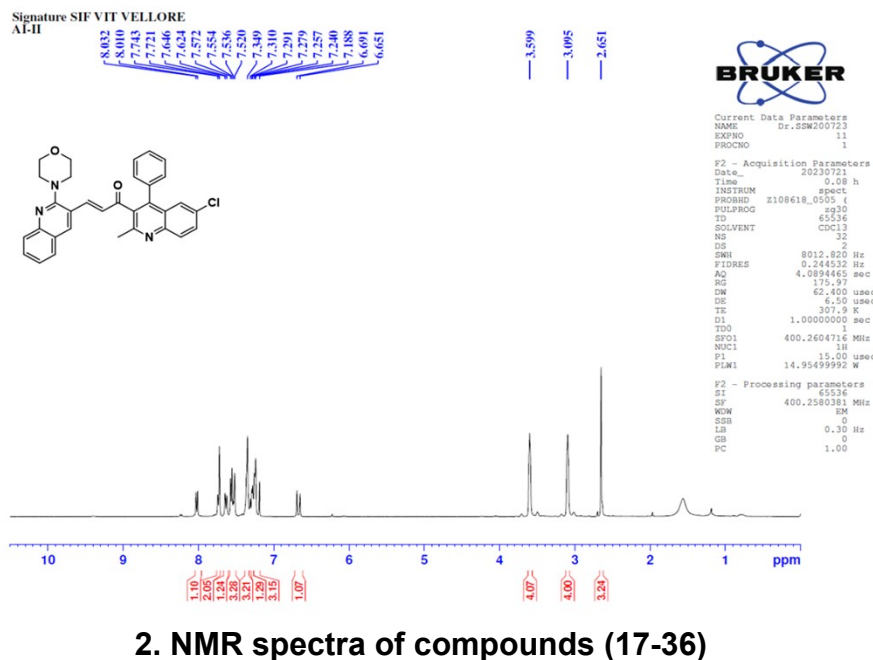

Figure S1. The <sup>1</sup>H NMR Spectrum of the compound 17

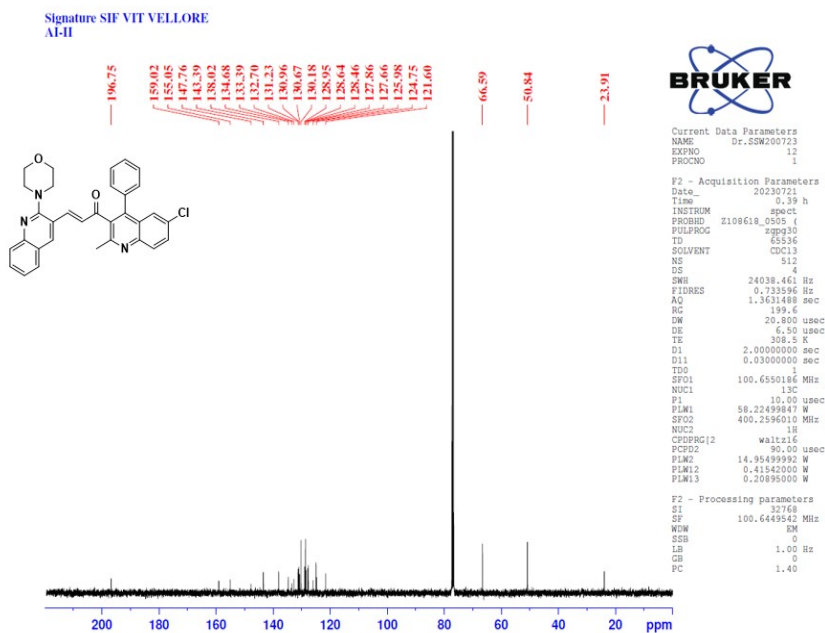

Figure S2. The  $^{13}\text{C}$  NMR Spectrum of the compound **17**

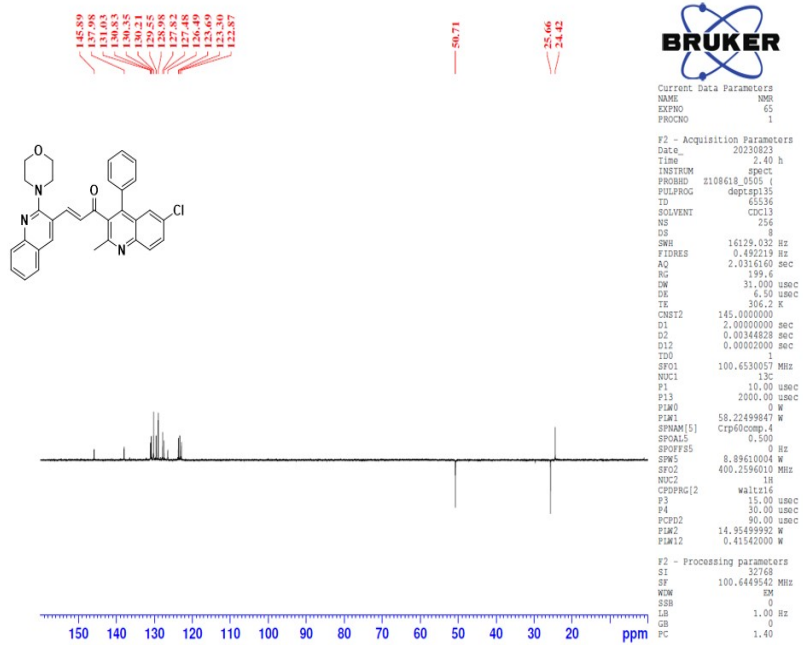

Figure S3. The DEPT-135 Spectrum of the compound **17**

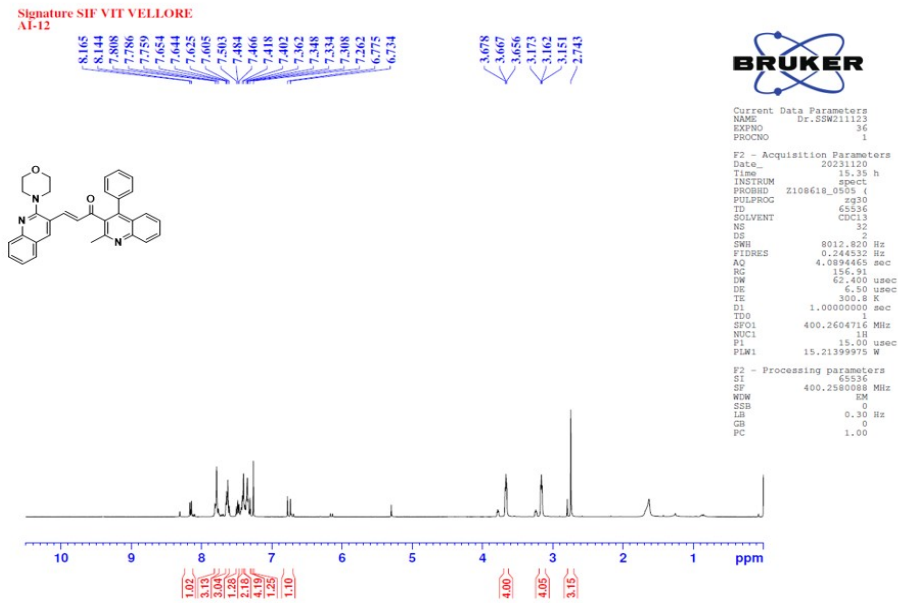

Figure S4. The  $^1\text{H}$  NMR Spectrum of the compound **18**

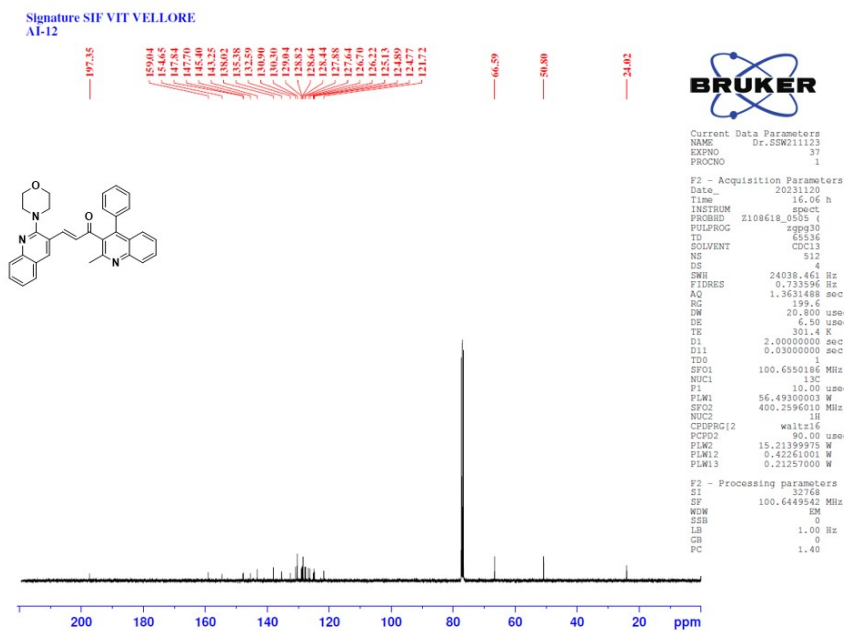

Figure S5. The  $^{13}\text{C}$  NMR Spectrum of the compound **18**

Signature SIF VII VELLORE  
AF-12

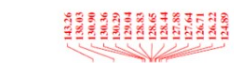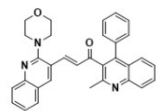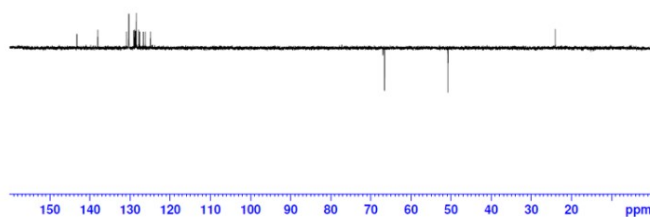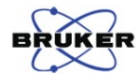

```
Current Data Parameters
NAME      Sr.SW211123
EXPNO     38
PROCNO    1

F2 - Acquisition Parameters
Date_     20231120
Time      16.26 h
INSTRUM   spect
PROBHD    zbggpcr_0500 (
PULPROG   deptcp135
TD         65536
SOLVENT   CDCl3
NS         256
DS         8
SWH        16129.032 Hz
FIDRES     0.430219 Hz
AQ         2.0316160 sec
RG         395.6
DM         31.000 usec
DE         4.50 usec
TE         301.3 K
CMT2      145.000000
D1         2.0000000 sec
D2         0.0034488 sec
D12        0.0000200 sec
ID0        1
FFO1       100.6530017 MHz
NUC1       13C
P1         10.00 usec
P13        2000.00 usec
PLA0       0 W
PLM1       56.49300003 W
SFOA1(1)   Cp66000cp.4
SFOALS     0.500
SFOFFS     0 Hz
SFW5       8.63150024 W
SFO2       400.2596010 MHz
NUC2       1H
CPDPRG2    waltz16
P3         15.00 usec
P4         30.00 usec
PCPD0      90.00 usec
PLM2       15.21399975 W
PLM12      0.42261001 W

F2 - Processing parameters
SI         32768
SF         100.6449541 MHz
WDW        EM
SSB        0
LB         1.00 Hz
GB         0
PC         1.40
```

Figure S6. The DEPT-135 Spectrum of the compound **18**

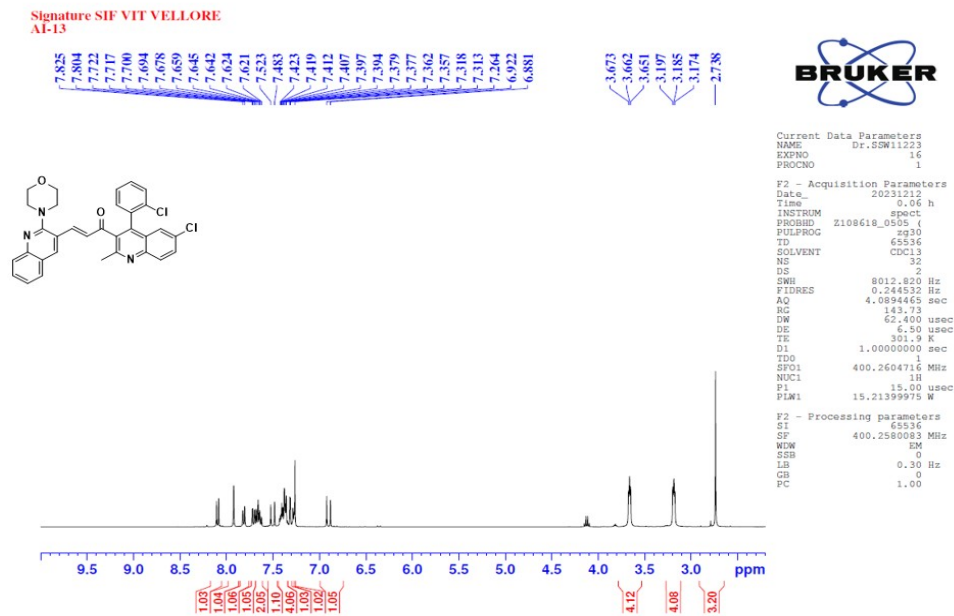

Figure S7. The  $^1\text{H}$  NMR Spectrum of the compound 19

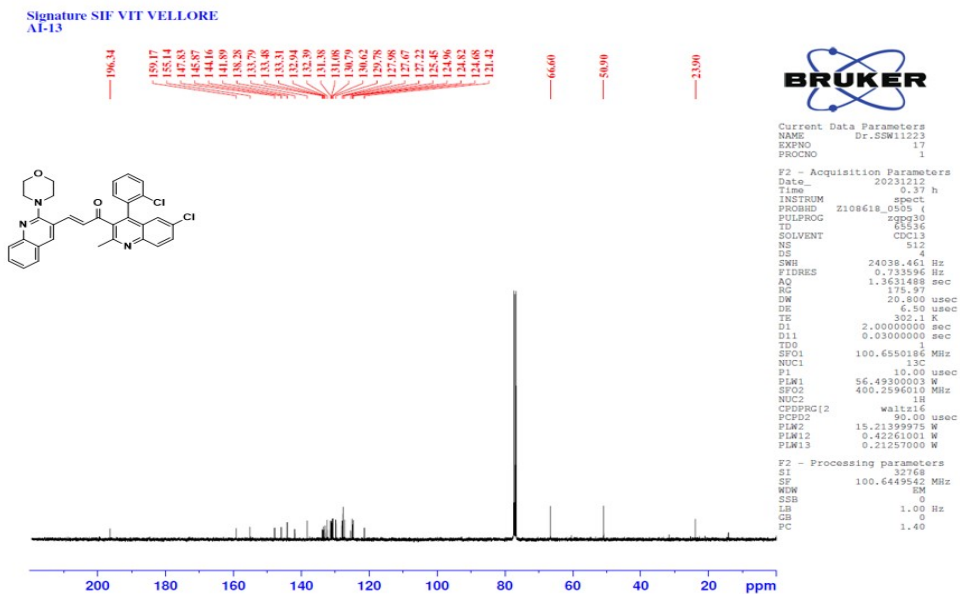

Figure S8. The  $^{13}\text{C}$  NMR Spectrum of the compound 19

Signature SIF VIT VELLORE  
AI-13

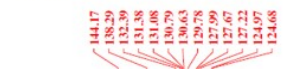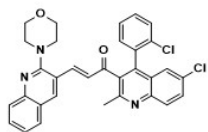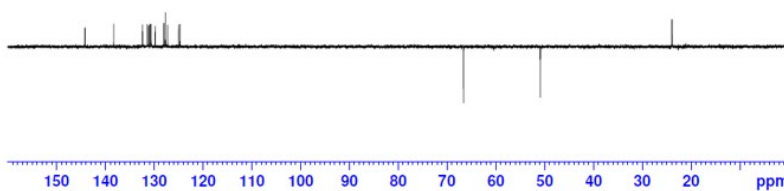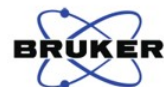

Current Data Parameters  
NAME Dr.SSW1223  
EXPNO 18  
PROCNO 1

F2 - Acquisition Parameters  
Date\_ 20231212  
Time 0.37 h  
INSTRUM spect  
PROBHD z108618\_0505 (4  
PULPROG deptpp135  
TD 65536  
SOLVENT CDC13  
NS 256  
DS 8  
SWH 16129.032 Hz  
FIDRES 0.492219 Hz  
AQ 2.0316160 sec  
RG 199.6  
DW 31.000 usec  
DE 6.50 usec  
TE 302.0 K  
CNET2 145.0000000  
D1 2.0000000 sec  
D2 0.00344828 sec  
D12 0.00002000 sec  
TDO 1  
SFO1 100.6530057 MHz  
NUC1 13C  
P1 10.00 usec  
P13 2000.00 usec  
PLM0 0 W  
PLM1 56.49300003 W  
SPNAM[5] Crp60comp.4  
SFOAL5 0.500  
SPOFFS5 0 Hz  
SFM5 8.63150024 W  
SFO2 400.2596010 MHz  
NUC2 1H  
CPDPRG2 waltz16  
P3 15.00 usec  
P4 30.00 usec  
PCPD2 90.00 usec  
PLM2 15.21399975 W  
PLM12 0.42261001 W

F2 - Processing parameters  
SI 32768  
SF 100.6449542 MHz  
WDW EM  
SSB 0  
LB 1.00 Hz  
GB 0  
PC 1.40

Signature SIF VIT VELLORE  
AI-14

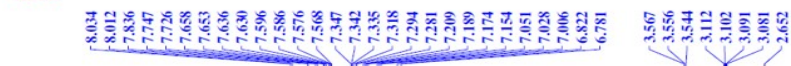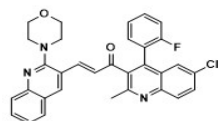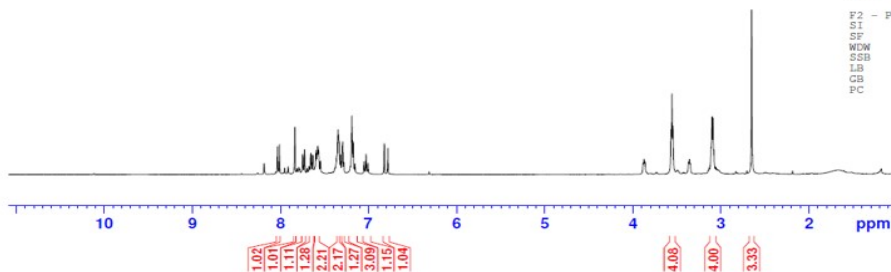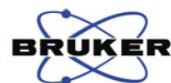

Current Data Parameters  
NAME AI-14  
EXPNO 32  
PROCNO 1

F2 - Acquisition Parameters  
Date\_ 20230728  
Time 16.48 h  
INSTRUM spect  
PROBHD z108618\_0505 (4  
PULPROG zg30  
TD 65536  
SOLVENT CDC13  
NS 32  
DS 2  
SWH 8012.820 Hz  
FIDRES 0.244532 Hz  
AQ 4.0894465 sec  
RC 143.73  
DW 62.400 usec  
DE 6.50 usec  
TE 304.1 K  
D1 1.0000000 sec  
TDO 1  
SFO1 400.2604716 MHz  
NUC1 1H  
P1 15.00 usec  
PLW1 14.95499992 W

F2 - Processing parameters  
SI 65536  
SF 400.2580382 MHz  
WDW EM  
SSB 0  
LB 0.30 Hz  
GB 0  
PC 1.00

Figure S9. The DEPT-135 Spectrum of the compound 19

Figure S10. The <sup>1</sup>H NMR Spectrum of the compound **20**

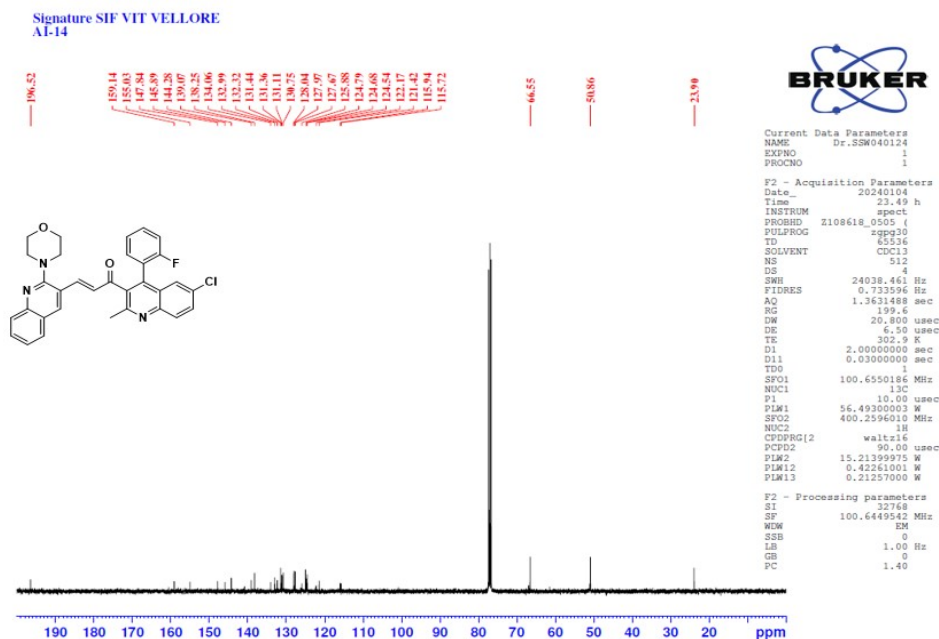

Figure S11. The <sup>13</sup>C NMR Spectrum of the compound **20**

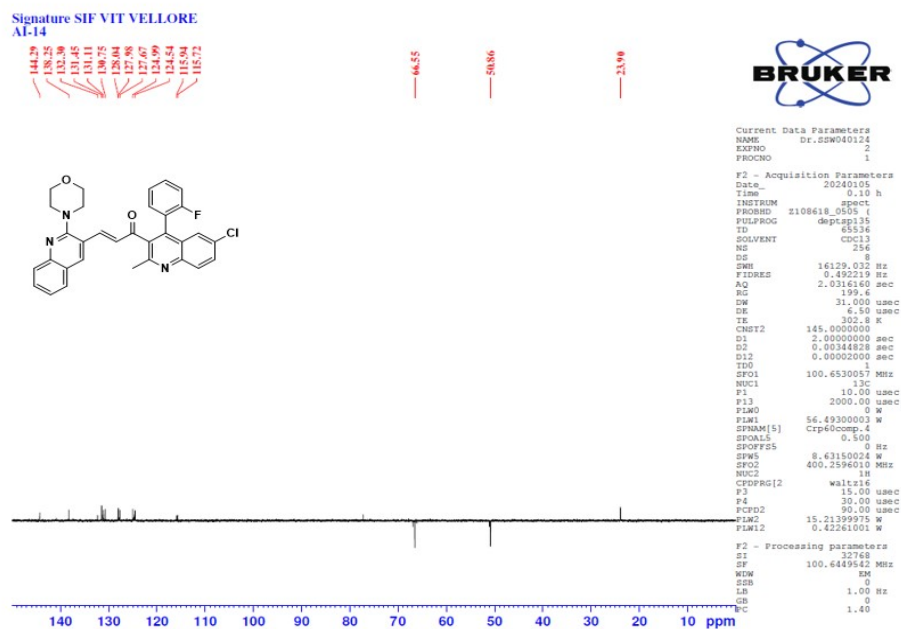

Figure S12. The DEPT-135 Spectrum of the compound **20**

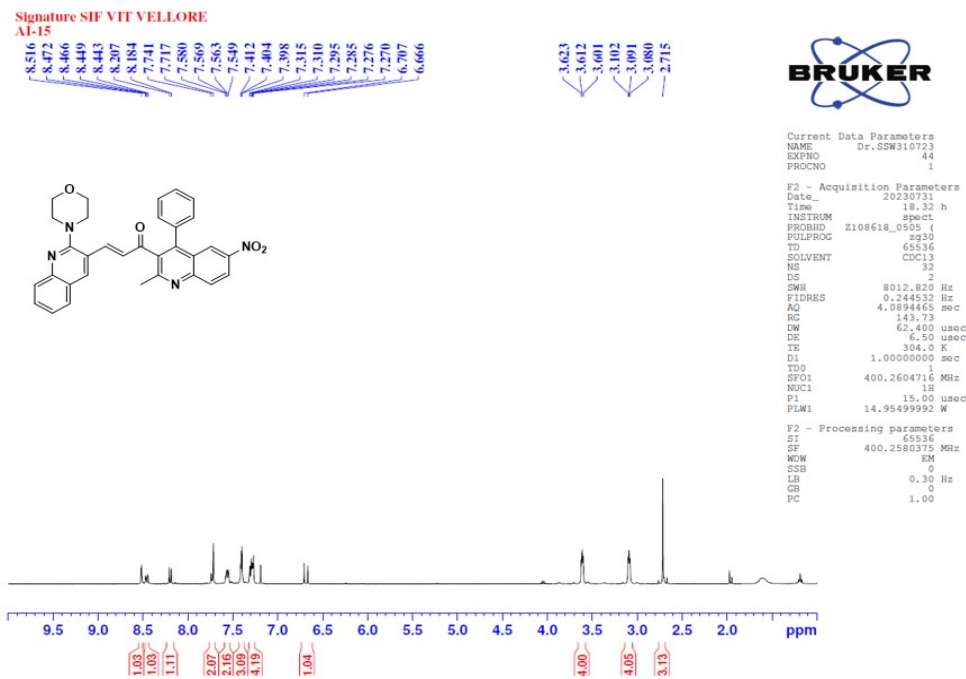

Figure S13. The  $^1\text{H}$  NMR Spectrum of the compound **21**



Signature SIF VIT VELLORE  
AI-15

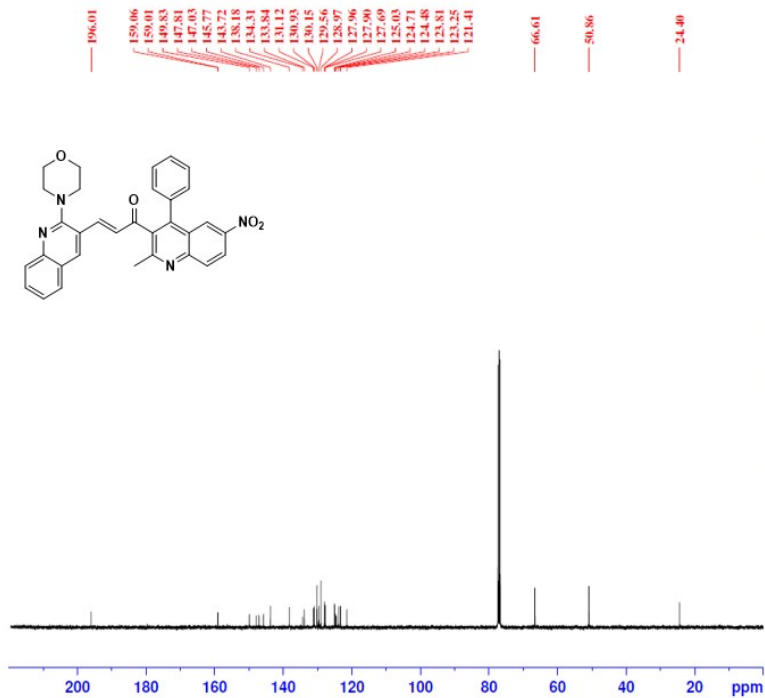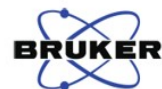

Current Data Parameters  
NAME Dr.SSW310723  
EXPNO 45  
PROCNO 1

F2 - Acquisition Parameters  
Date\_ 20230731  
Time 19.04 h  
INSTRUM spect  
PROBHD z108618\_0505 (1  
PULPROG zgpg30  
TD 65536  
SOLVENT CDC13  
NS 512  
DS 4  
SWH 24038.461 Hz  
FIDRES 0.733596 Hz  
AQ 1.3631488 sec  
RG 88.69  
DW 20.800 usec  
DE 6.50 usec  
TE 304.7 K  
D1 2.0000000 sec  
D11 0.0300000 sec  
TDO 1  
SFO1 100.6550186 MHz  
NUC1 13C  
P1 10.00 usec  
PLW1 58.22499847 W  
SFO2 400.2596010 MHz  
NUC2 1H  
PCPD2[2] wait116  
PCPD2 90.00 usec  
PLW2 14.95499992 W  
PLW12 0.41542000 W  
PLW13 0.20895000 W

F2 - Processing parameters  
SI 32768  
SF 100.6449542 MHz  
WDW EM  
SSB 0  
LB 1.00 Hz  
GB 0  
PC 1.40

Figure S14. The  $^{13}\text{C}$  NMR Spectrum of the compound **21**

Signature SIF VIT VELLORE  
AI-15

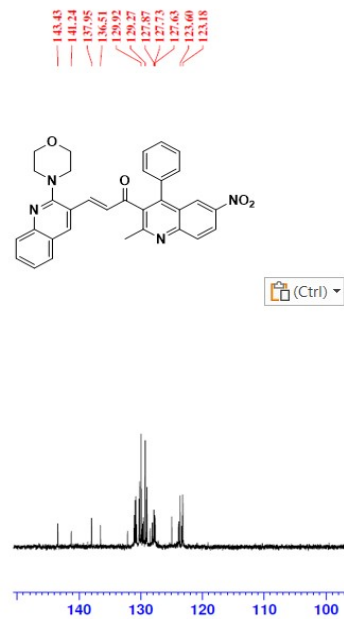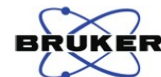

Current Data Parameters  
NAME Dr.SSW300923  
EXPNO 71  
PROCNO 1

F2 - Acquisition Parameters  
Date\_ 20230930  
Time 2.10 h  
INSTRUM spect  
PROBHD z108618\_0505 (1  
PULPROG deptsp135  
TD 65536  
SOLVENT CDC13  
NS 256  
DS 8  
SWH 16129.032 Hz  
FIDRES 0.492019 Hz  
AQ 2.0316160 sec  
RG 199.6  
LW 31.000 usec  
DE 6.50 usec  
TE 305.0 K  
CNST2 145.0000000  
D1 2.0000000 sec  
D2 0.00344828 sec  
D12 0.00002000 sec  
TDO 1  
SFO1 100.6530057 MHz  
NUC1 13C  
P1 10.00 usec  
P13 2000.00 usec  
PLW0 0 W  
PLW1 58.22499847 W  
SFO2 400.2596010 MHz  
SFO2S5 0 Hz  
SFO2S 8.89610004 W  
SFO2 400.2596010 MHz  
NUC2 1H  
PCPD2[2] wait116  
PCPD2 90.00 usec  
P3 15.00 usec  
P4 30.00 usec  
PCPD2 90.00 usec  
PLW2 14.95499992 W  
PLW12 0.41542000 W

F2 - Processing parameters  
SI 32768  
SF 100.6449542 MHz  
WDW EM  
SSB 0  
LB 1.00 Hz  
GB 0  
PC 1.40

Figure S15. The DEPT-135 Spectrum of the compound **21**

Figure S16. The <sup>1</sup>H NMR Spectrum of the compound **22**

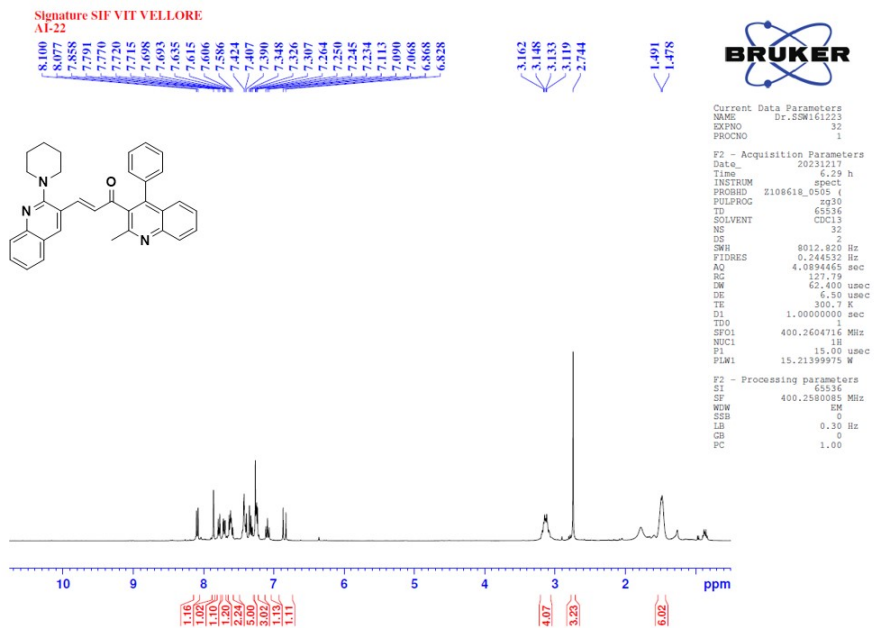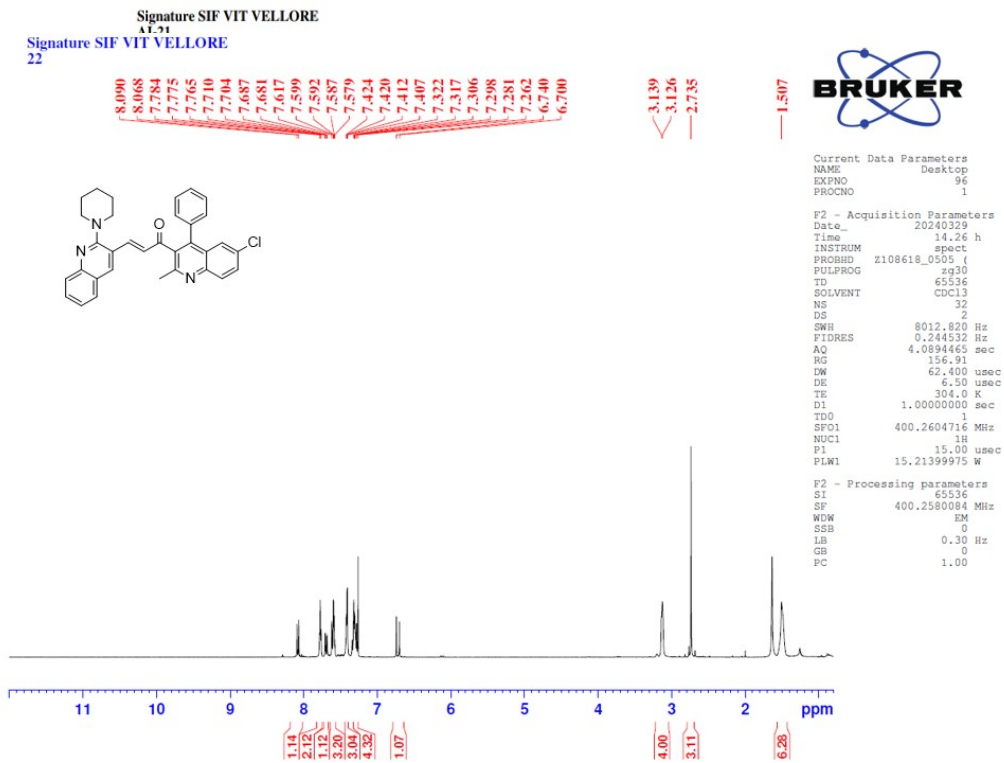

Figure S17. The <sup>13</sup>C NMR Spectrum of the compound **22**

Figure S18. The DEPT-135 Spectrum of the compound **22**

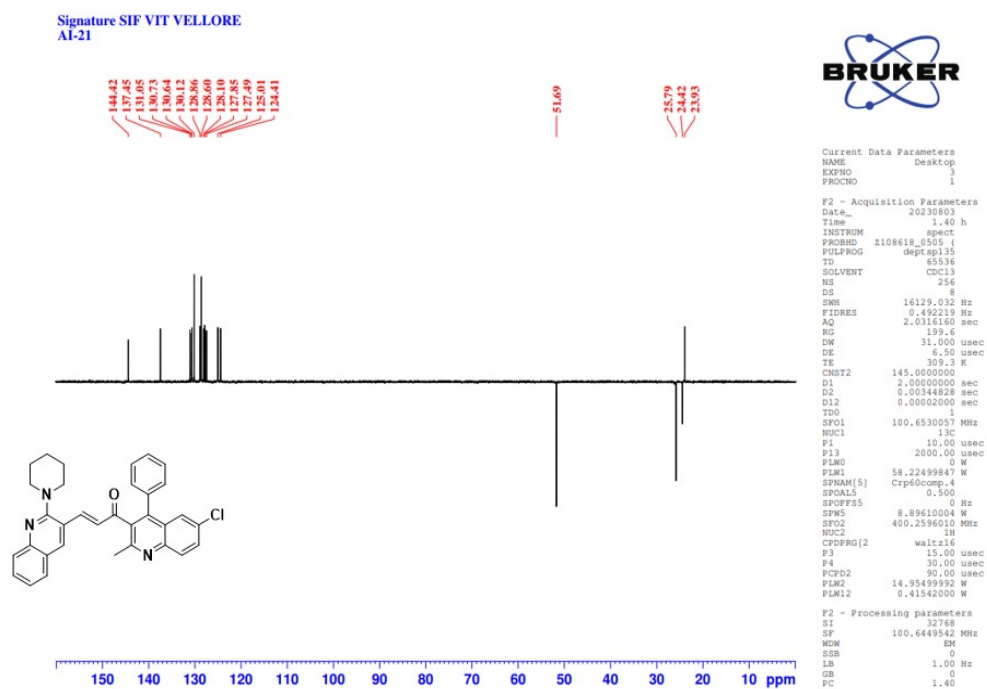

Figure S19. The  $^1\text{H}$  NMR Spectrum of the compound **23**

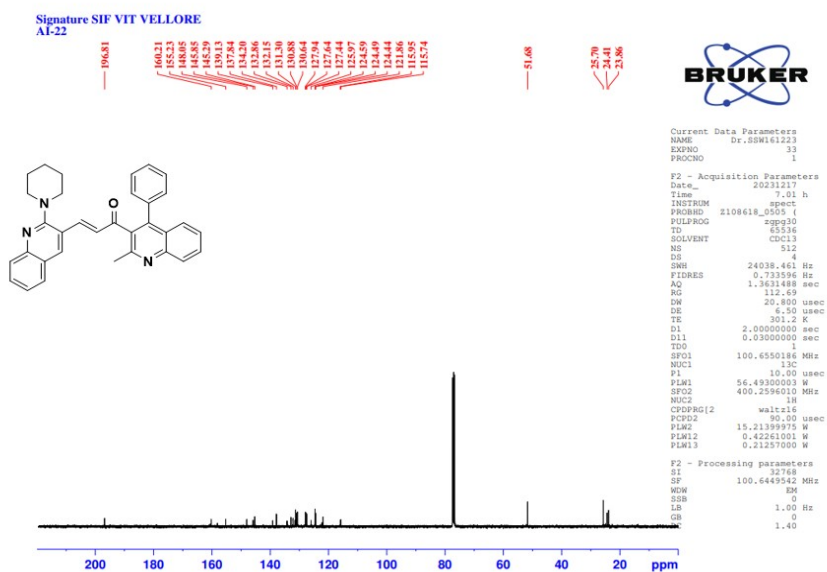

Figure S20. The  $^{13}\text{C}$  NMR Spectrum of the compound **23**

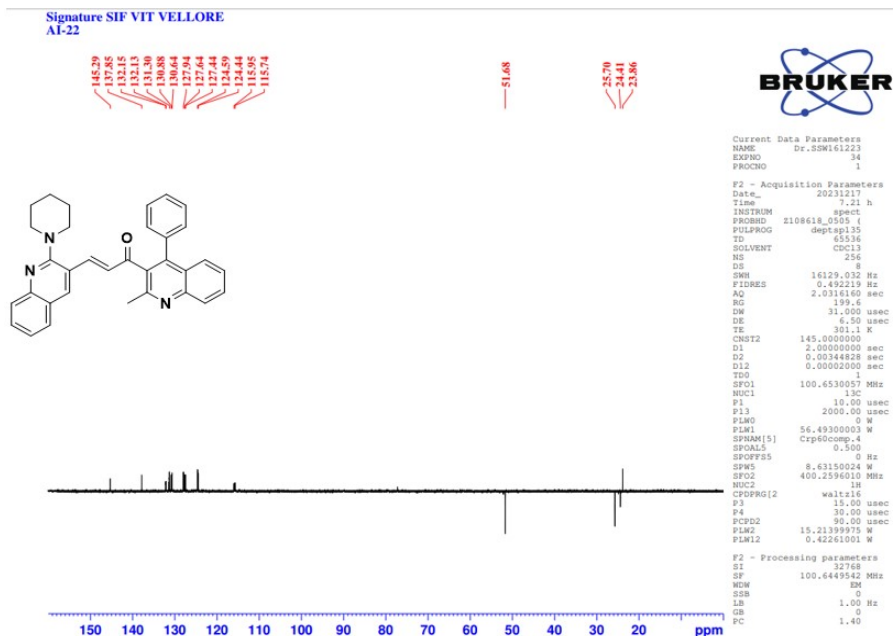

Figure S21. The DEPT-135 Spectrum of the compound **23**

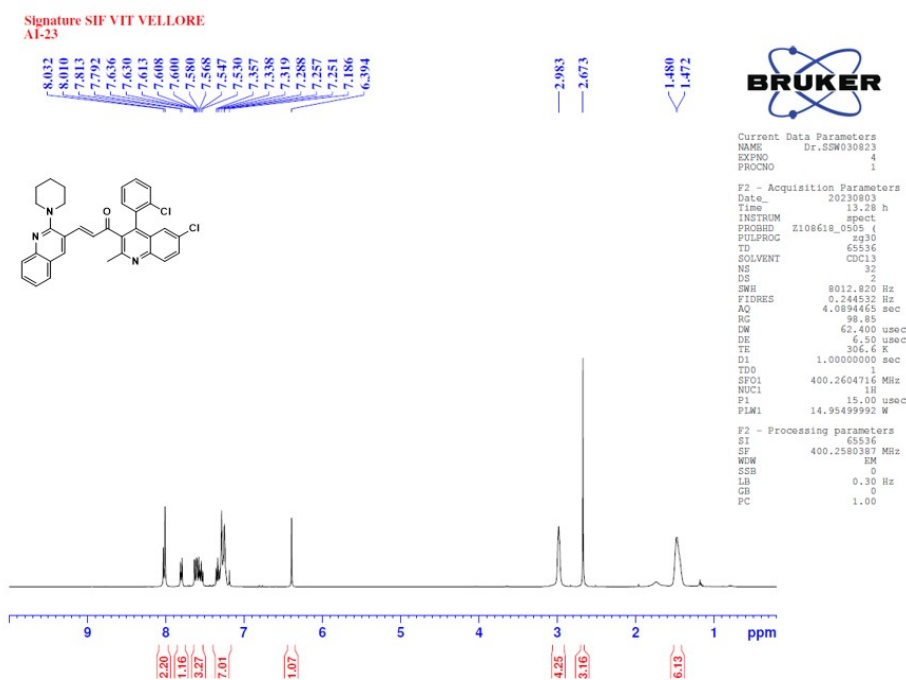

Signature SIF VIT VELLORE  
AI-23

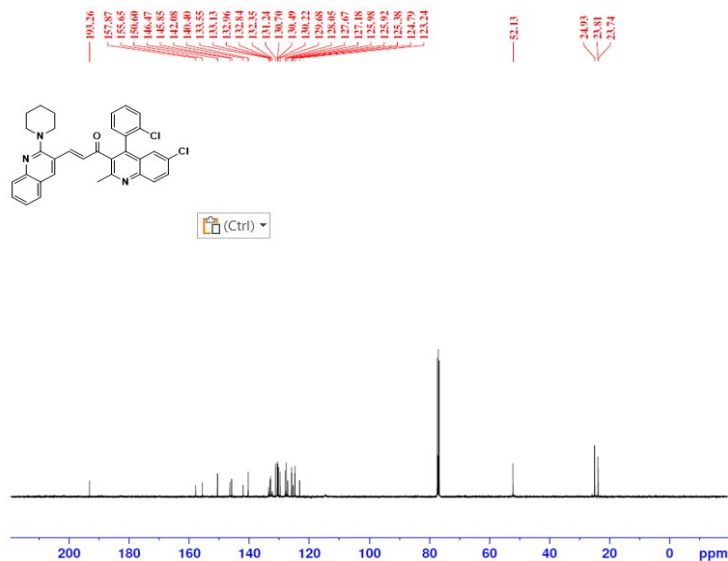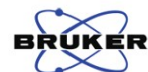

Current Data Parameters  
NAME Desktop  
EXPNO 11  
PROCNO 1

F2 - Acquisition Parameters  
Date\_ 20230806  
Time 3.27 h  
INSTRUM spect  
PROBHD Z108618\_0505 (4  
PULPROG zgpg30  
TD 65536  
SOLVENT CDCl3  
NS 512  
DS 4  
SWH 24038.461 Hz  
FIDRES 0.733596 Hz  
AQ 1.3631488 sec  
RG 199.6  
DW 20.800 usec  
DE 6.50 usec  
TE 306.1 K  
D1 2.0000000 sec  
D11 0.0300000 sec  
TDD 1  
SFO1 100.6550186 MHz  
NUC1 13C  
P1 10.00 usec  
PLM1 58.22499847 W  
SFO2 400.2596010 MHz  
NUC2 1H  
CPDPRG2 waltz16  
PCPD2 90.00 usec  
PLM2 14.95499992 W  
PLM12 0.41542000 W  
PLM13 0.20899000 W

F2 - Processing parameters  
SI 32768  
SF 100.6449542 MHz  
WOW 2M  
SSB 0  
LB 1.00 Hz  
GB 0  
PC 1.40

figure S22. The  $^1\text{H}$  NMR Spectrum of the compound **24**

Signature SIF VIT VELLORE  
AI-23

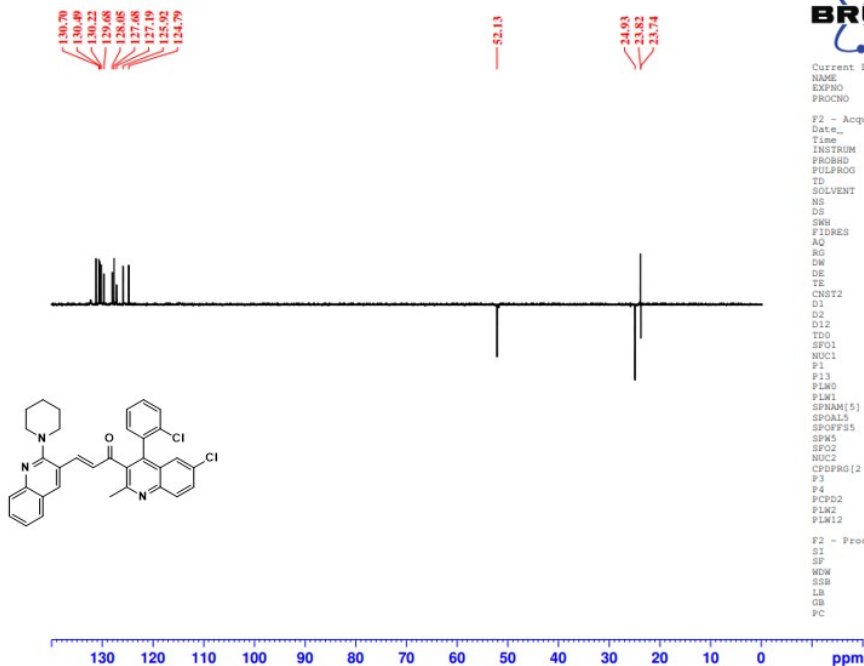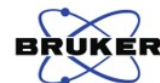

Current Data Parameters  
NAME Desktop  
EXPNO 12  
PROCNO 1

F2 - Acquisition Parameters  
Date\_ 20230806  
Time 3.47 h  
INSTRUM spect  
PROBHD Z108618\_0505 (4  
PULPROG deptsp135  
TD 65536  
SOLVENT CDCl3  
NS 256  
DS 8  
SWH 16129.032 Hz  
FIDRES 0.492219 Hz  
AQ 2.0316160 sec  
RG 199.6  
DW 31.000 usec  
DE 6.50 usec  
TE 305.9 K  
CNST2 145.0000000  
D1 2.0000000 sec  
D2 0.00344828 sec  
D12 0.0002000 sec  
TDD 1  
SFO1 100.6530057 MHz  
NUC1 13C  
P1 10.00 usec  
PL1 2000.00 usec  
PLM0 0 W  
PLM1 58.22499847 W  
SPNAM[5] Crg66comp.4  
SFOAL5 0.500  
SPOFFS5 0 Hz  
SFW5 8.89610004 W  
SFO2 400.2596010 MHz  
NUC2 1H  
CPDPRG2 waltz16  
F3 15.00 usec  
F4 30.00 usec  
PCPD2 90.00 usec  
PLM2 14.95499992 W  
PLM12 0.41542000 W

F2 - Processing parameters  
SI 32768  
SF 100.6449542 MHz  
WOW 2M  
SSB 0  
LB 1.00 Hz  
GB 0  
PC 1.40

Figure S23. The  $^{13}\text{C}$  NMR Spectrum of the compound **24**

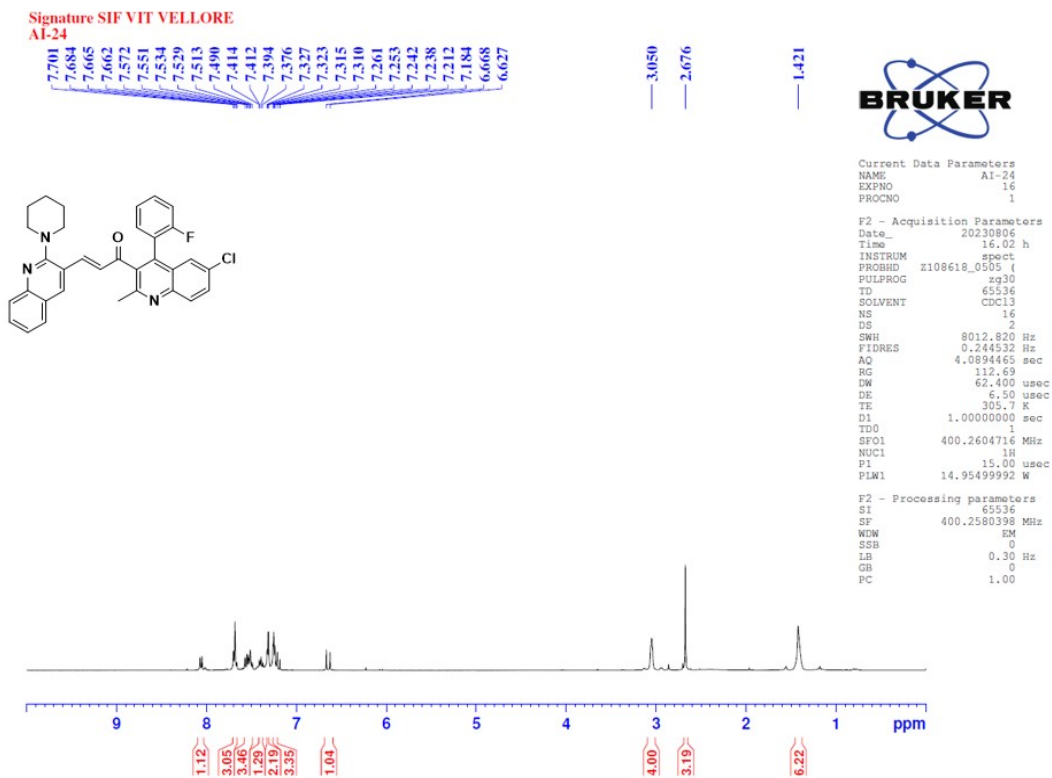

Figure S24. The DEPT-135 Spectrum of the compound **24**

Figure S25. The  $^1\text{H}$  NMR Spectrum of the compound **25**

Signature SIF VIT VELLORE  
AI-24

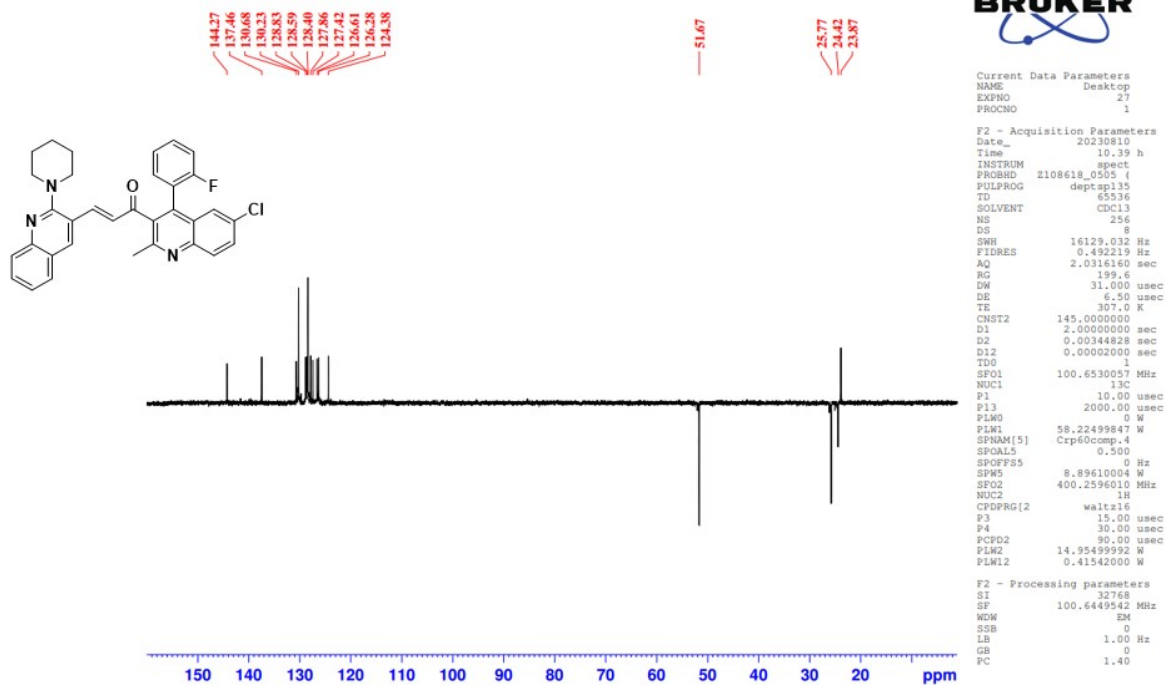

Figure S26. The <sup>13</sup>C NMR Spectrum of the compound 25

Signature SIF VIT VELLORE  
AI-24

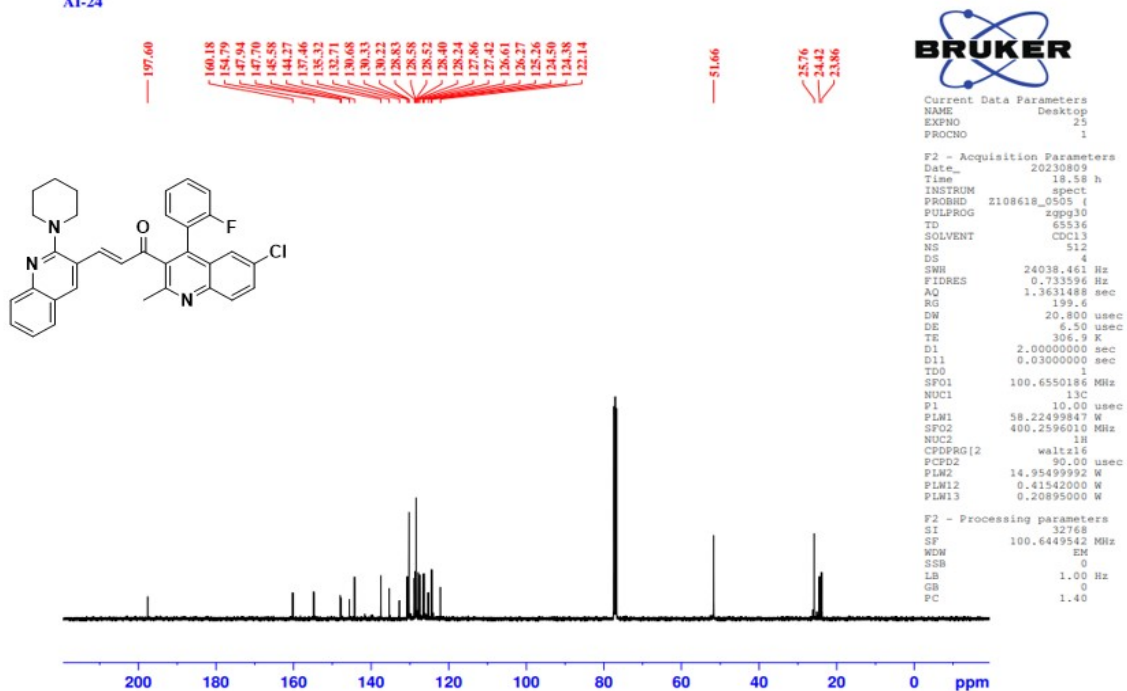

Figure S27. The DEPT-135 Spectrum of the compound 25

Figure S28. The <sup>1</sup>H NMR Spectrum of the compound **26**

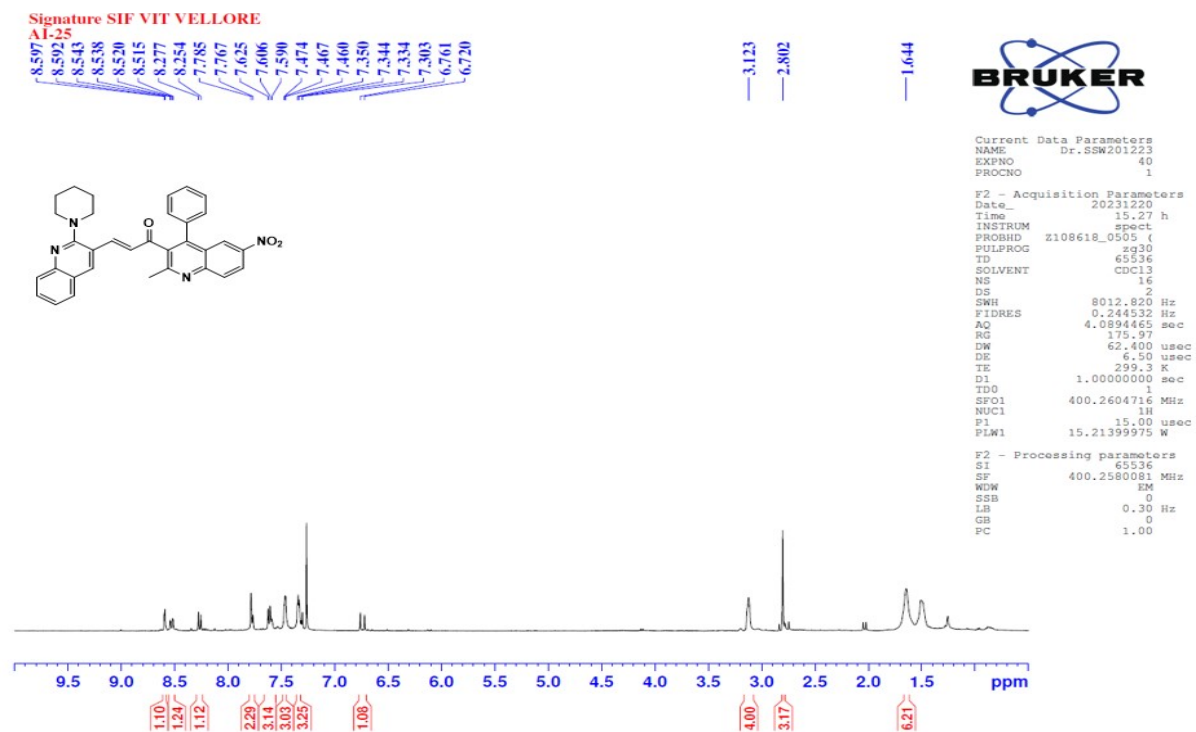



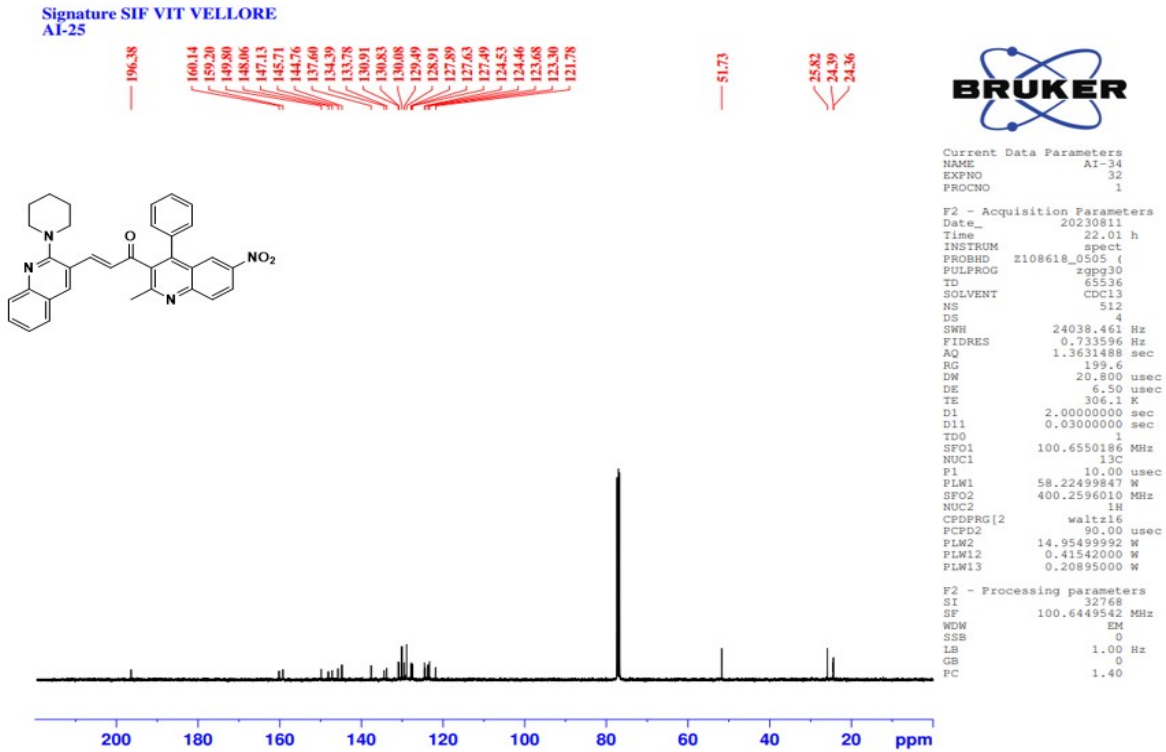

Figure S29. The  $^{13}\text{C}$  NMR Spectrum of the compound **26**

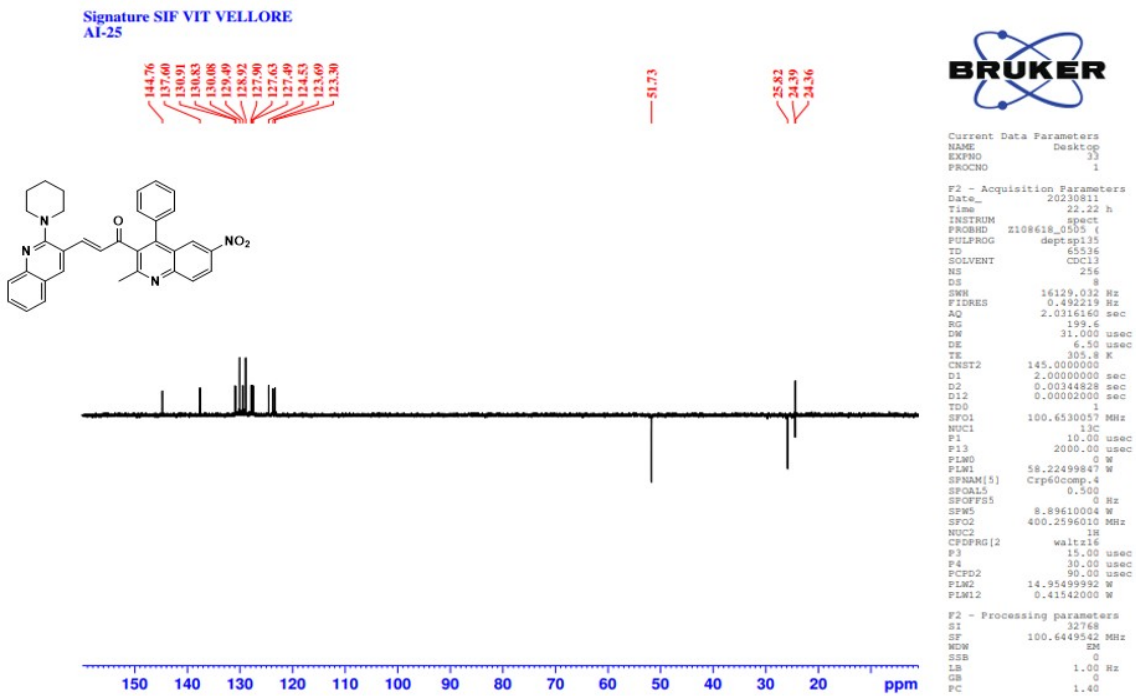

Figure S30. The DEPT-135 Spectrum of the compound **26**

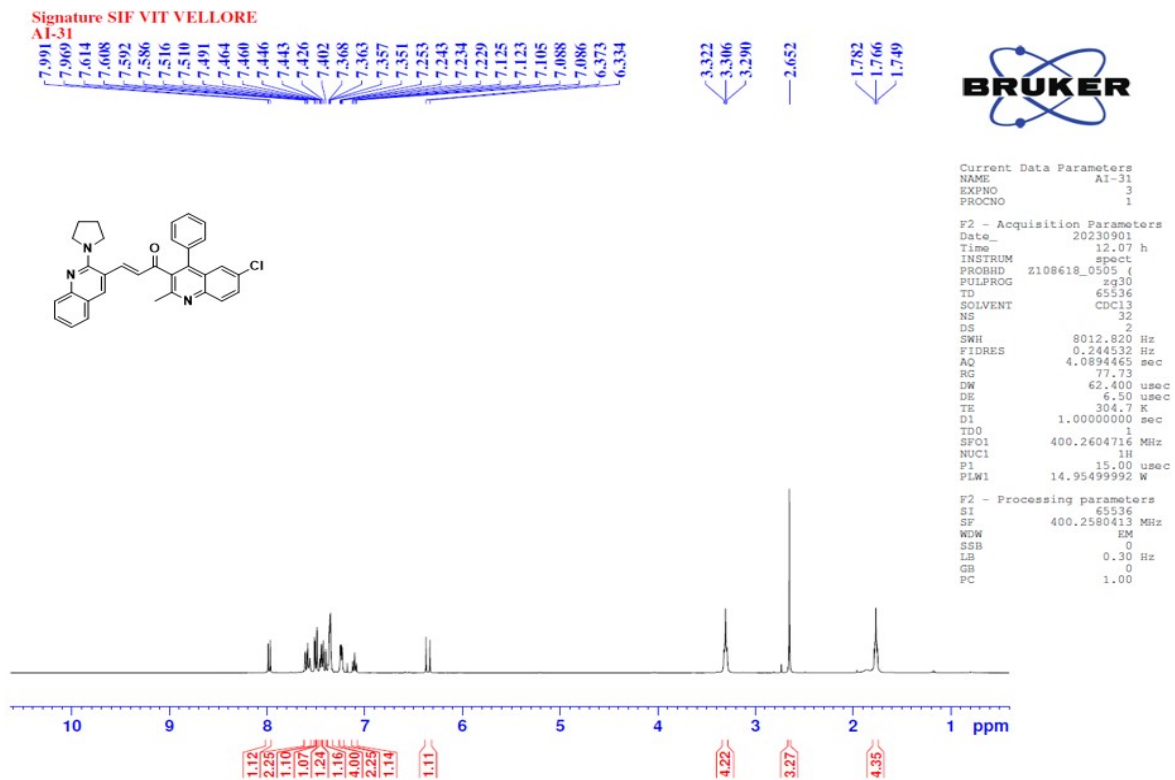

Figure S31. The  $^1\text{H}$  NMR Spectrum of the compound **27**

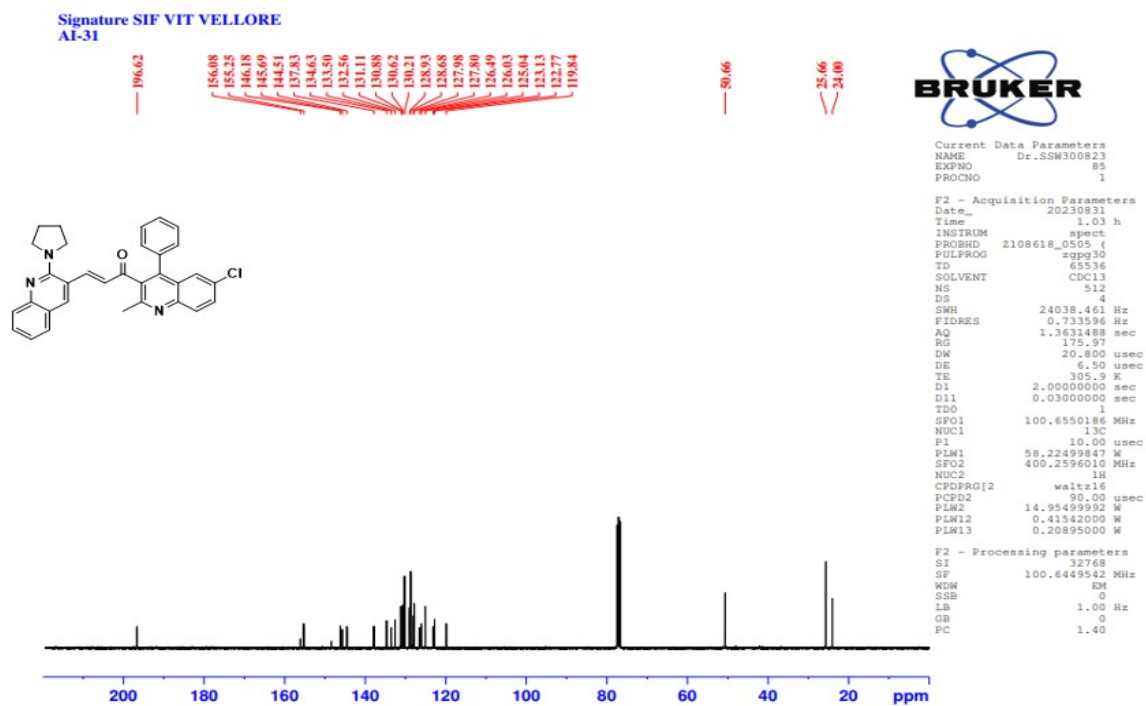

Figure S32. The  $^{13}\text{C}$  NMR Spectrum of the compound **27**

Signature SIF VIT VELLORE  
AI-31

145.69  
137.83  
131.12  
130.89  
130.62  
130.21  
128.94  
128.68  
127.98  
126.49  
125.04  
122.77

50.66

25.66  
24.00

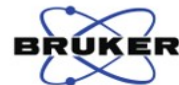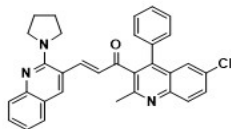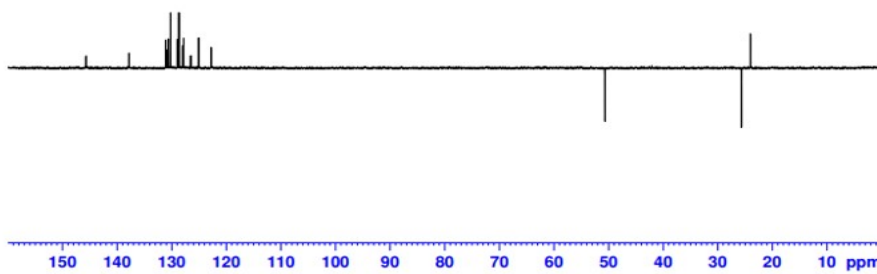

Current Data Parameters  
NAME Dr.SSM300823  
EXPNO 86  
PROCNO 1

F2 - Acquisition Parameters  
Date\_ 20230831  
Time 1.23 h  
INSTRUM spect  
PROBHD z108618\_0505 (4  
PULPROG deptsp135  
TD 65536  
SOLVENT CDCl3  
NS 256  
DS 8  
SWH 16129.032 Hz  
FIDRES 0.492219 Hz  
AQ 2.0316160 sec  
RG 199.6  
DW 31.000 usec  
DE 6.50 usec  
TE 305.7 K  
CNST2 145.0000000  
D1 2.00000000 sec  
D2 0.00344828 sec  
D12 0.00002000 sec  
TDO 1  
SFO1 100.6530057 MHz  
NUC1 13C  
P1 10.00 usec  
P12 2000.00 usec  
PLM0 0 W  
PLM1 58.22499847 W  
SFOAL5(5) Crp60comp.4  
SFOAL5 0.500  
SFOFF55 0 Hz  
SWS 8.89610004 W  
SFO2 400.2596010 MHz  
NUC2 1H  
CDEPRG(2) waltz16  
P3 15.00 usec  
P4 30.00 usec  
PCPD2 90.00 usec  
PLM2 14.95499992 W  
PLM12 0.41542000 W

F2 - Processing parameters  
SI 32768  
SF 100.6448942 MHz  
WDW EM  
SSB 0  
LB 1.00 Hz  
GB 0  
PC 1.40

Figure S33. The DEPT-135 Spectrum of the compound 27

Signature SIF VIT VELLORE  
AI-32

8.005  
7.983  
7.632  
7.627  
7.610  
7.604  
7.525  
7.520  
7.506  
7.465  
7.446  
7.411  
7.378  
7.370  
7.365  
7.262  
7.253  
7.244  
7.189  
7.146  
7.127  
7.109  
6.385  
6.345

3.340  
3.324  
3.308  
2.661  
1.798  
1.782  
1.766

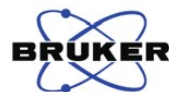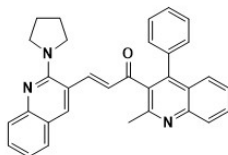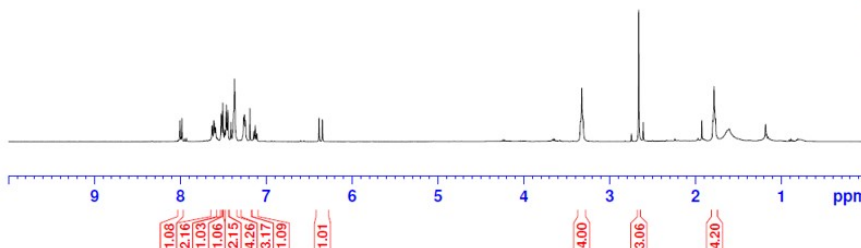

Current Data Parameters  
NAME Dr.SS110823  
EXPNO 30  
PROCNO 1

F2 - Acquisition Parameters  
Date\_ 20230811  
Time 12.35 h  
INSTRUM spect  
PROBHD z108618\_0505 (4  
PULPROG zgpg30  
TD 65536  
SOLVENT CDCl3  
NS 32  
DS 2  
SWH 8012.820 Hz  
FIDRES 0.244532 Hz  
AQ 4.0894465 sec  
RG 156.91  
DW 62.400 usec  
DE 6.50 usec  
TE 305.3 K  
D1 1.00000000 sec  
TDO 1  
SFO1 400.2604716 MHz  
NUC1 1H  
P1 15.00 usec  
PLM1 14.95499992 W

F2 - Processing parameters  
SI 65536  
SF 400.2580376 MHz  
WDW EM  
SSB 0  
LB 0.30 Hz  
GB 0  
PC 1.00

Figure S34. The <sup>1</sup>H NMR Spectrum of the compound 28

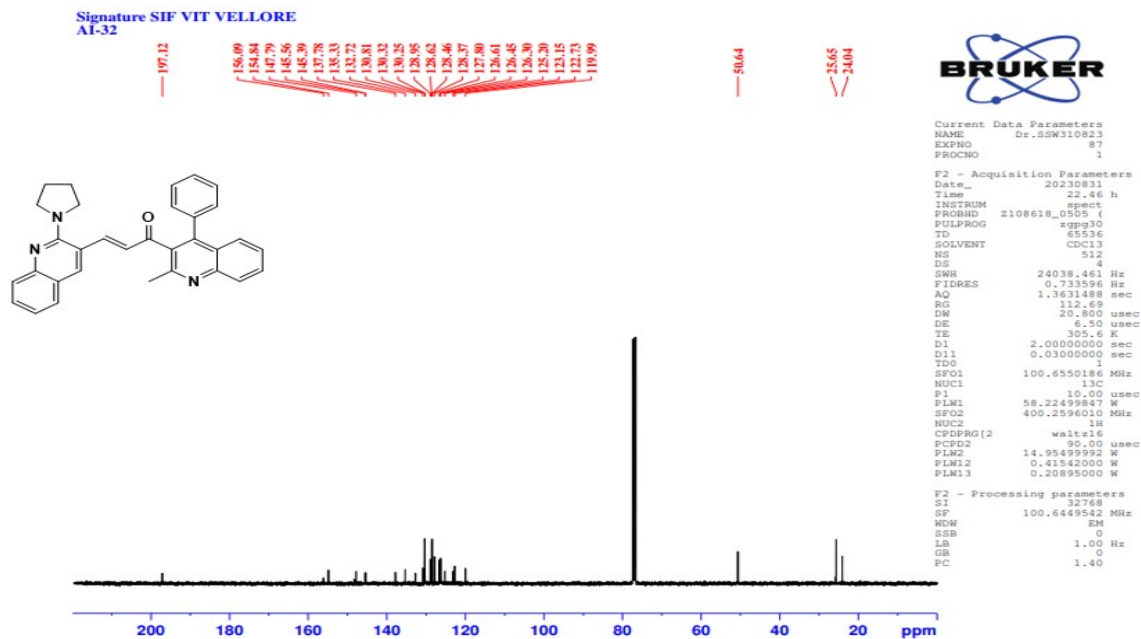

Figure S35. The  $^{13}\text{C}$  NMR Spectrum of the compound **28**

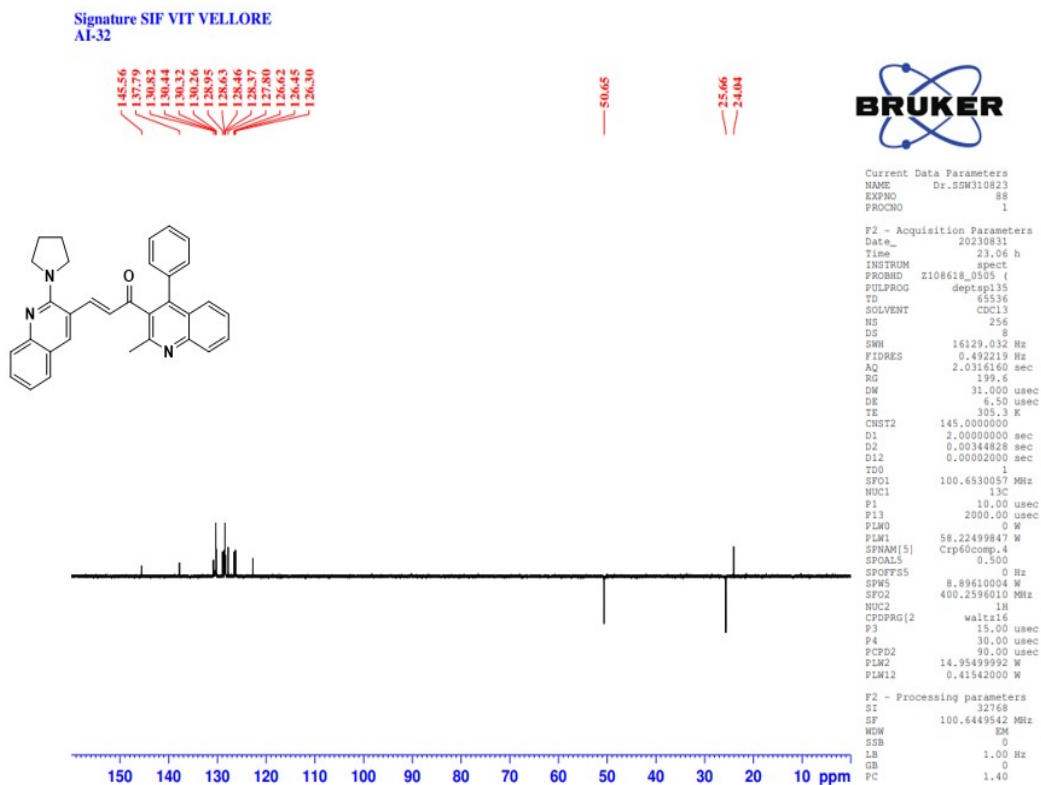

Figure S36. The DEPT-135 Spectrum of the compound **28**

Signature SIF VIT VELLORE  
AI-33

8.083  
7.774  
7.753  
7.721  
7.716  
7.699  
7.693  
7.639  
7.630  
7.600  
7.597  
7.583  
7.579  
7.562  
7.558  
7.386  
7.375  
7.358  
7.352  
7.327  
7.321  
7.316  
7.310  
7.292  
6.498

3.323  
3.299  
3.282  
2.737  
1.844  
1.830  
1.820

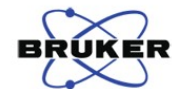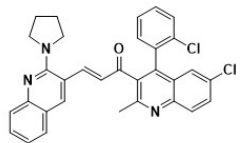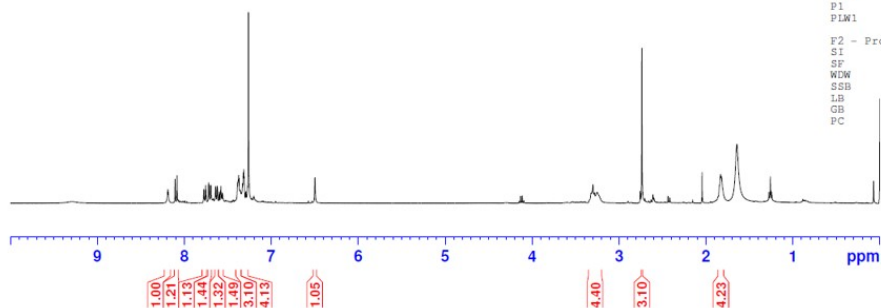

Figure S37. The <sup>1</sup>H NMR Spectrum of the compound **29**

Signature SIF VIT VELLORE  
AI-33

142.96  
137.97  
137.16  
134.24  
131.31  
130.98  
130.68  
130.61  
127.75  
126.55  
125.86  
124.68  
124.59  
122.73  
120.85

50.84  
25.83  
25.65

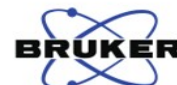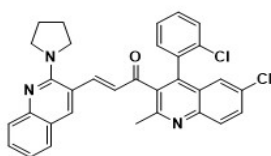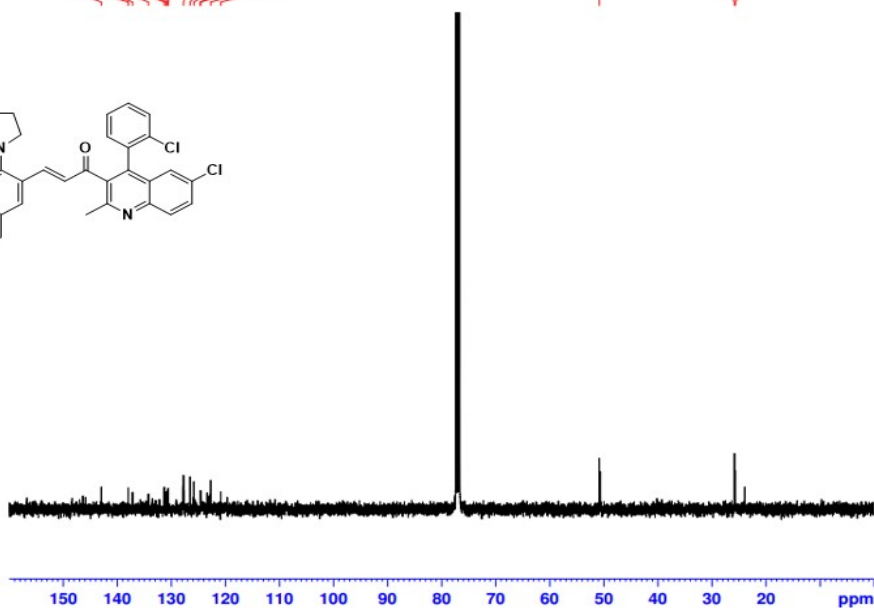

Figure S37. The <sup>13</sup>C NMR Spectrum of the compound **29**

Current Data Parameters  
NAME NMR  
EXNO 14  
PROCNO 1

F2 - Acquisition Parameters  
Date\_ 20231208  
Time 19.56 h  
INSTRUM spect  
PROBHD Z108618\_0505 f  
PULPROG zgpg30  
TD 65536  
SOLVENT CDCl3  
NS 512  
DS 4  
SWH 24038.461 Hz  
FIDRES 0.733596 Hz  
AQ 1.3631488 sec  
RG 199.6  
DW 29.800 usec  
DE 6.50 usec  
TE 304.7 K  
D1 2.0000000 sec  
D11 0.0300000 sec  
TD0 1  
SFO1 100.6550186 MHz  
NUC1 13C  
P1 10.00 usec  
PLW1 56.49300003 W  
SFO2 400.2596010 MHz  
NUC2 1H  
CPDPRG2 waltz16  
PCPD2 90.00 usec  
PLW2 15.21399975 W  
PLW12 0.42261001 W  
PLW13 0.21257000 W

F2 - Processing parameters  
SI 32768  
SF 100.6449542 MHz  
WDW EM  
SSB 0  
LB 1.00 Hz  
GB 0  
PC 1.40

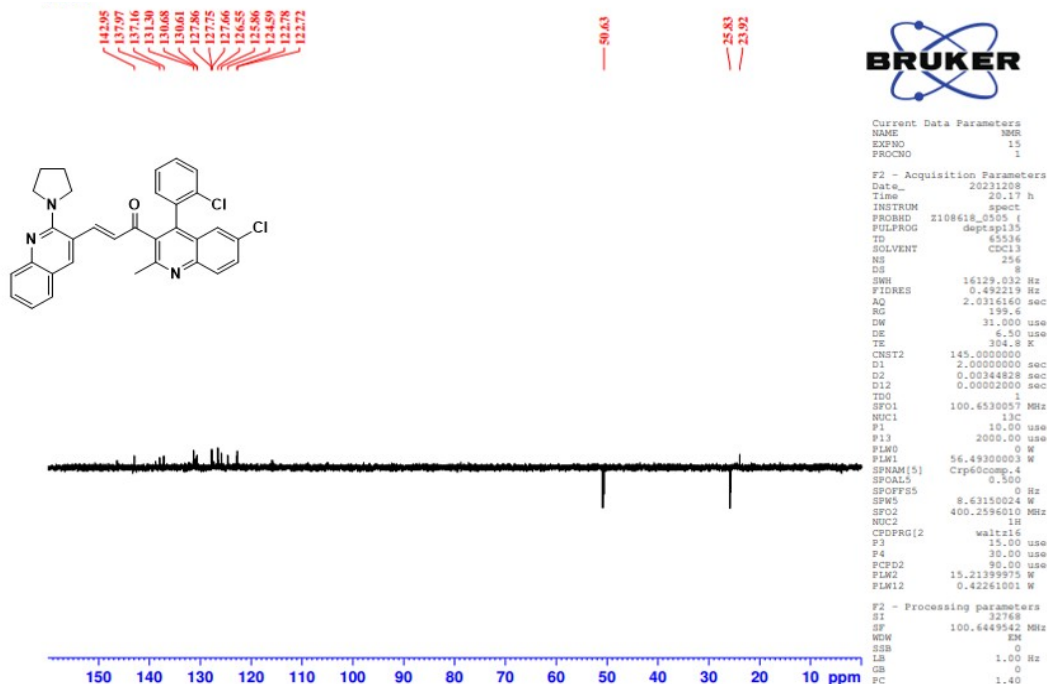

Figure S39. The DEPT-135 Spectrum of the compound 29

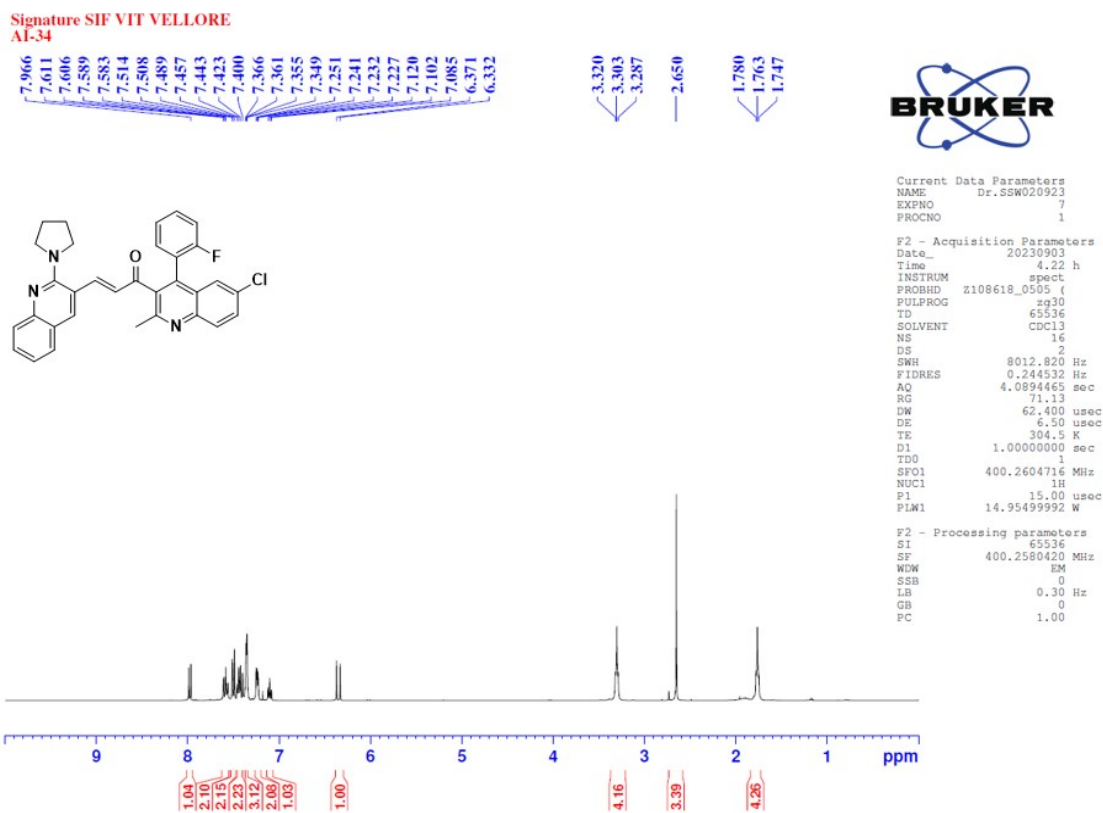

Figure S40. The <sup>1</sup>H NMR Spectrum of the compound 30

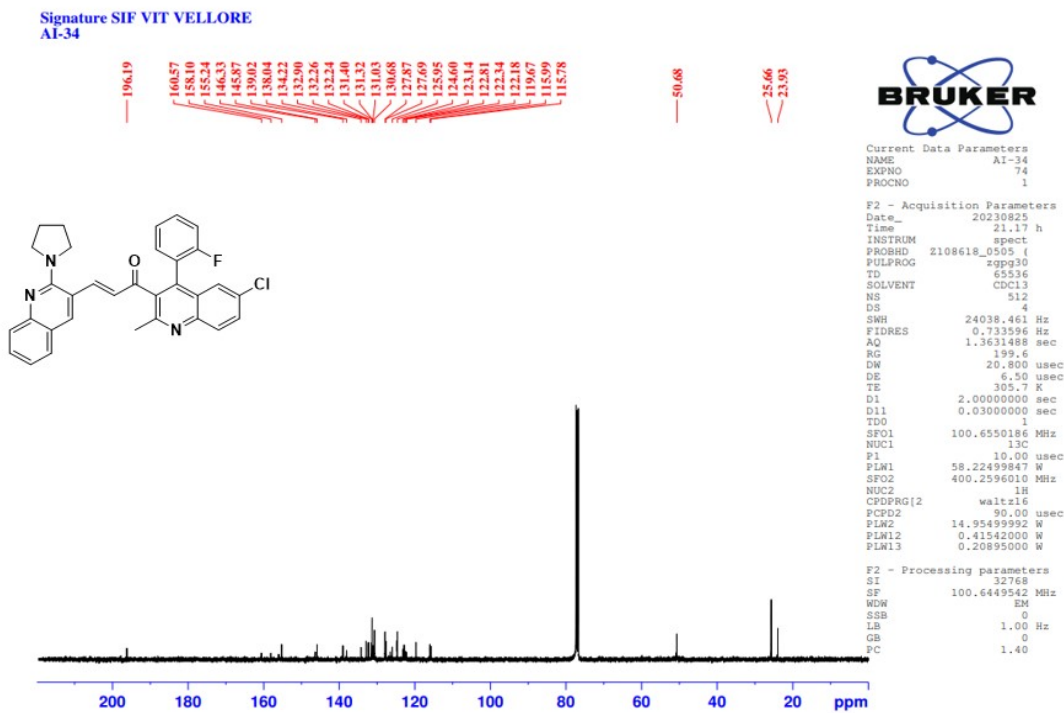

Figure S41. The  $^{13}\text{C}$  NMR Spectrum of the compound **30**

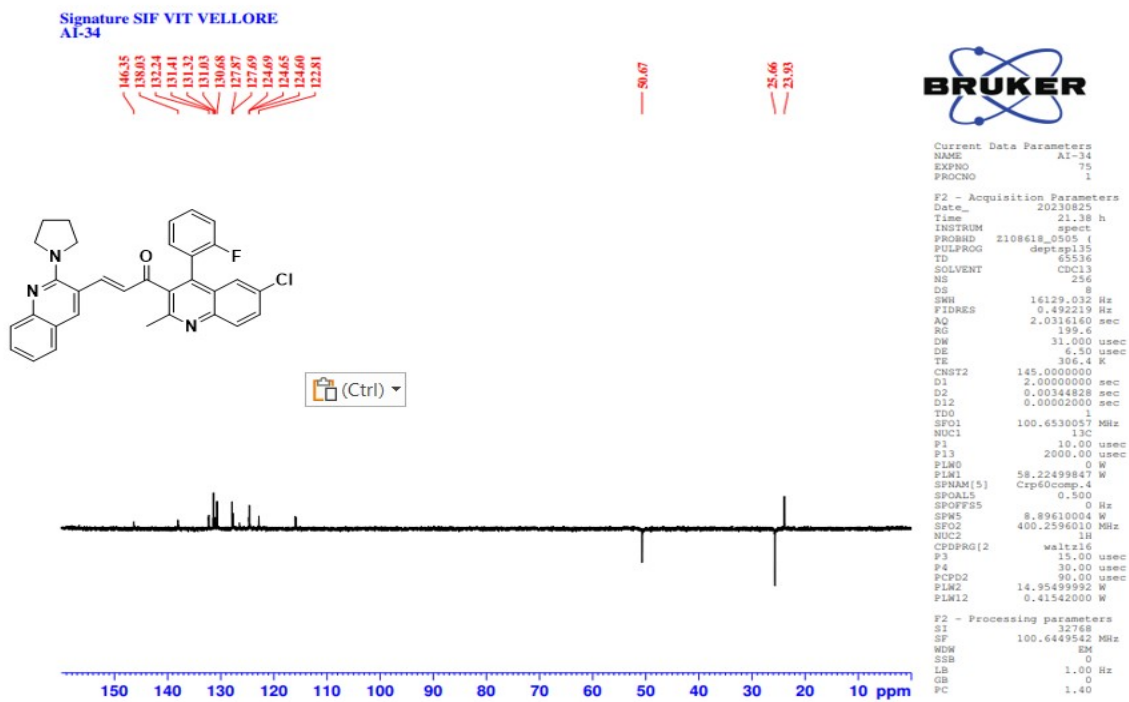

Figure S42. The DEPT-135 Spectrum of the compound **30**

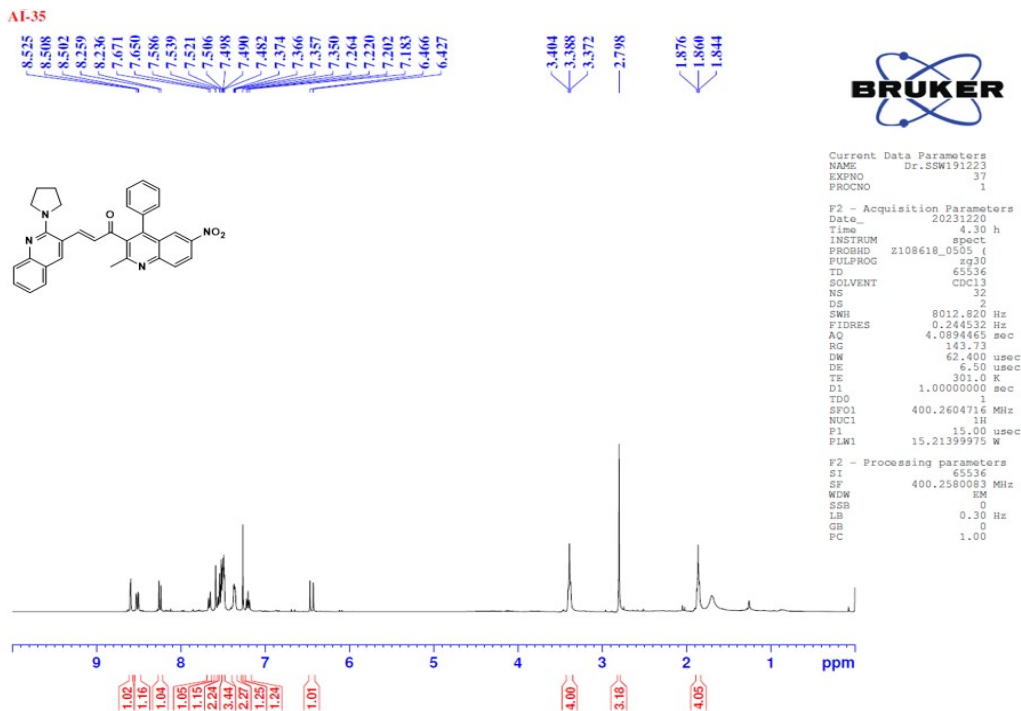

Figure S43. The  $^1\text{H}$  NMR Spectrum of the compound **31**

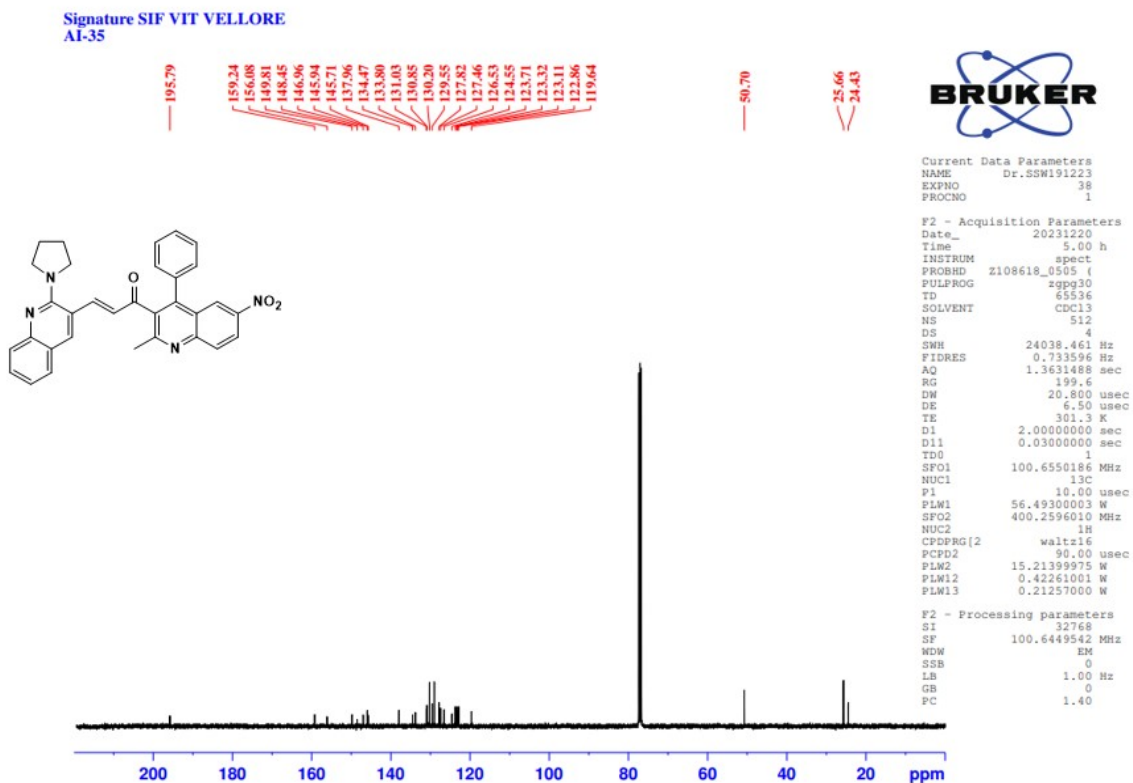

Figure S44. The  $^{13}\text{C}$  NMR Spectrum of the compound **31**



Signature SIF VIT VELLORE  
AI-35

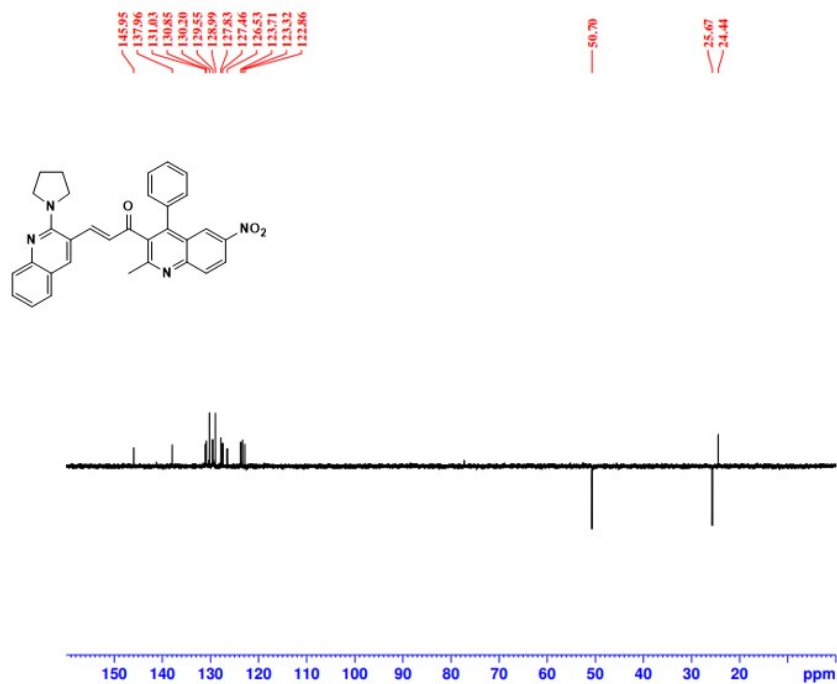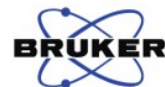

Current Data Parameters  
NAME Dr.SSW191223  
EXPNO 39  
PROCNO 1

F2 - Acquisition Parameters  
Date\_ 20231220  
Time 5.21 h  
INSTRUM spect  
PROBHD Z108618\_0505 ( )  
PULPROG deptspl35  
TD 65536  
SOLVENT CDCl3  
NS 256  
DS 8  
SWH 16129.032 Hz  
FIDRES 0.492219 Hz  
AQ 2.0116160 sec  
RG 199.6  
DW 31.000 usec  
DE 6.50 usec  
TE 301.0 K  
CHST2 145.0000000  
D1 2.0000000 sec  
D2 0.00344828 sec  
D12 0.00002000 sec  
TDO 1  
SFO1 100.6530057 MHz  
NUC1 13C  
P1 10.00 usec  
P13 2000.00 usec  
PLW0 0 W  
PLM1 56.49300003 W  
SPNAM(5) Crp60comp.4  
SFOAL5 0.500  
SFOFF5 0 Hz  
SPW5 8.63150024 W  
SFO2 400.2596010 MHz  
NUC2 1H  
CPDPRG2 waltz16  
P3 15.00 usec  
P4 30.00 usec  
PCPD2 90.00 usec  
PLW2 15.21399975 W  
PLM2 0.42261001 W

F2 - Processing parameters  
SI 32768  
SF 100.6449542 MHz  
WDW EM  
SSB 0  
LB 1.00 Hz  
GB 0  
PC 1.40

Figure S45. The DEPT-135 Spectrum of the compound 31

Signature SIF VIT VELLORE  
AI-41

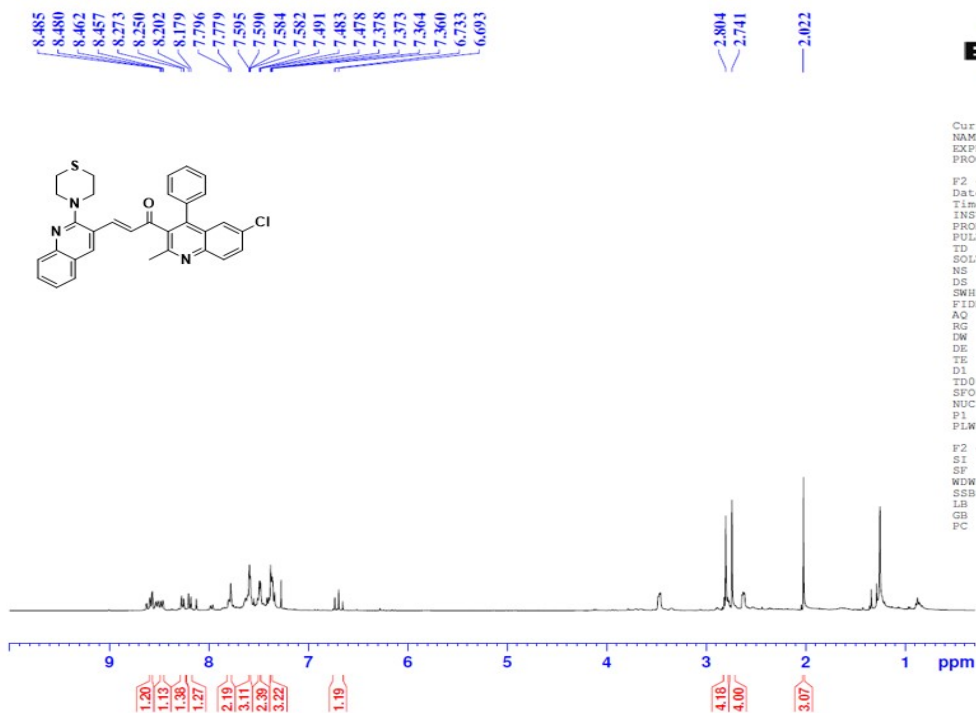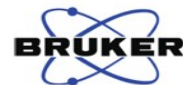

Current Data Parameters  
NAME Dr.SSW300923  
EXPNO 69  
PROCNO 1

F2 - Acquisition Parameters  
Date\_ 20230930  
Time 1.20 h  
INSTRUM spect  
PROBHD Z108618\_0505 ( )  
PULPROG zg30  
TD 65536  
SOLVENT CDCl3  
NS 32  
DS 2  
SWH 8012.820 Hz  
FIDRES 0.244532 Hz  
AQ 4.0894465 sec  
RG 71.13  
DW 62.400 usec  
DE 6.50 usec  
TE 305.7 K  
TDO 1  
SFO1 400.2604716 MHz  
NUC1 1H  
P1 15.00 usec  
PLW1 14.95499992 W

F2 - Processing parameters  
SI 65536  
SF 400.2580041 MHz  
WDW EM  
SSB 0  
LB 0.30 Hz  
GB 0  
PC 1.00

Figure S46. The <sup>1</sup>H NMR Spectrum of the compound 32

Signature SIF VIT VELLORE  
AI-41

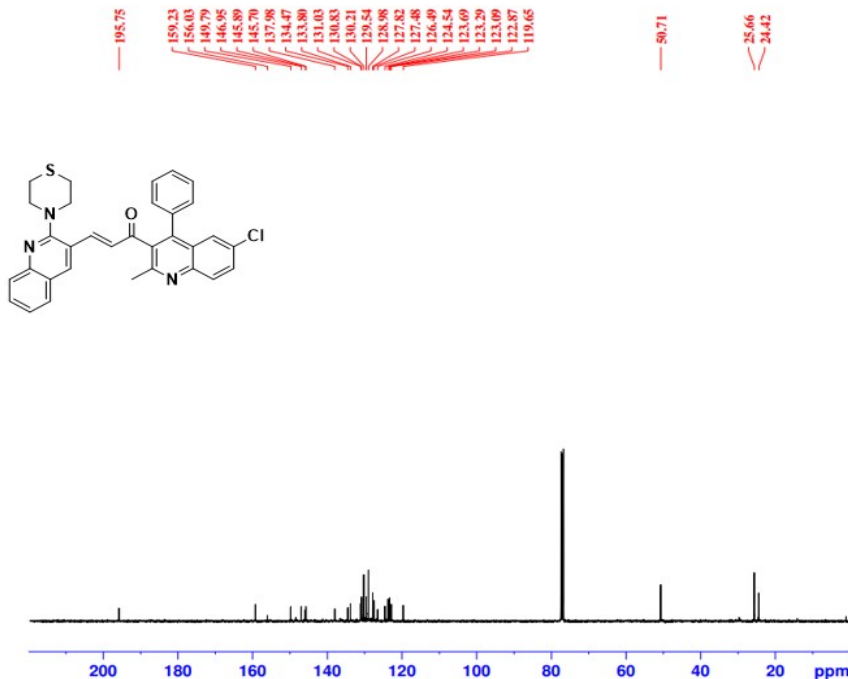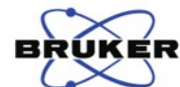

Current Data Parameters  
NAME AI-41  
EXPNO 64  
PROCNO 1

F2 - Acquisition Parameters  
Date\_ 20230823  
Time 2.20 h  
INSTRUM spect  
PROBHD Z108618\_0505 ( )  
PULPROG zgpg30  
TD 65536  
SOLVENT CDC13  
NS 512  
DS 4  
SWH 24038.461 Hz  
FIDRES 0.733596 Hz  
AQ 1.3631488 sec  
RG 199.6  
DW 20.800 usec  
DE 6.50 usec  
TE 306.4 K  
D1 2.0000000 sec  
D11 0.0300000 sec  
TD0 1  
SFO1 100.6550186 MHz  
NUC1 13C  
P1 10.00 usec  
PLW1 58.22499847 W  
SFO2 400.2596010 MHz  
NUC2 1H  
CPDPRG2 waltz16  
PCPD2 90.00 usec  
PLW2 14.95499992 W  
PLW12 0.41542000 W  
PLW13 0.20895000 W

F2 - Processing parameters  
SI 32768  
SF 100.6449542 MHz  
WDW EM  
SSB 0  
LB 1.00 Hz  
GB 0  
PC 1.40

Figure S47. The  $^{13}\text{C}$  NMR Spectrum of the compound **32**

Signature SIF VIT VELLORE  
AI-41

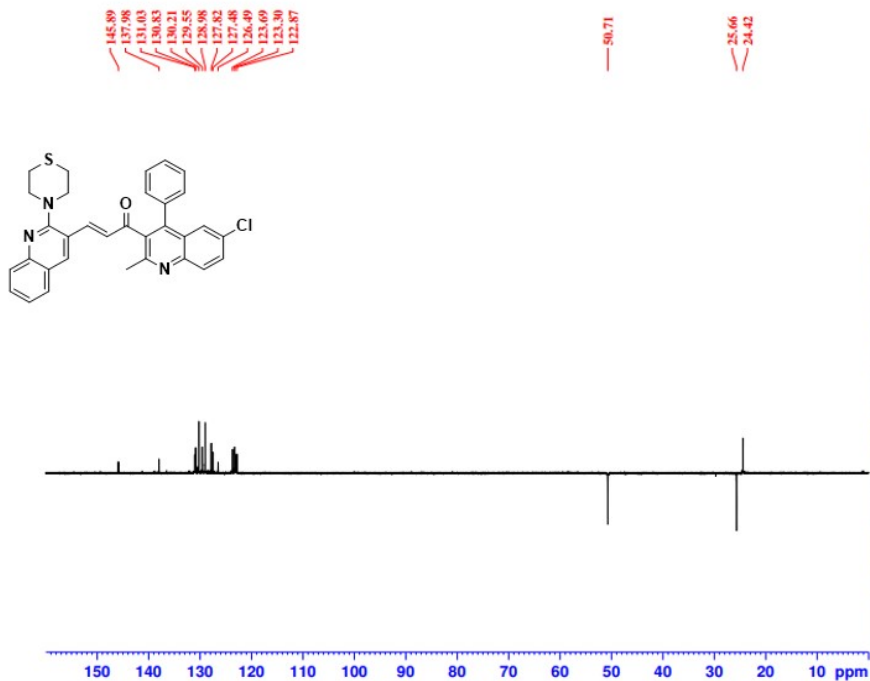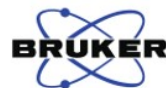

Current Data Parameters  
NAME AI-41  
EXPNO 65  
PROCNO 1

F2 - Acquisition Parameters  
Date\_ 20230823  
Time 2.40 h  
INSTRUM spect  
PROBHD Z108618\_0505 ( )  
PULPROG zgpg30  
SOLVENT CDC13  
NS 256  
DS 4  
SWH 16129.032 Hz  
FIDRES 0.492219 Hz  
AQ 2.0316160 sec  
RG 199.6  
DW 31.000 usec  
DE 6.50 usec  
TE 306.2 K  
CNST2 145.0000000  
D1 2.0000000 sec  
D2 0.00344828 sec  
D12 0.00002000 sec  
TD0 1  
SFO1 100.6530057 MHz  
NUC1 13C  
P1 10.00 usec  
PLW1 58.22499847 W  
SFO2 400.2596010 MHz  
NUC2 1H  
CPDPRG2 waltz16  
F3 15.00 usec  
F4 30.00 usec  
PCPD2 90.00 usec  
PLW2 14.95499992 W  
PLW12 0.41542000 W

F2 - Processing parameters  
SI 32768  
SF 100.6449542 MHz  
WDW EM  
SSB 0  
LB 1.00 Hz  
GB 0  
PC 1.40

Figure S48. The DEPT-135 Spectrum of the compound **32**

Signature SIF VIT VELLORE  
AI-42

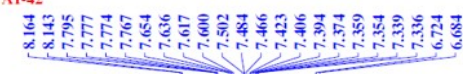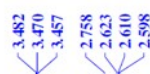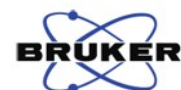

Current Data Parameters  
NAME Dr.SSW141223  
EXPNO 25  
PROCNO 1

F2 - Acquisition Parameters  
Date\_ 20231215  
Time 0.48 h  
INSTRUM spect  
PROBHD Z108618\_0505 ( )  
PULPROG zg30  
TD 65536  
SOLVENT CDC13  
NS 32  
DS 2  
SWH 8012.820 Hz  
FIDRES 0.244532 Hz  
AQ 4.0894465 sec  
RG 156.91  
DW 62.400 usec  
DE 6.50 usec  
TE 301.6 K  
D1 1.00000000 sec  
TDO 1  
SFO1 400.2604716 MHz  
NUC1 1H  
P1 15.00 usec  
PLW1 15.21399975 W

F2 - Processing parameters  
SI 65536  
SF 400.2580088 MHz  
WDW EM  
SSB 0  
LB 0.30 Hz  
GB 0  
PC 1.00

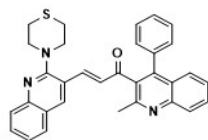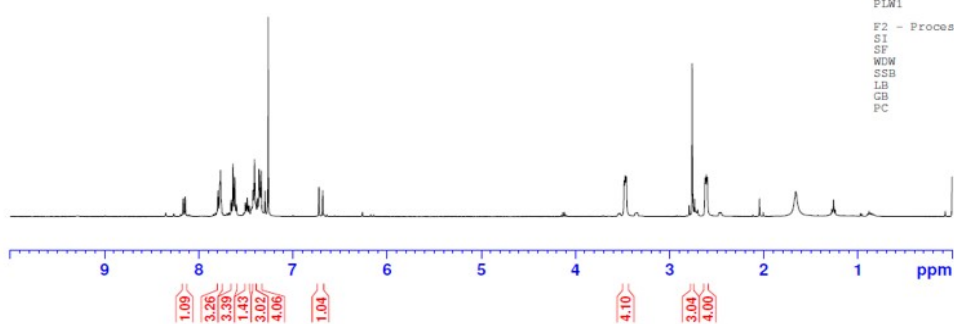

Figure S49. The <sup>1</sup>H NMR Spectrum of the compound **33**

Signature SIF VIT VELLORE  
AI-42

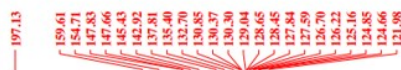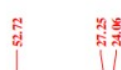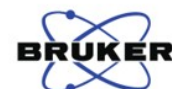

Current Data Parameters  
NAME Dr.SSW141223  
EXPNO 26  
PROCNO 1

F2 - Acquisition Parameters  
Date\_ 20231215  
Time 1.19 h  
INSTRUM spect  
PROBHD Z108618\_0505 ( )  
PULPROG zgpg30  
TD 65536  
SOLVENT CDC13  
NS 512  
DS 4  
SWH 24038.461 Hz  
FIDRES 0.733596 Hz  
AQ 1.3631488 sec  
RG 175.97  
DW 20.800 usec  
DE 6.50 usec  
TE 302.2 K  
D1 2.00000000 sec  
D11 0.03000000 sec  
TDO 1  
SFO1 100.6550186 MHz  
NUC1 13C  
P1 10.00 usec  
PLM1 56.49300003 W  
SFO2 400.2596010 MHz  
NUC2 1H  
CPDPRG2 waltz16  
PCPD2 90.00 usec  
PLM2 15.21399975 W  
PLM12 0.42261001 W  
PLM13 0.21257000 W

F2 - Processing parameters  
SI 32768  
SF 100.6449542 MHz  
WDW EM  
SSB 0  
LB 1.00 Hz  
GB 0  
PC 1.40

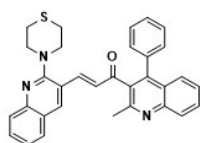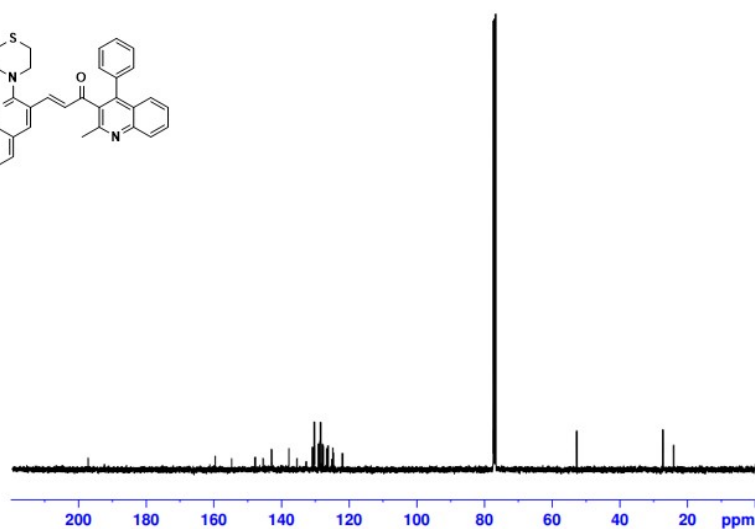

Figure S50. The <sup>13</sup>C NMR Spectrum of the compound **33**

Signature SIF VIT VELLORE  
AI-42

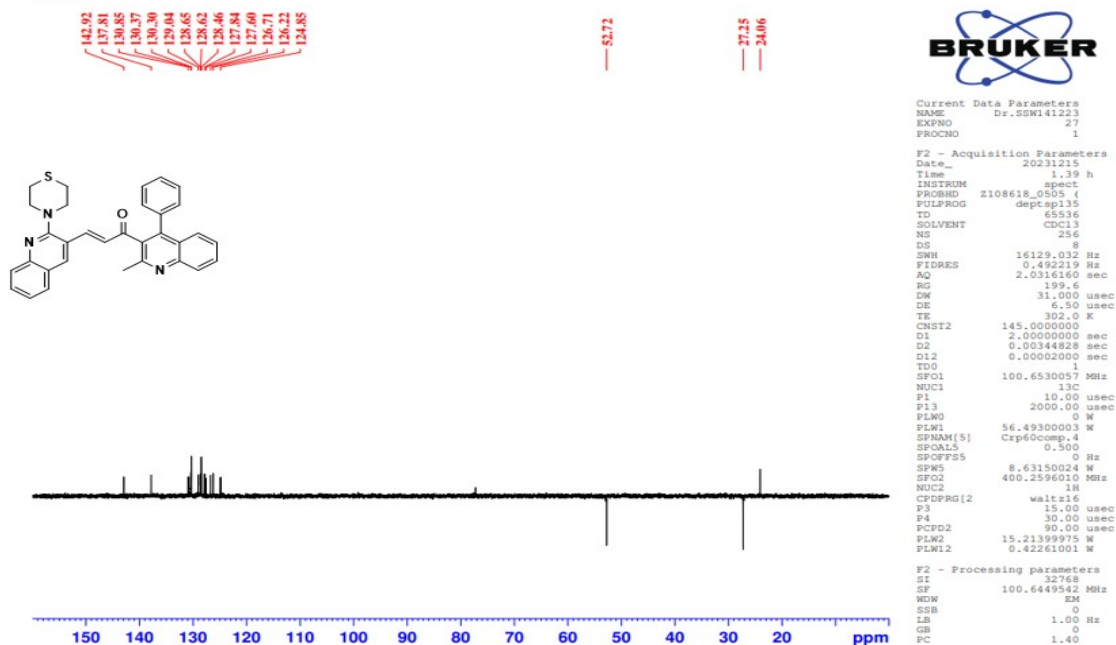

Figure S51. The DEPT-135 Spectrum of the compound **33**

Signature SIF VIT VELLORE  
AI-43

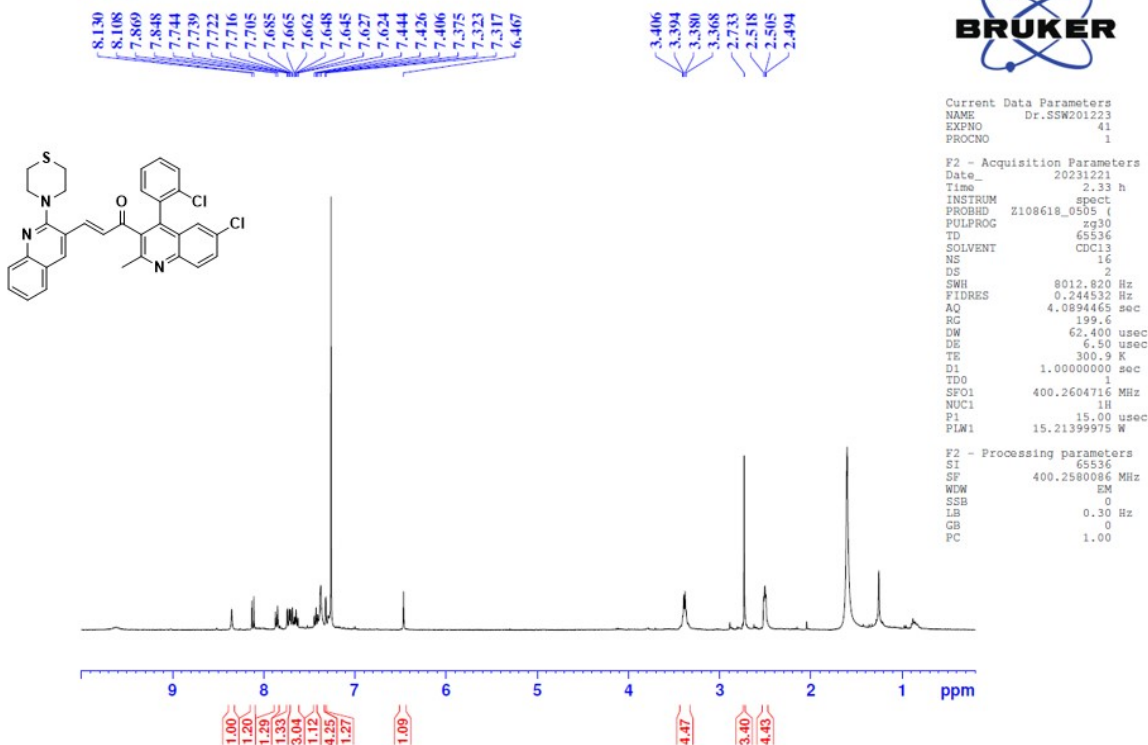

Figure S52. The <sup>1</sup>H NMR Spectrum of the compound **34**

Signature SIF VIT VELLORE  
AI-43

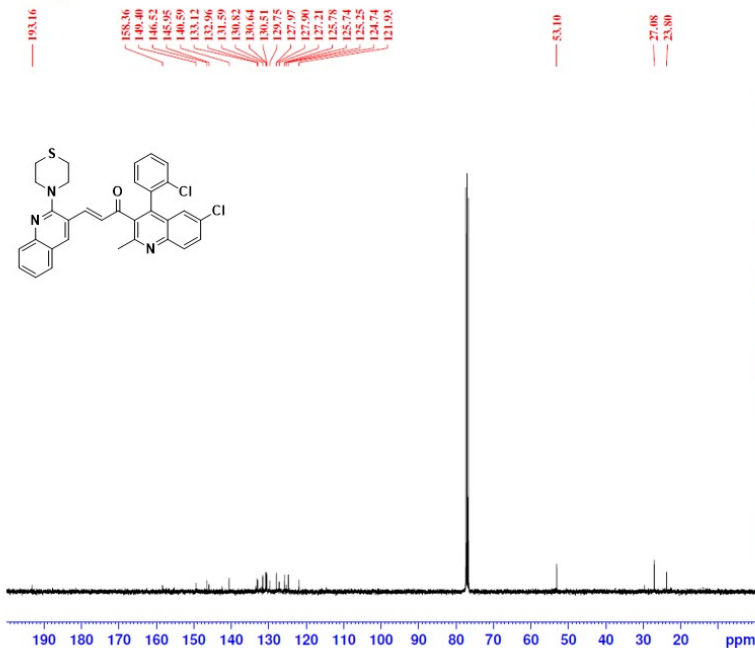

Figure S53. The  $^{13}\text{C}$  NMR Spectrum of the compound **34**

Signature SIF VIT VELLORE  
AI-43

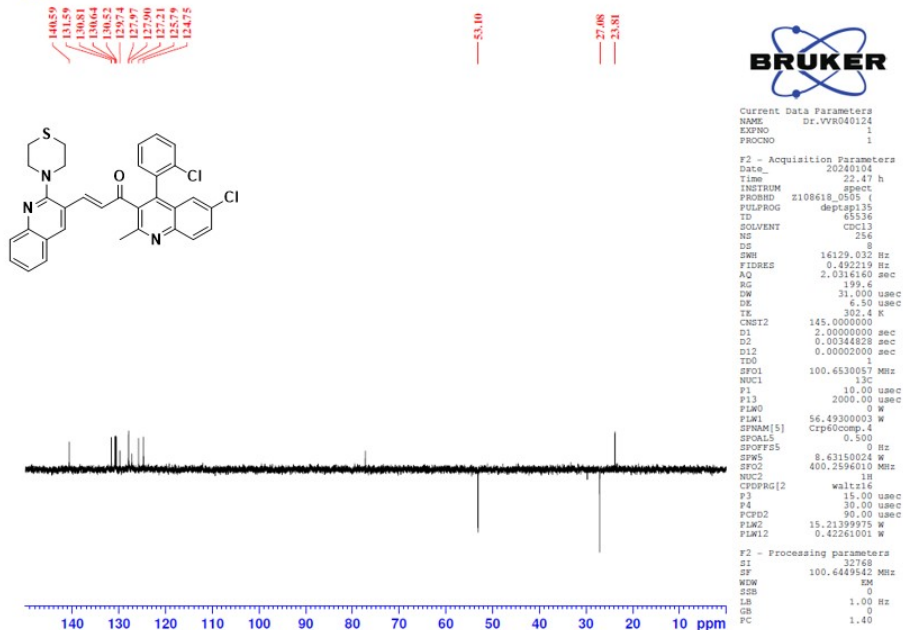

Figure S54. The DEPT-135 Spectrum of the compound **34**

Signature SIF VIT VELLO35  
35

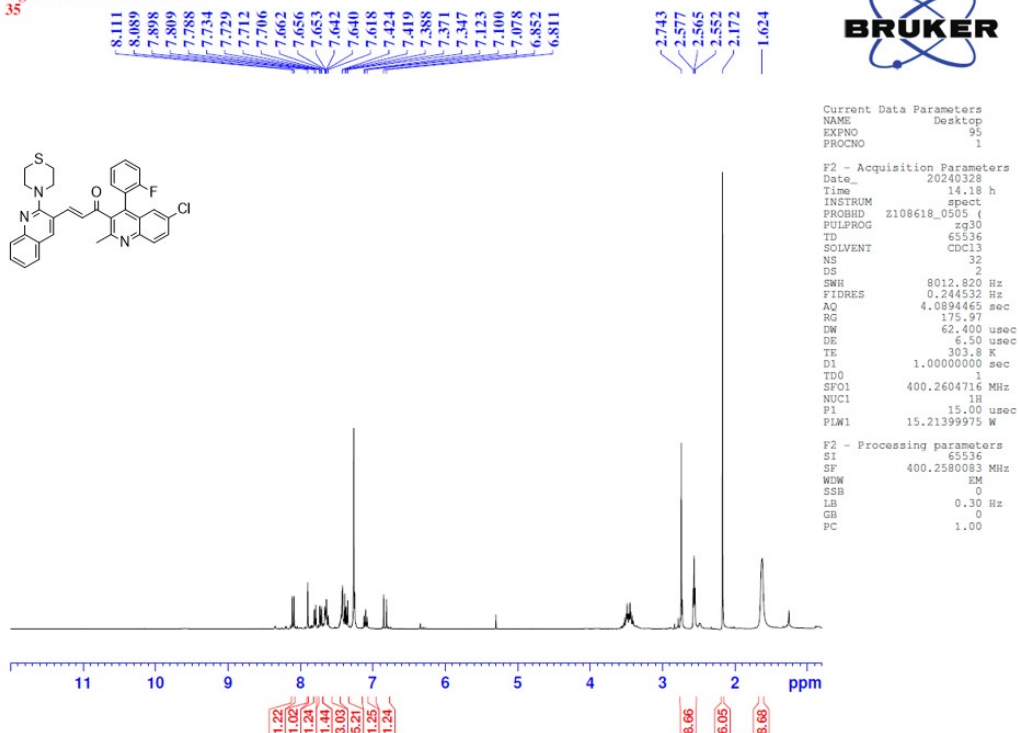

Figure S55. The <sup>1</sup>H NMR Spectrum of the compound **35**

Signature SIF VIT VELLORE  
Al-44

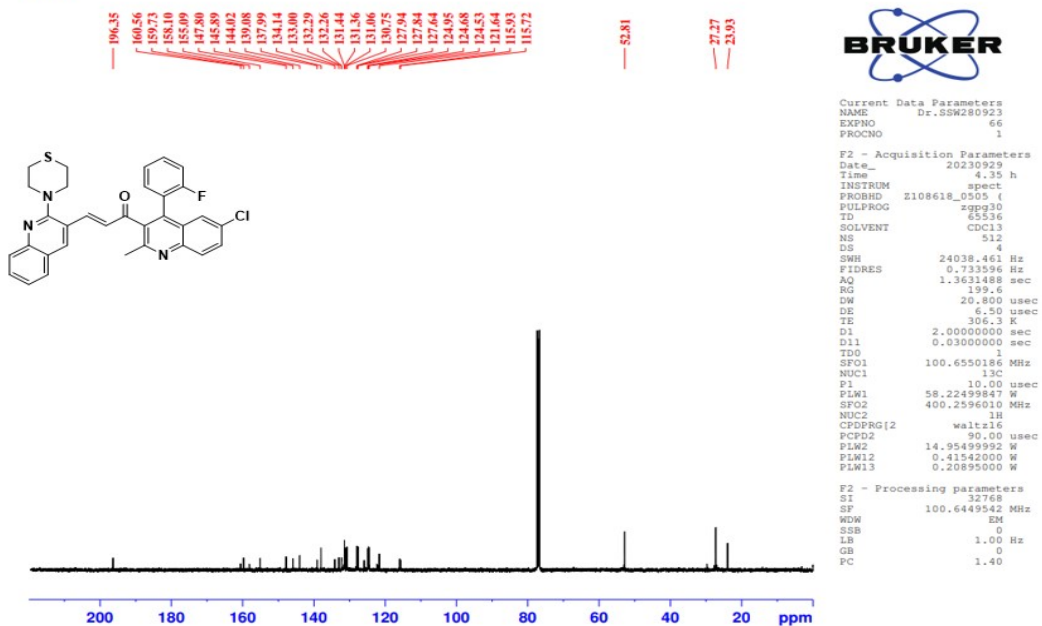

Figure S56. The <sup>13</sup>C NMR Spectrum of the compound **35**

Signature SIF VIT VELLORE  
AI-44

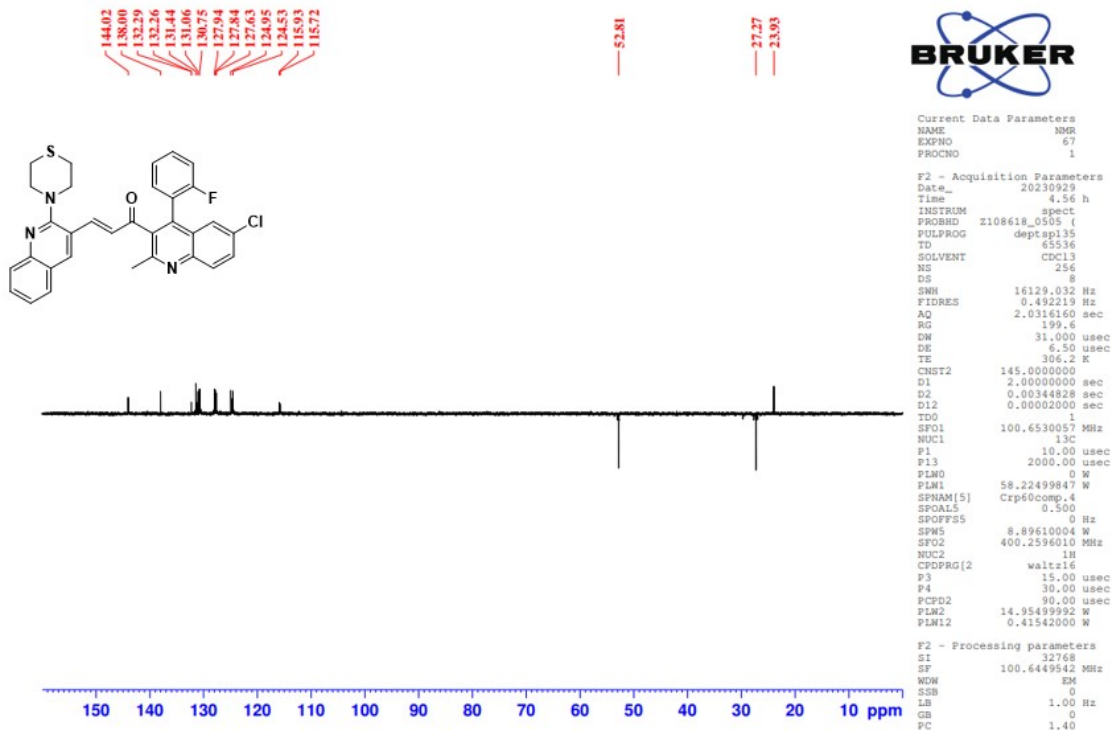

Figure S57. The DEPT-135 Spectrum of the compound **35**

Signature SIF VIT VELLORE  
AI-45

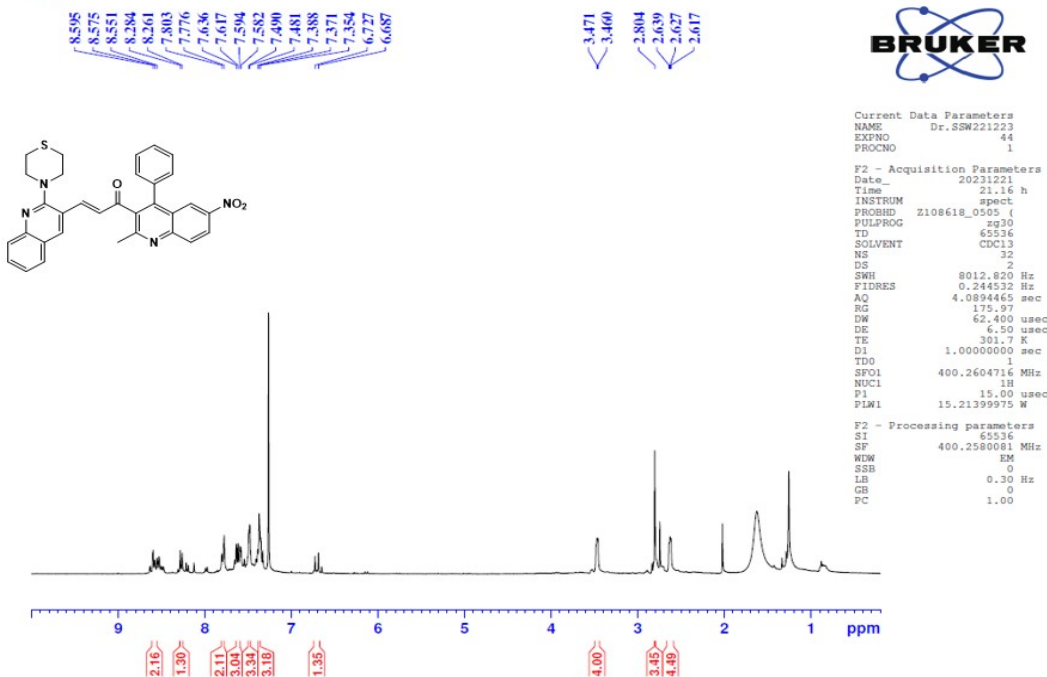

Figure S58. The  $^1\text{H}$  NMR Spectrum of the compound **36**

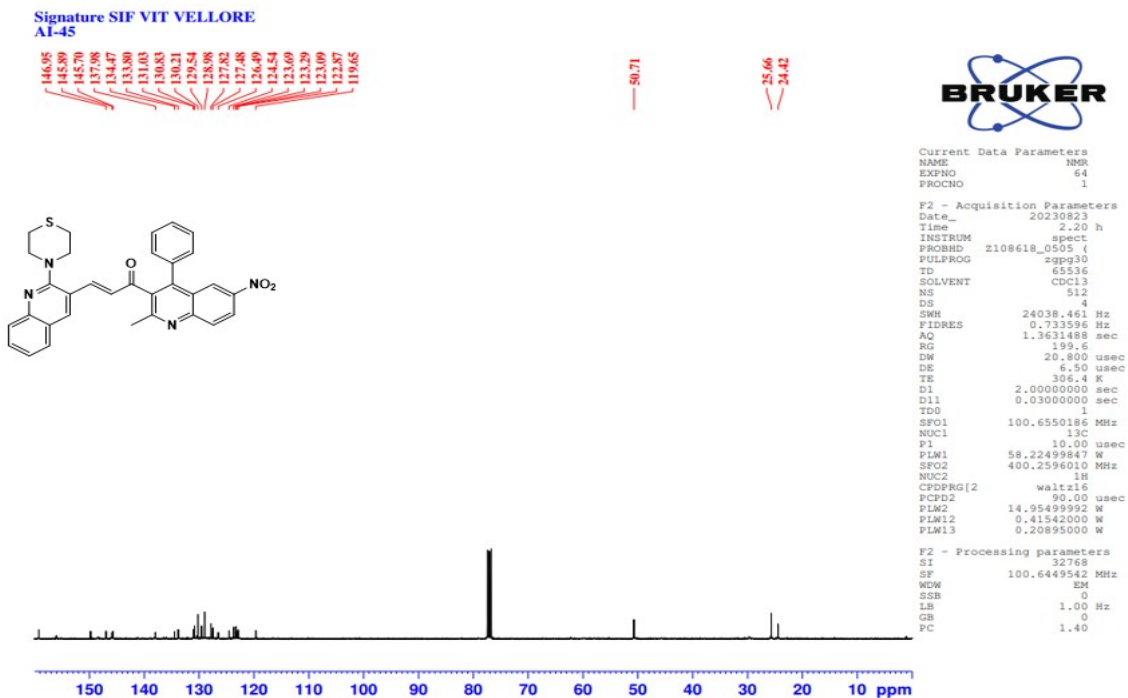

Figure S59. The  $^{13}\text{C}$  NMR Spectrum of the compound **36**

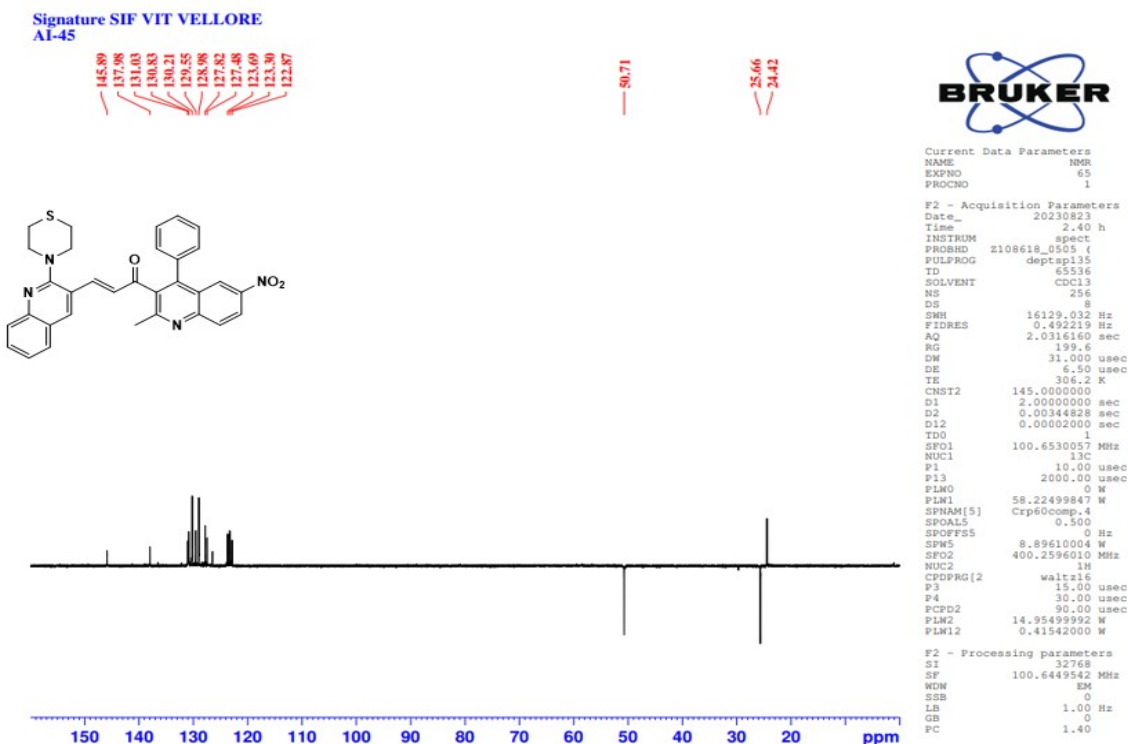

Figure S60. The DEPT-135 Spectrum of the compound **36**



#### 4. HRMS SPECTRA OF COMPOUNDS (17-36)

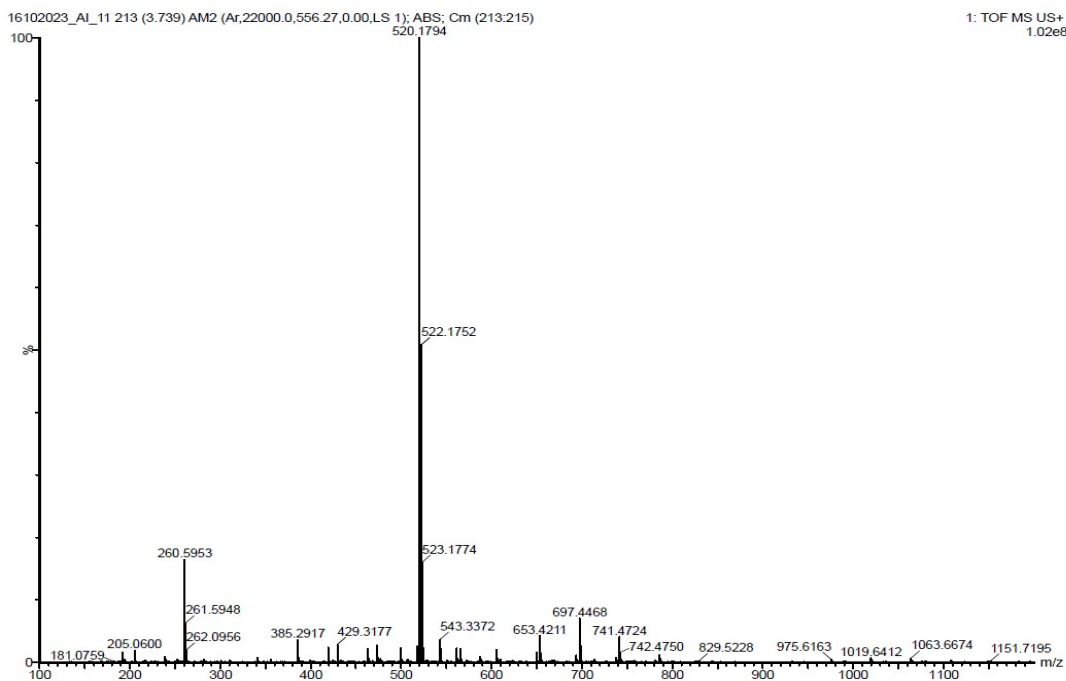

Figure S61. The HRMS spectra of compound **17**

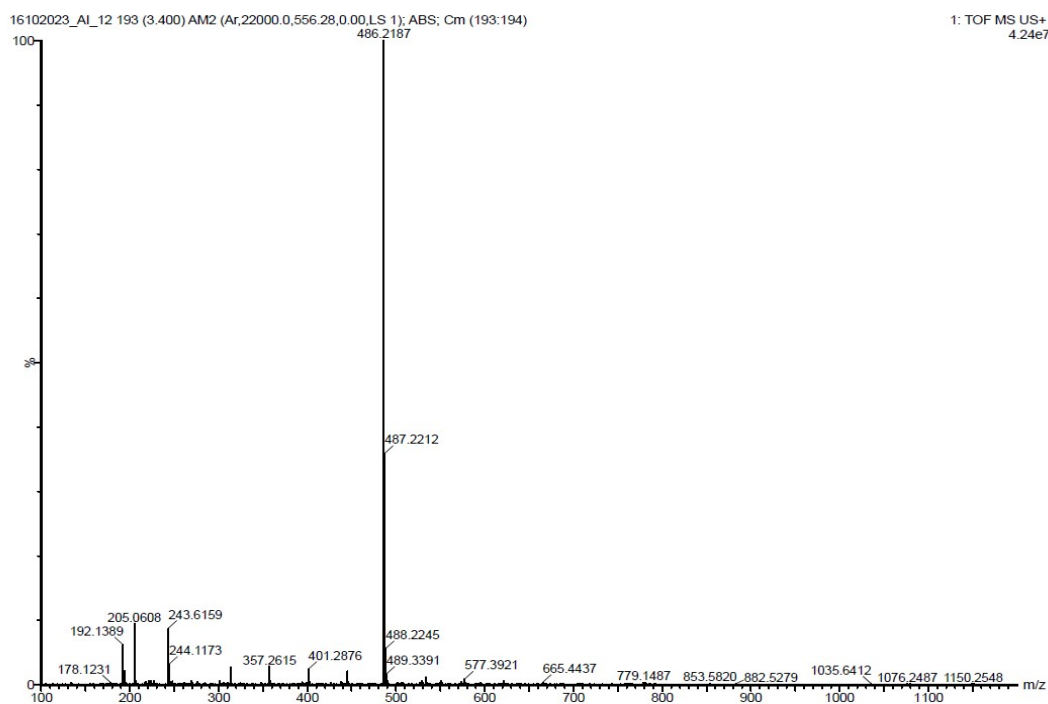

Figure S62. The HRMS spectra of compound **18**

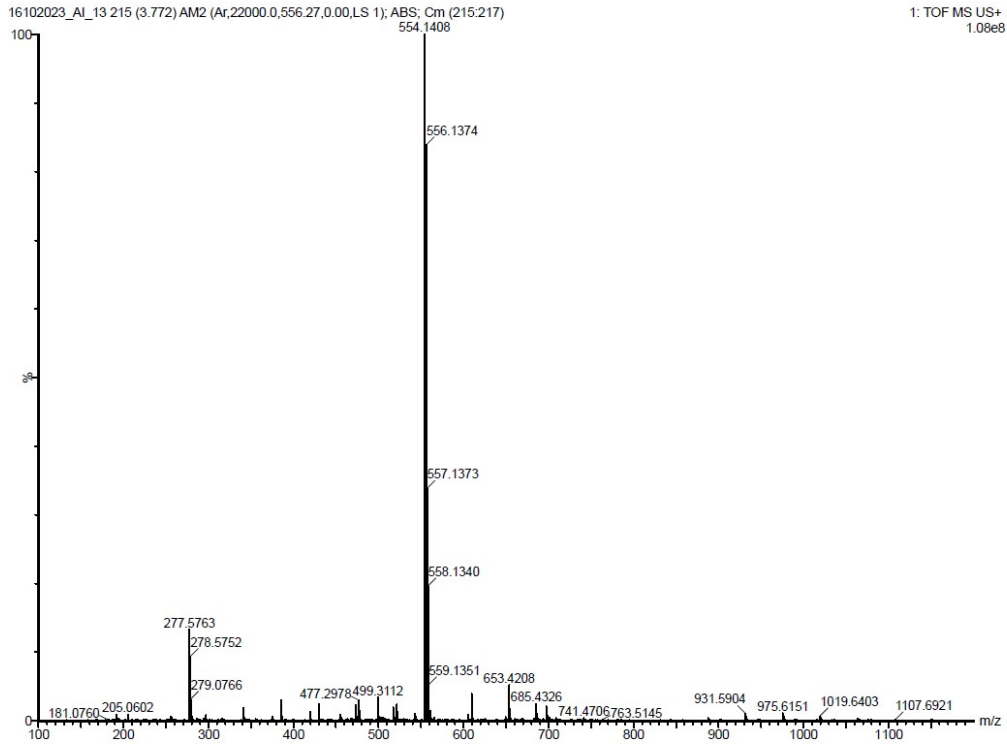

Figure S63. The HRMS spectra of compound **19**

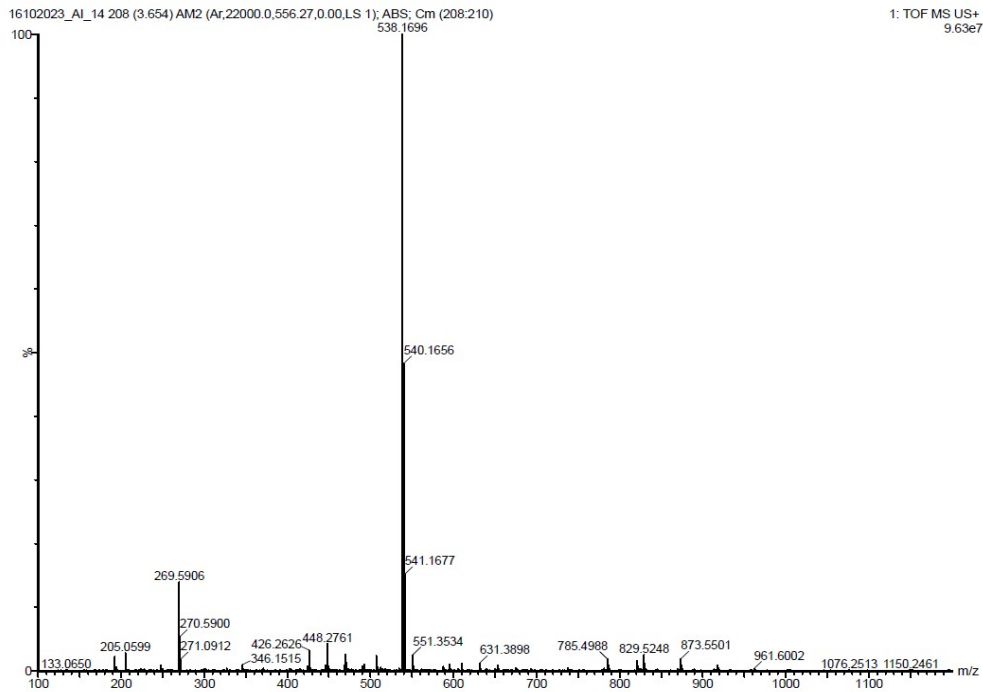

Figure S64. The HRMS spectra of compound **20**

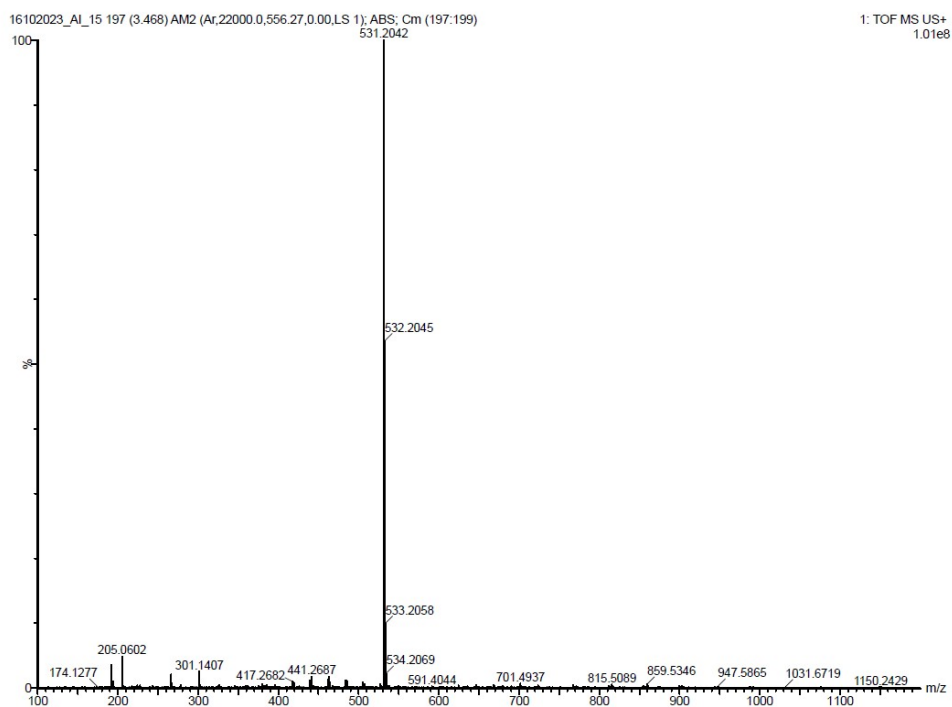

Figure S65. The HRMS spectra of compound **21**

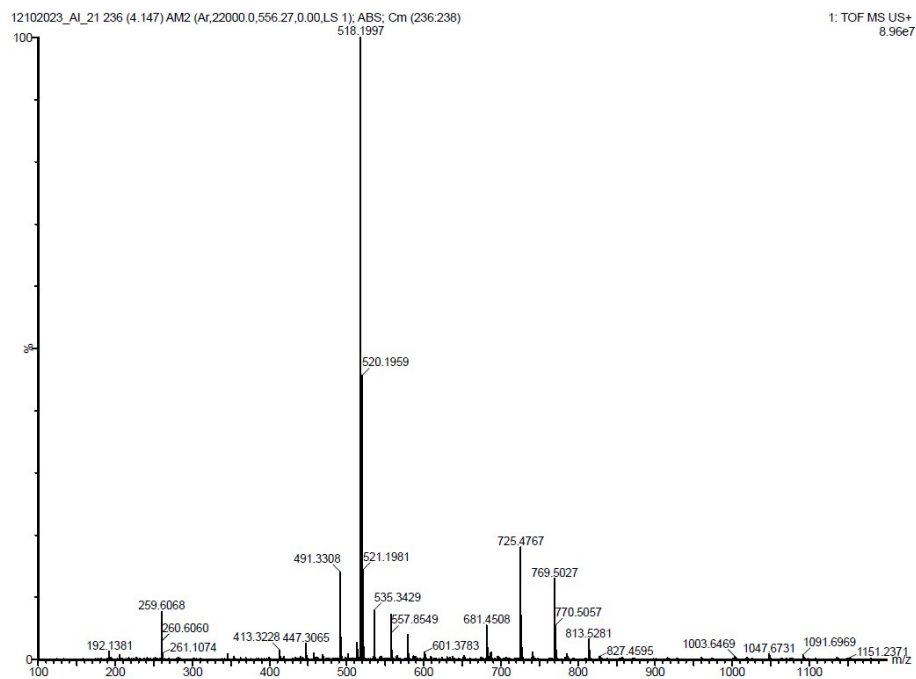

Figure S66. The HRMS spectra of compound **22**

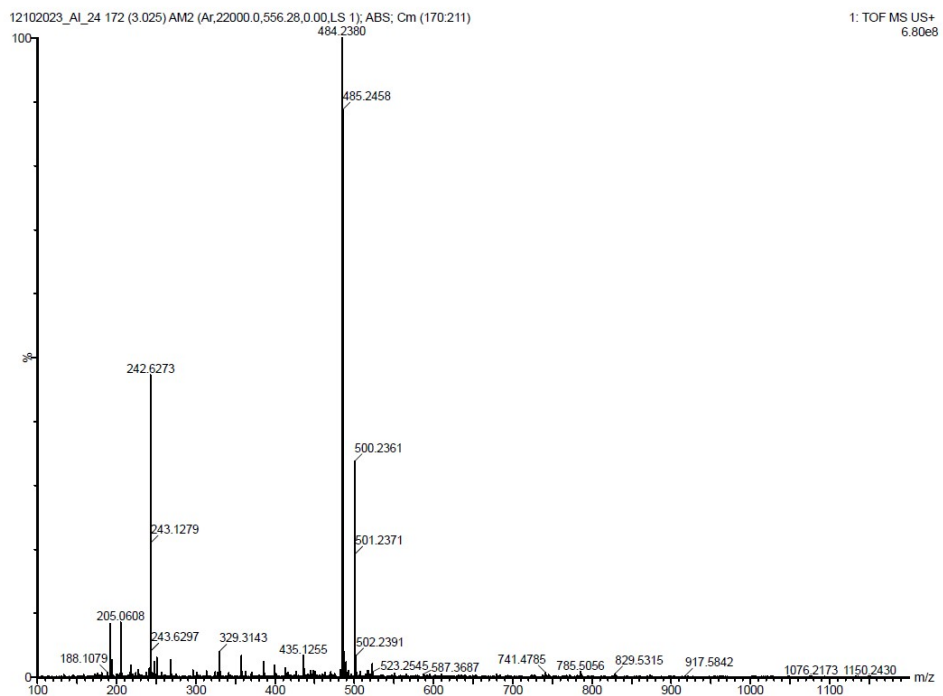

Figure S67. The HRMS spectra of compound **23**

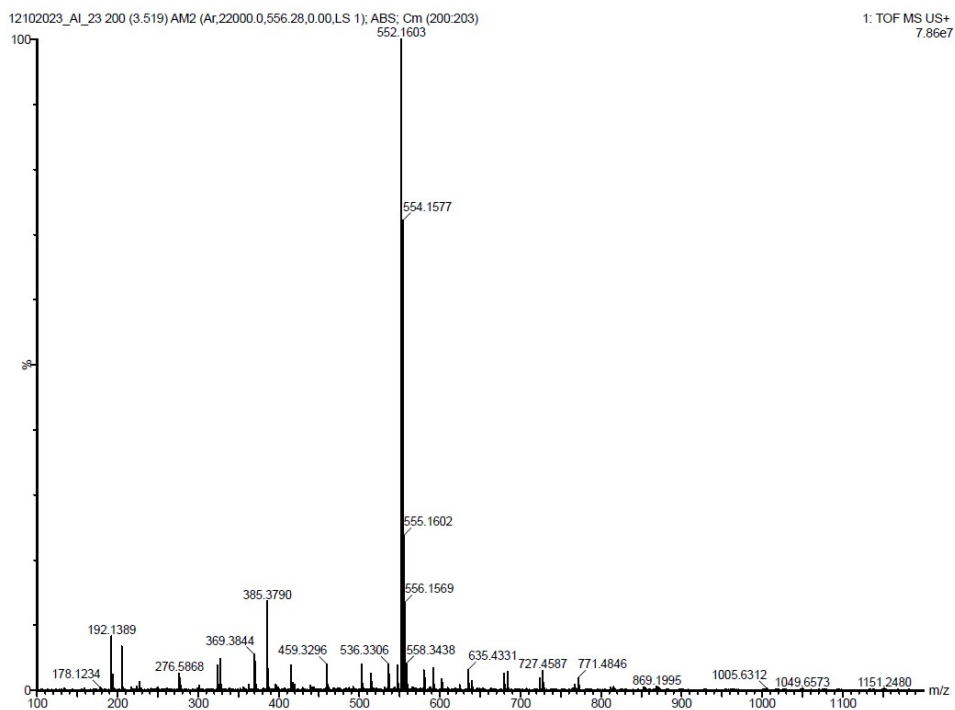

Figure S68. The HRMS spectra of compound **24**

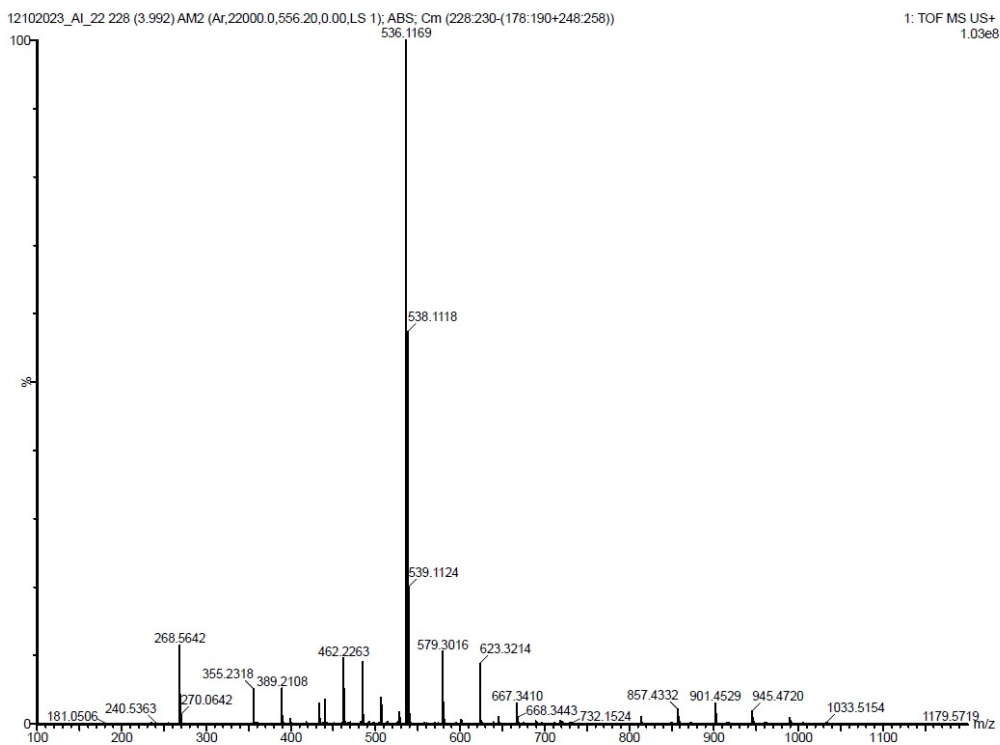

Figure S69. The HRMS spectra of compound **25**

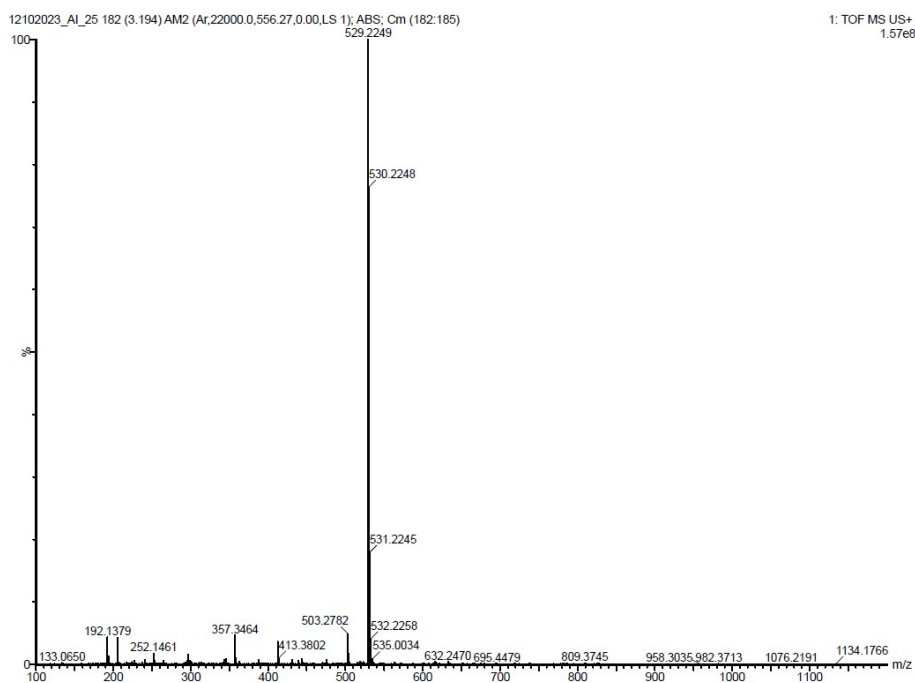

Figure S70. The HRMS spectra of compound **26**

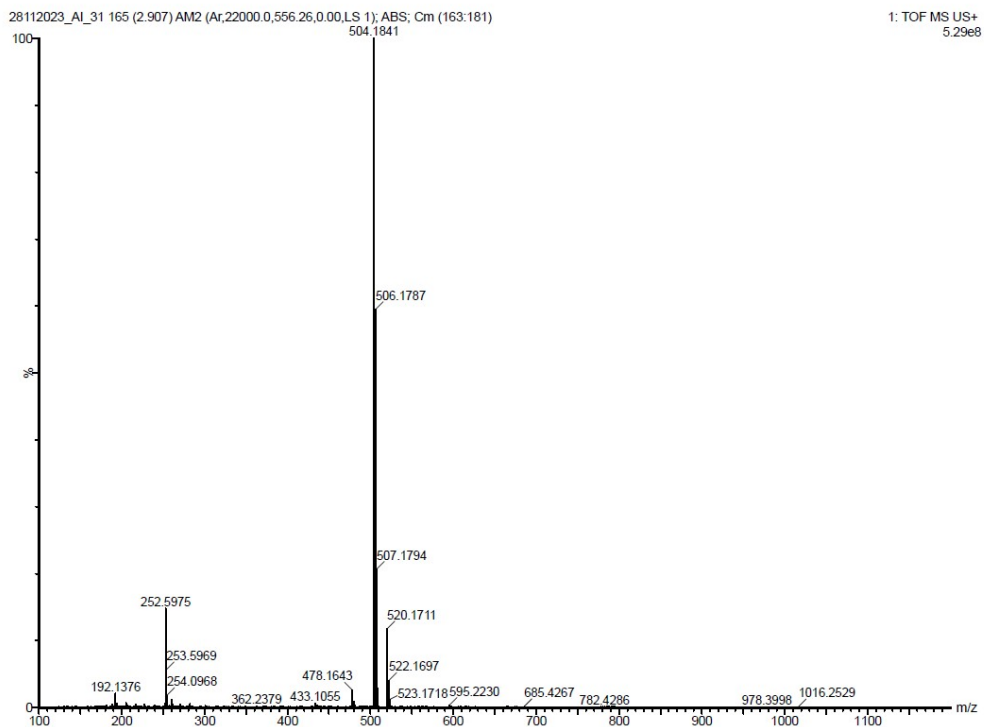

Figure S71. The HRMS spectra of compound **27**

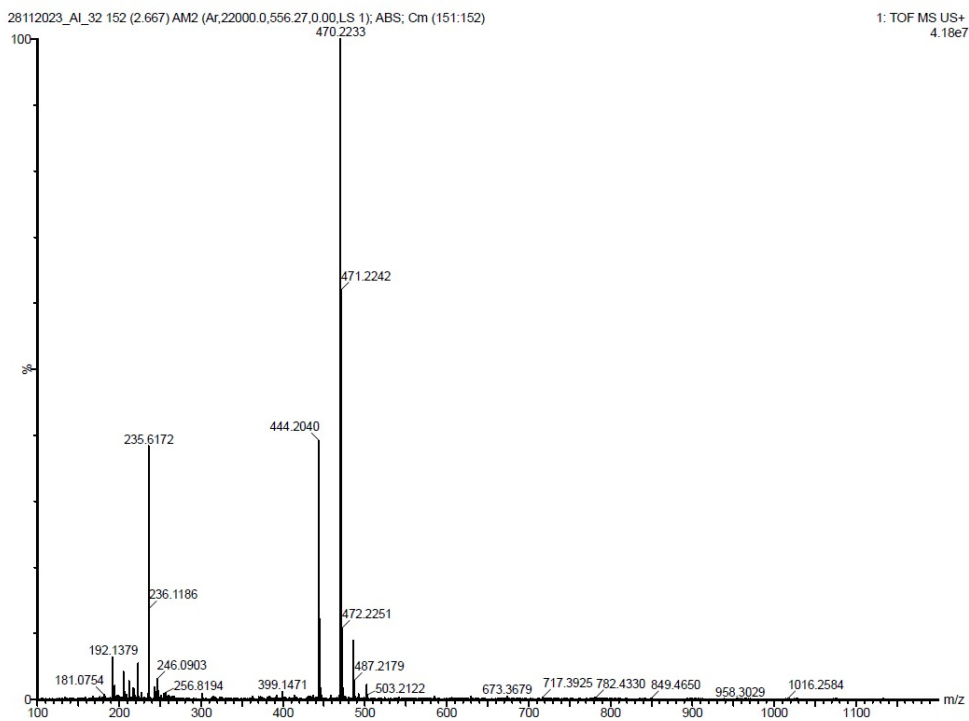

Figure S72. The HRMS spectra of compound **28**

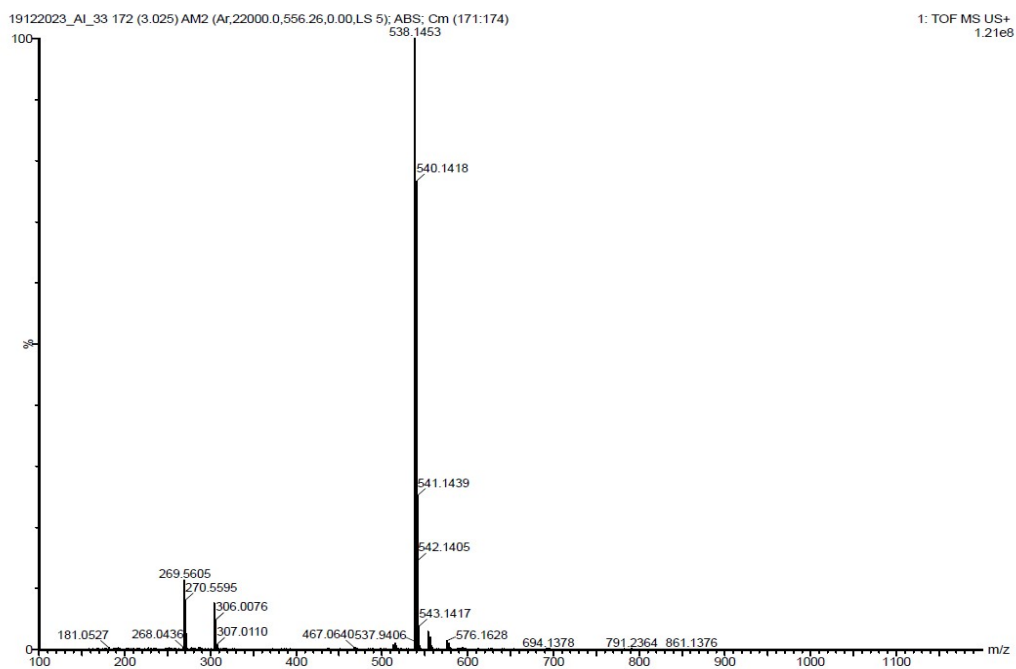

Figure S73. The HRMS spectra of compound **29**

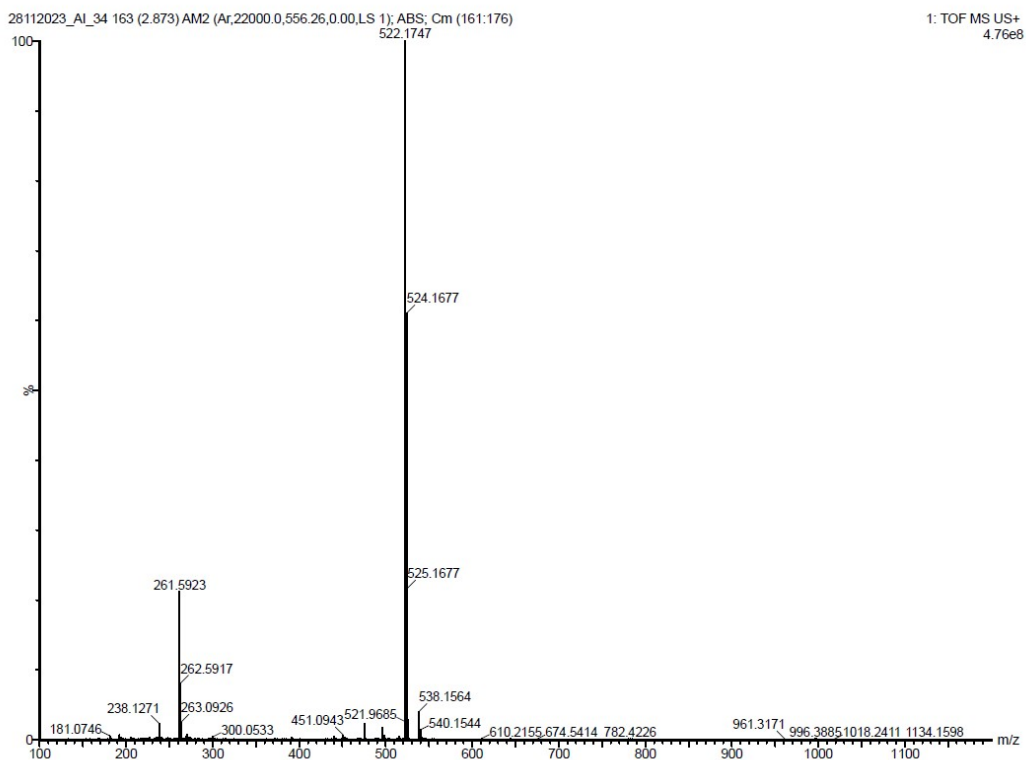

Figure S74. The HRMS spectra of compound **30**

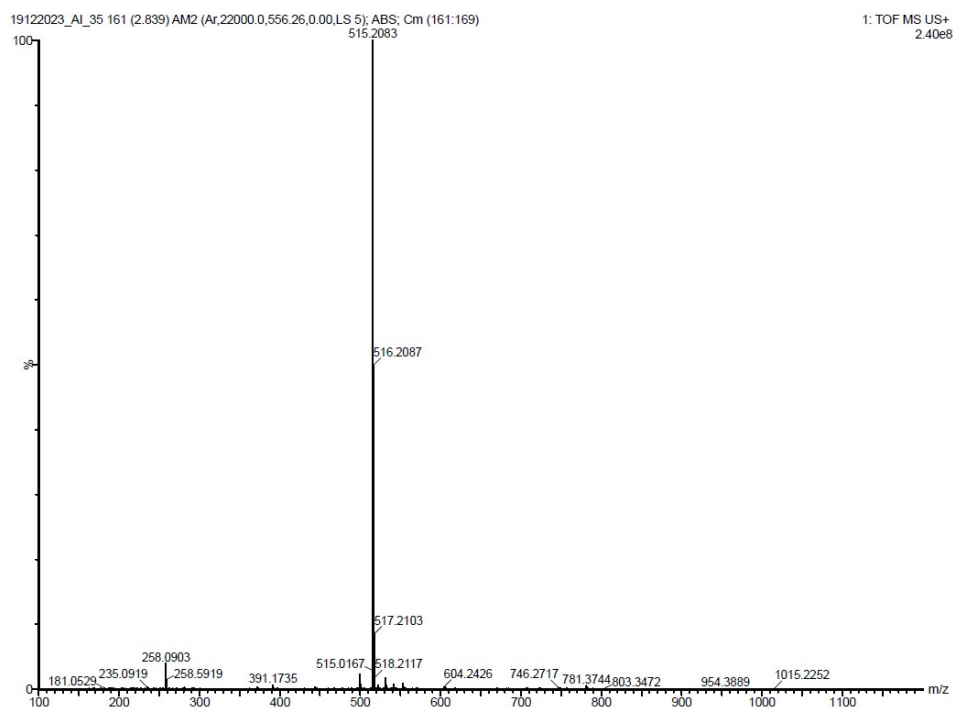

Figure S75. The HRMS spectra of compound **31**

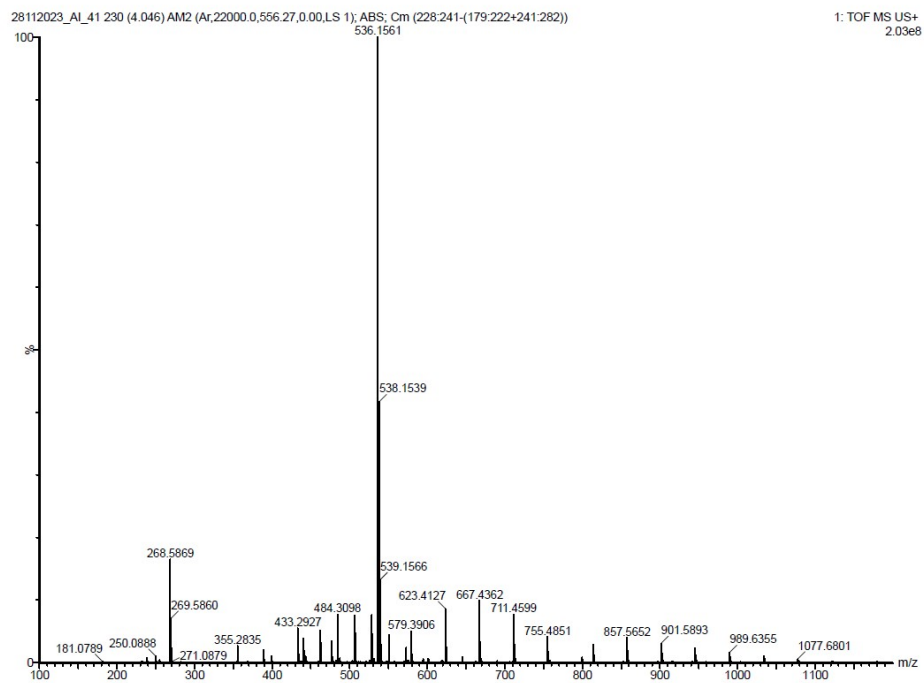

Figure S76. The HRMS spectra of compound **32**



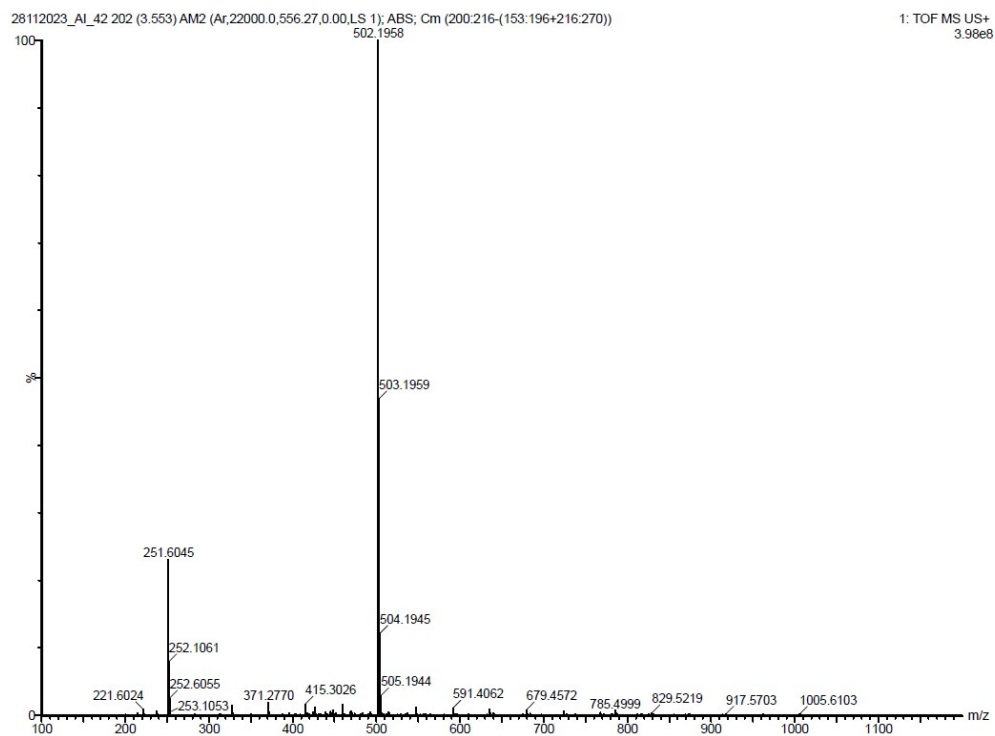

Figure S77. The HRMS spectra of compound **33**

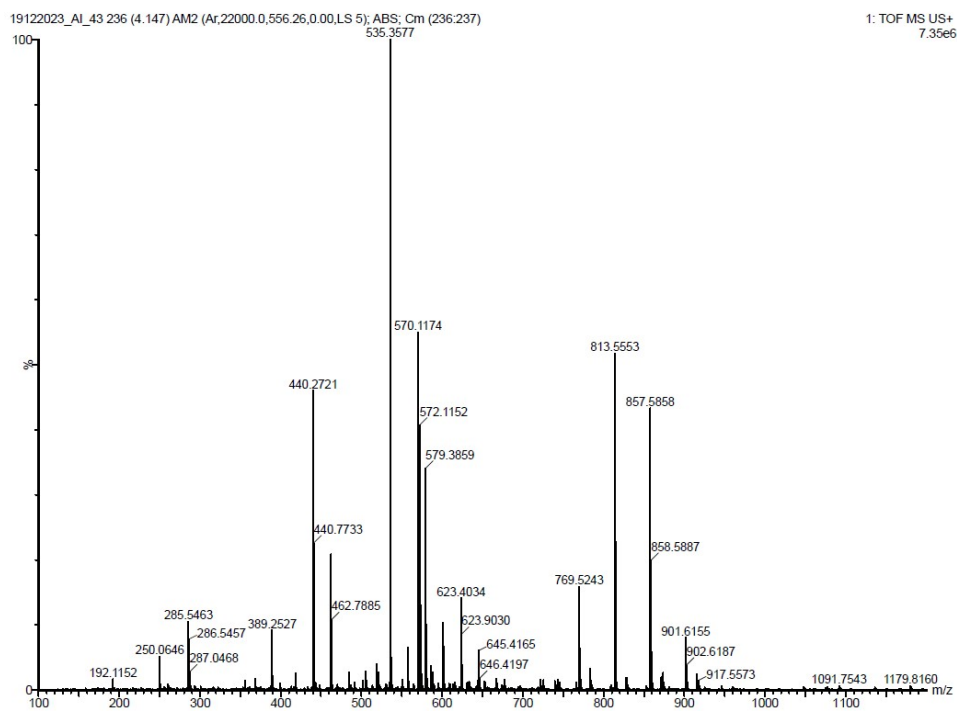

Figure S78. The HRMS spectra of compound **34**

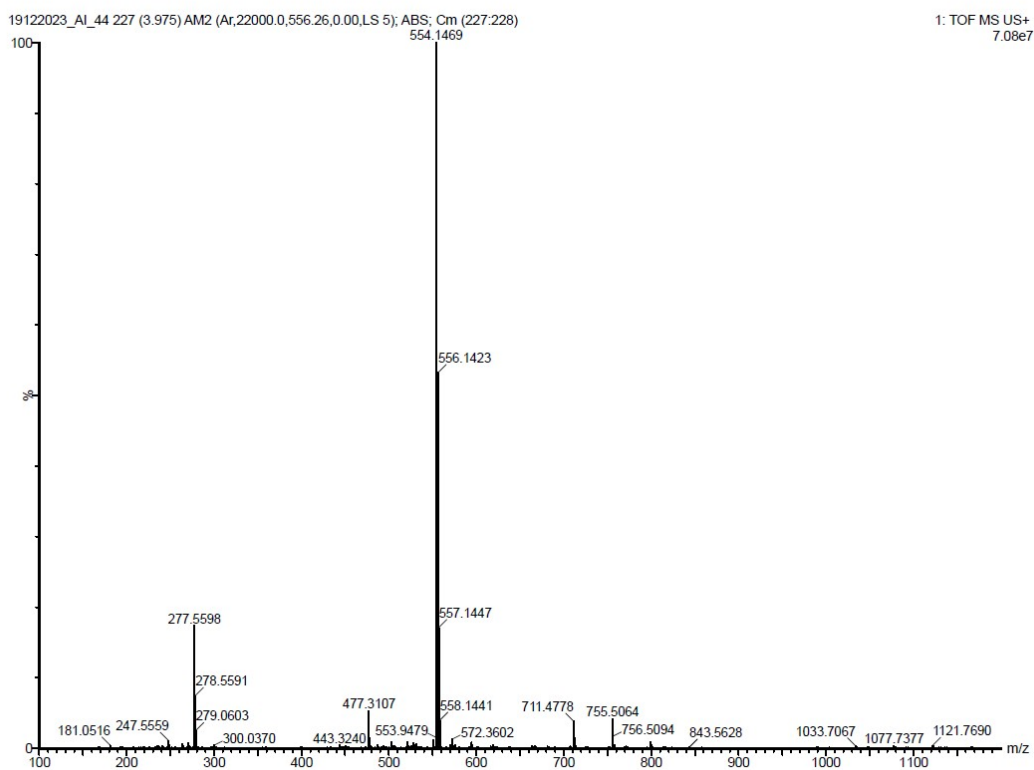

Figure S79. The HRMS spectra of compound **35**

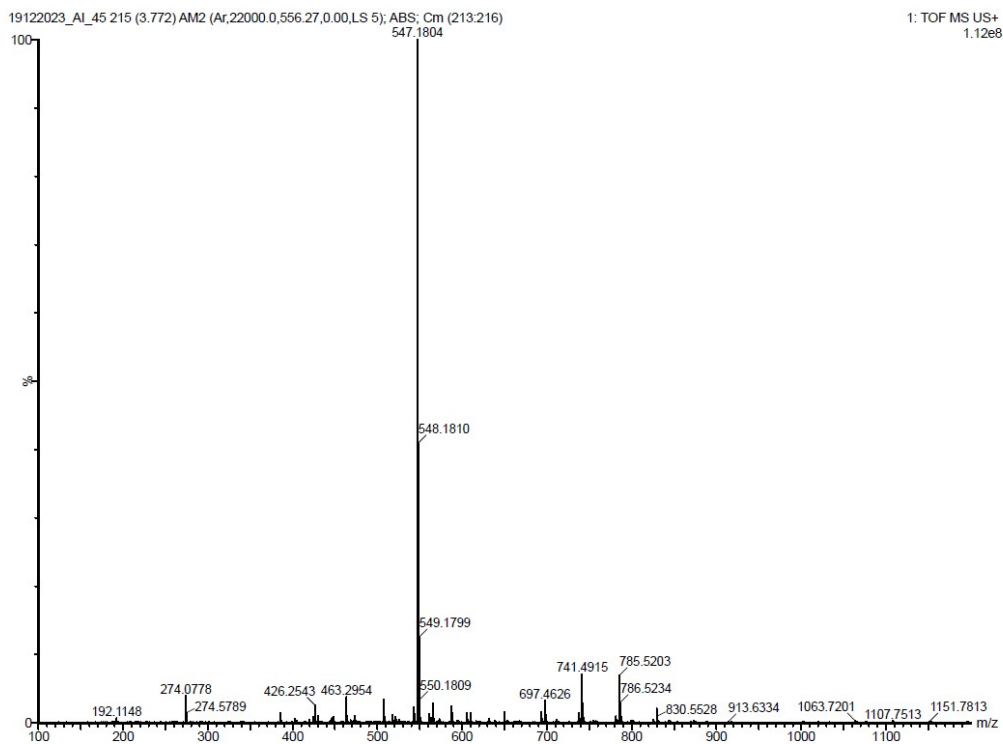

Figure S80. The HRMS spectra of compound **36**

## 5. NMR spectra of compounds (3-6 & 12-16)

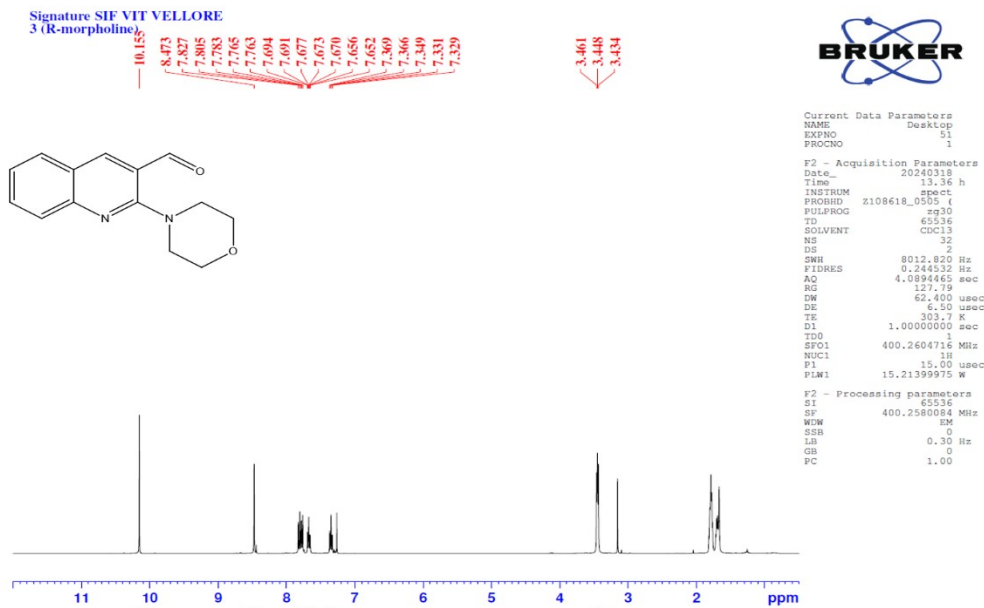

Figure S81. The <sup>1</sup>H NMR Spectrum of the compound 3

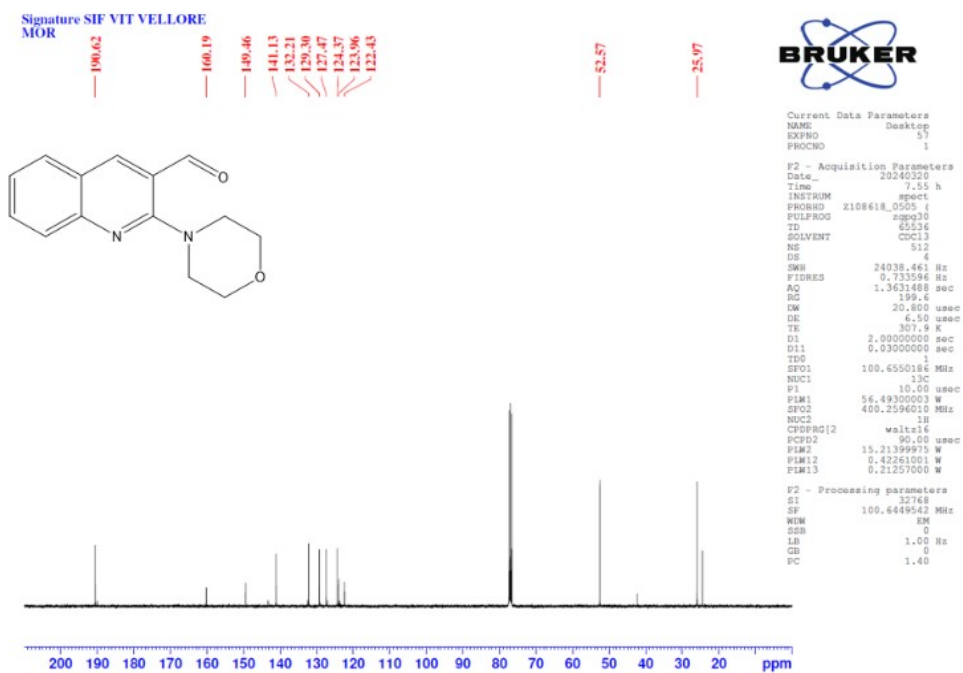

Figure S82. The <sup>13</sup>C NMR Spectrum of the compound 3

Signature SIF VIT VELLORE  
4

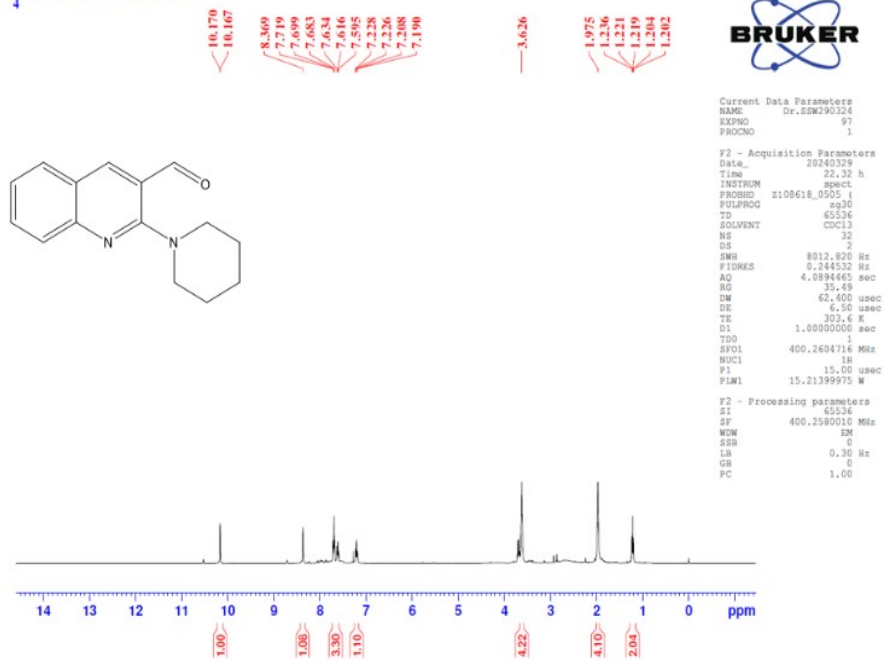

Figure S83. The <sup>1</sup>H NMR Spectrum of the compound 4

Signature SIF VIT VELLORE  
4-c13

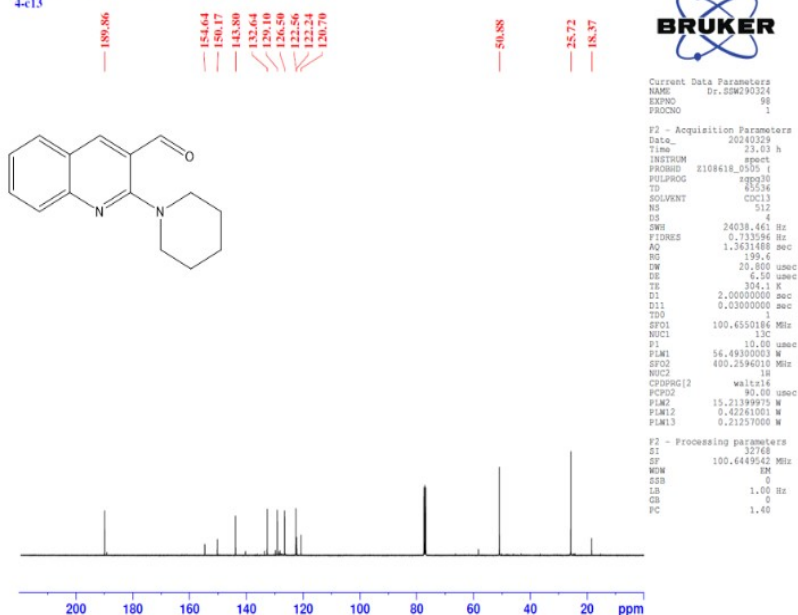

Figure S84. The <sup>13</sup>C NMR Spectrum of the compound 4

Signature SIF VIT VELLORE  
5

10.199  
8.305  
7.642  
7.638  
7.634  
7.621  
7.619  
7.615  
7.605  
7.589  
7.546  
7.542  
7.525  
7.521  
7.181  
7.157  
7.155  
7.138  
7.118

3.578  
3.561  
3.544

1.922  
1.913  
1.905  
1.898  
1.889

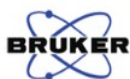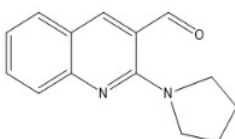

Current Data Parameters  
NAME Desktop  
EXPNO 75  
PROCNO 1

F2 - Acquisition Parameters  
Date\_ 20240325  
Time 3.47 h  
INSTRUM spect  
PROBHD z108618\_0505 (4  
PULPROG zg30  
TD 65536  
SOLVENT CDCl3  
NS 32  
DS 2  
SWH 8012.820 Hz  
FIDRES 0.244532 Hz  
AQ 4.0894445 sec  
RG 88.69  
DW 62.400 usec  
DE 6.50 usec  
TE 304.6 K  
D1 1.00000000 sec  
TDO 1  
SFO1 400.2604716 MHz  
NUC1 1H  
P1 15.00 usec  
PLW1 15.21399975 W

F2 - Processing parameters  
SI 65536  
SF 400.2580412 MHz  
WDW EM  
SSB 0  
LB 0.30 Hz  
GB 0  
PC 1.00

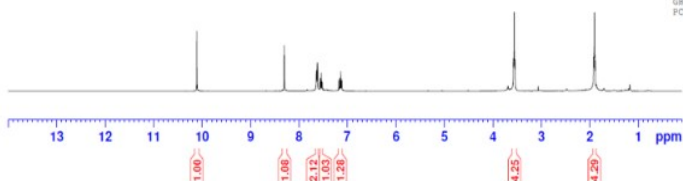

Signature SIF VIT VELLORE  
5-c13

189.85  
154.70  
150.24  
143.76  
132.63  
129.10  
126.60  
122.58  
120.74

50.90

25.75

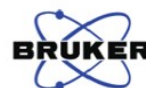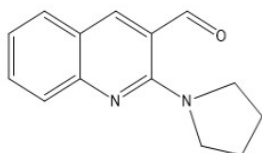

Current Data Parameters  
NAME Desktop  
EXPNO 78  
PROCNO 1

F2 - Acquisition Parameters  
Date\_ 20240325  
Time 4.18 h  
INSTRUM spect  
PROBHD z108618\_0505 (4  
PULPROG zgpg30  
TD 65536  
SOLVENT CDCl3  
NS 512  
DS 4  
SWH 24038.461 Hz  
FIDRES 0.733596 Hz  
AQ 1.3631488 sec  
RG 143.73  
DW 20.800 usec  
DE 6.50 usec  
TE 305.1 K  
D1 2.00000000 sec  
D11 0.03000000 sec  
TDO 1  
SFO1 100.6550186 MHz  
NUC1 13C  
P1 10.00 usec  
PLW1 56.49200003 W  
SFO2 400.2596010 MHz  
NUC2 1H  
CPDPRG2 waltz16  
PCPD2 90.00 usec  
PLW2 15.21399975 W  
PLW12 0.42261001 W  
PLW13 0.21257000 W

F2 - Processing parameters  
SI 52768  
SF 100.6449542 MHz  
WDW EM  
SSB 0  
LB 1.00 Hz  
GB 0  
PC 1.40

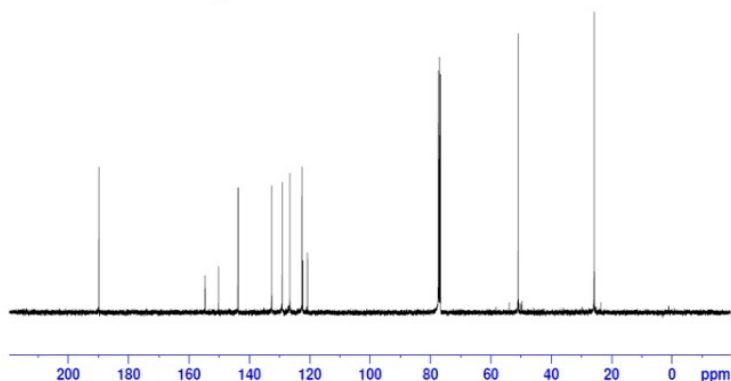

Figure S85. The <sup>1</sup>H NMR Spectrum of the compound **5**

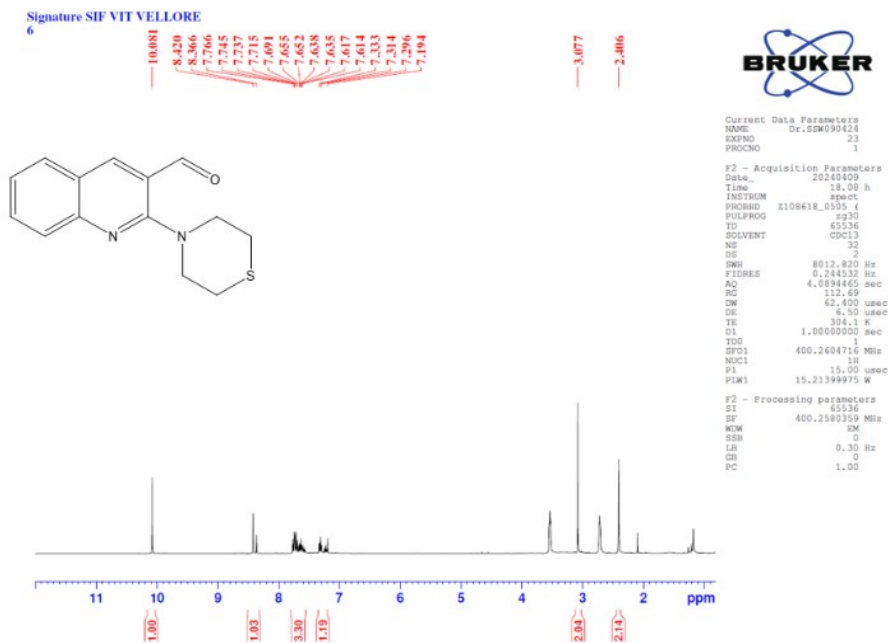

Figure S86. The  $^{13}\text{C}$  NMR Spectrum of the compound **5**

Figure S87. The  $^1\text{H}$  NMR Spectrum of the compound **6**

Figure S88. The  $^{13}\text{C}$  NMR Spectrum of the compound **6**

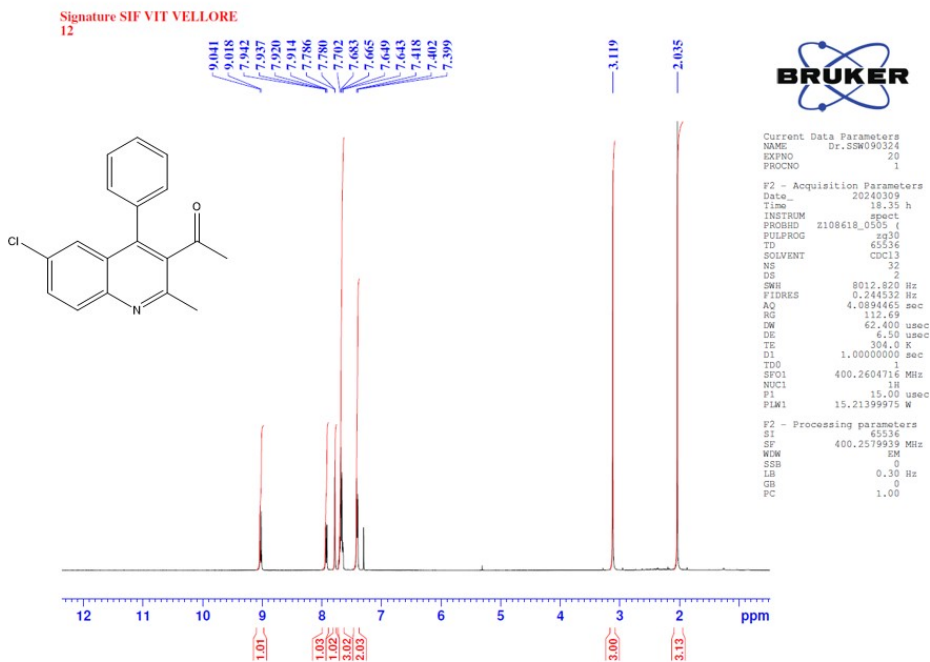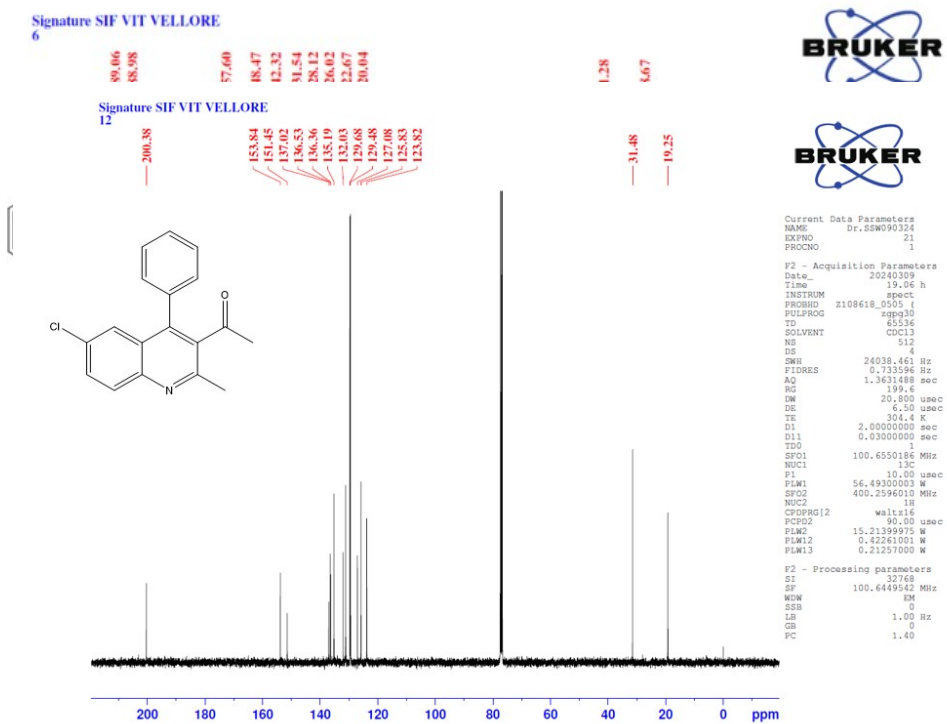

Figure S89. The  $^1\text{H}$  NMR Spectrum of the compound 12

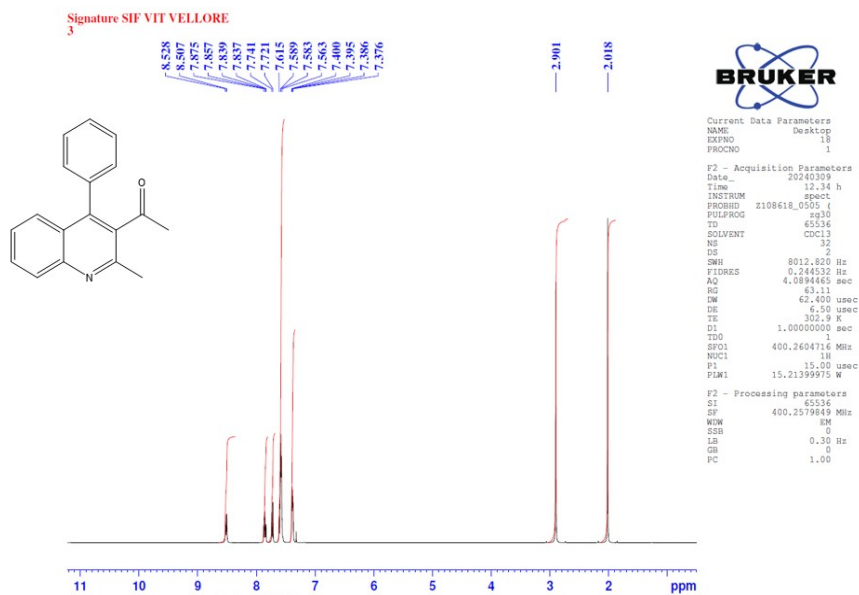

Figure S90. The  $^{13}\text{C}$  NMR Spectrum of the compound **12**

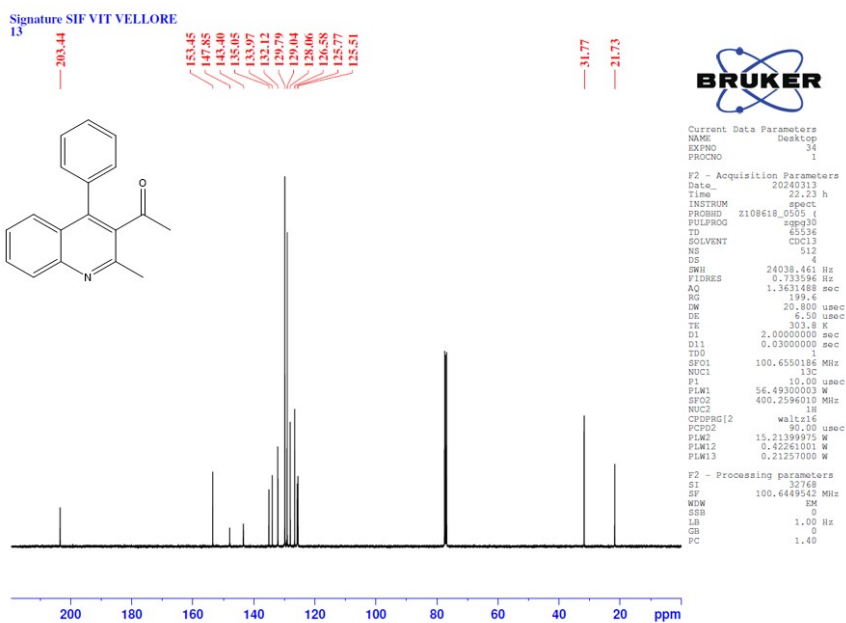

Figure S91. The  $^1\text{H}$  NMR Spectrum of the compound **13**

Figure S92. The  $^{13}\text{C}$  NMR Spectrum of the compound **13**



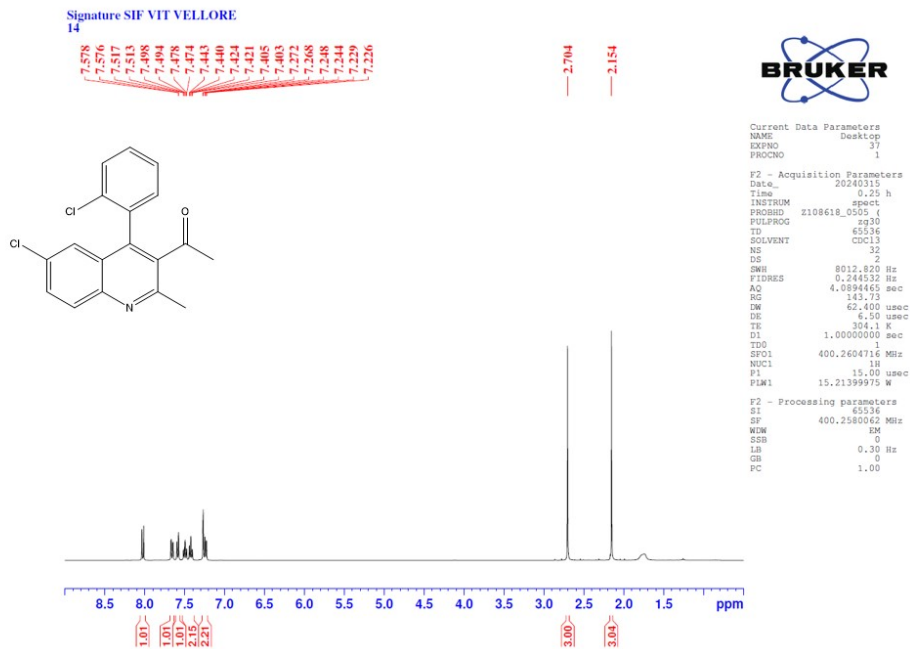

Figure S93. The  $^1\text{H}$  NMR Spectrum of the compound **14**

Figure S94. The  $^{13}\text{C}$  NMR Spectrum of the compound **14**

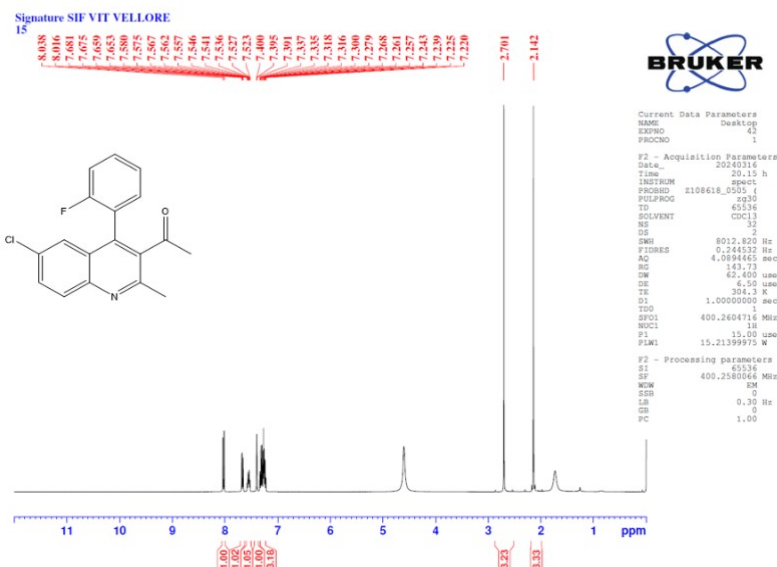

Figure S95. The  $^1\text{H}$  NMR Spectrum of the compound **15**

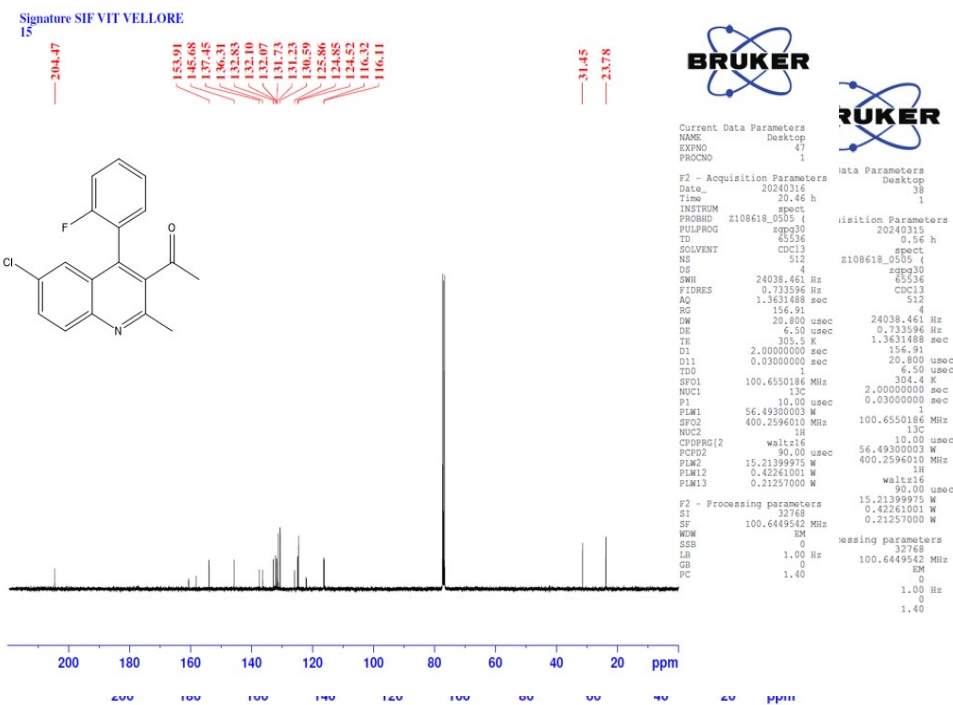

Figure S96. The  $^{13}\text{C}$  NMR Spectrum of the compound **15**

Signature SIF VIT VELLORE  
16

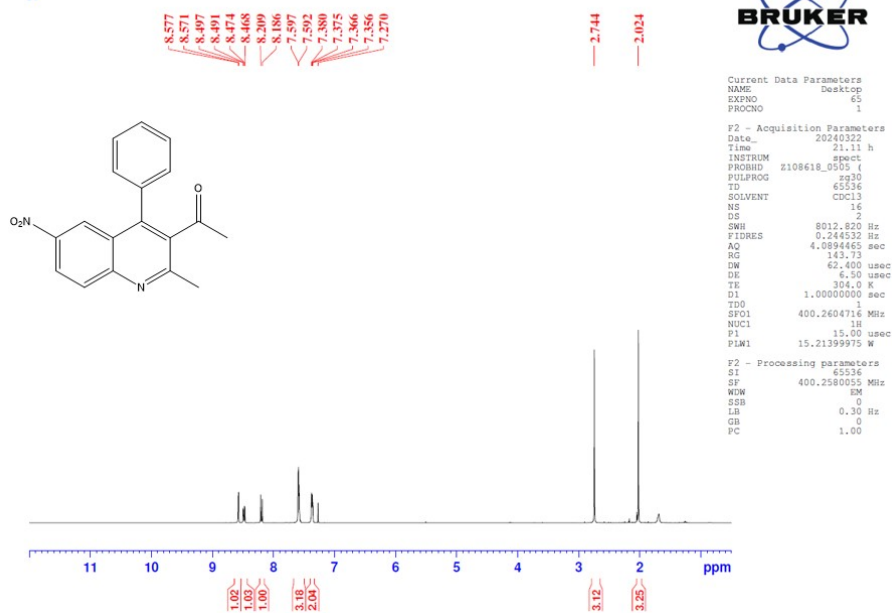

Figure S97. The  $^1\text{H}$  NMR Spectrum of the compound **16**

Figure S98. The  $^{13}\text{C}$  NMR Spectrum of the compound **16**

## 5. SOLVATOCHROMISM OF THE COMPOUNDS 17-36

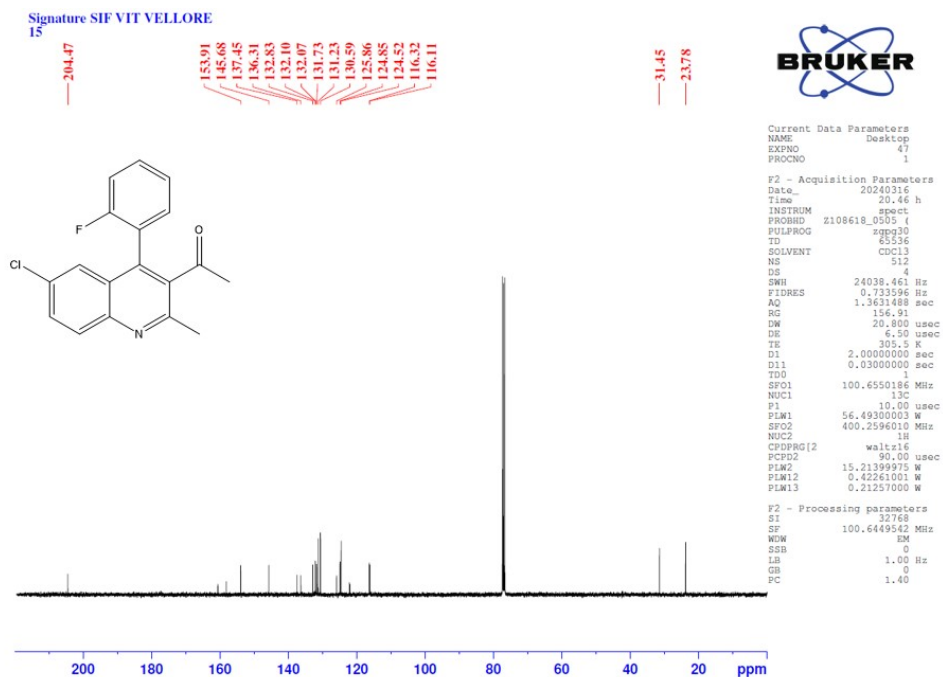



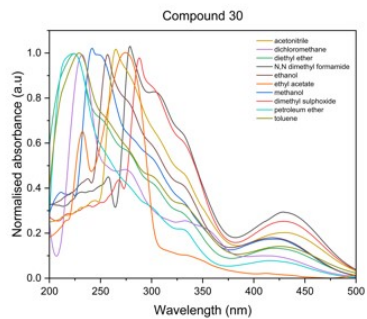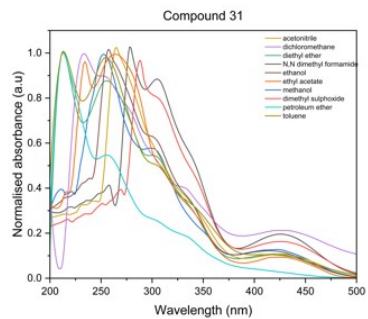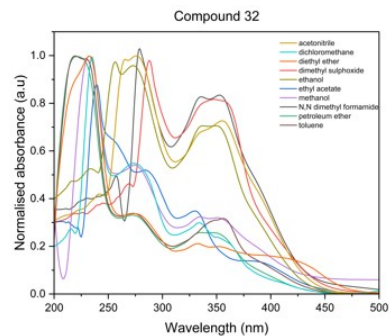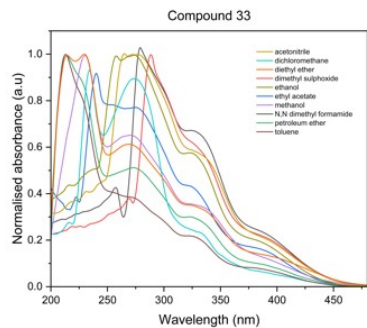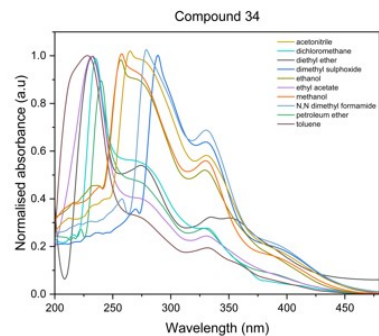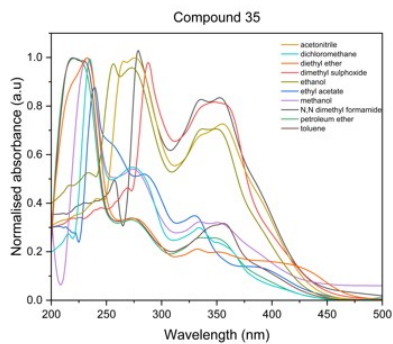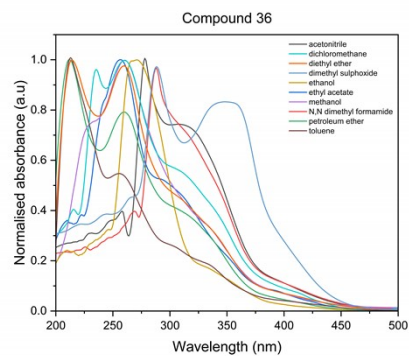

## 6. THE OPTIMISED GEOMETRY OF THE COMPOUNDS 17-36

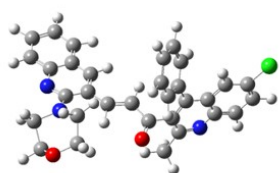

17

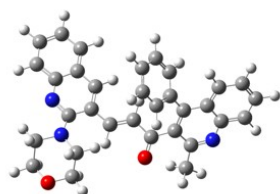

18

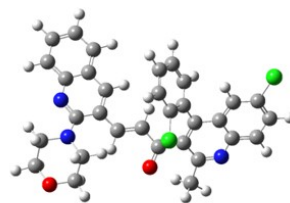

19

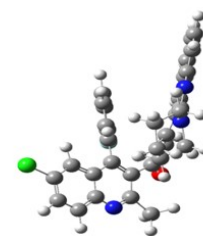

20

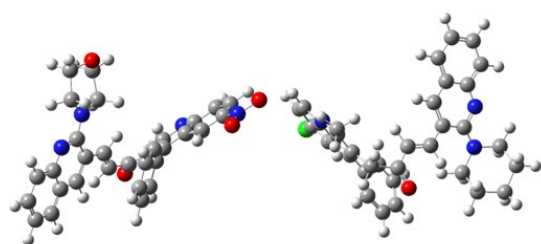

21

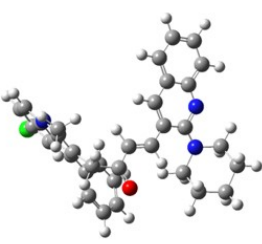

22

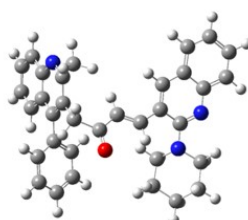

23

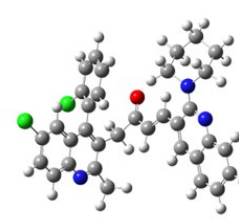

24

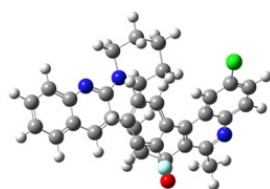

25

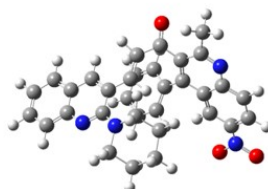

26

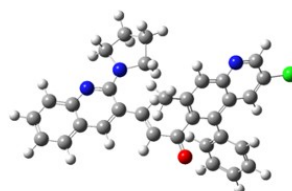

27

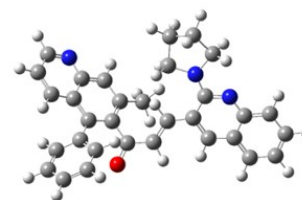

28

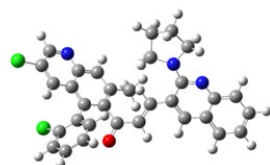

29

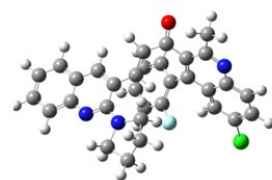

30

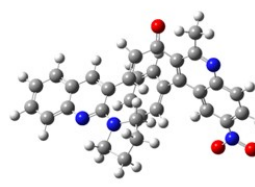

31

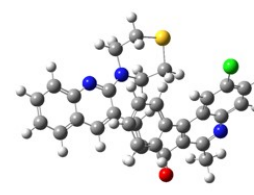

32

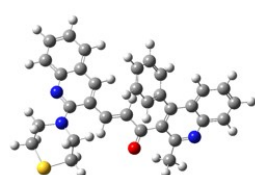

33

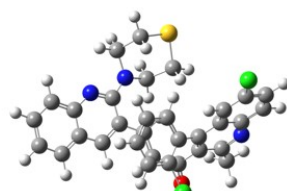

34

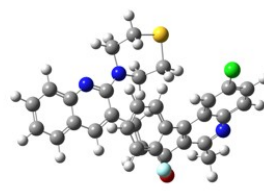

35

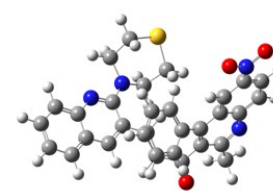

36

## 7. FRONTIER MOLECULAR ORBITALS OF THE COMPOUNDS 17-36

Lowest  
Unoccupied  
Molecular  
Orbital  
(LUMO)

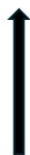

Highest  
Unoccupied  
Molecular  
Orbital  
(HOMO)

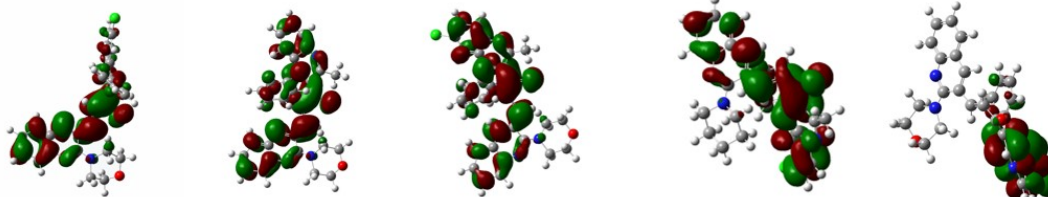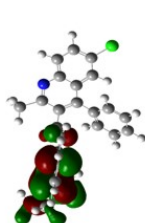

17  
 $\Delta E = 3.05397$

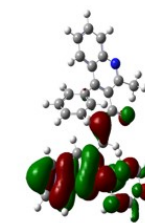

18  
 $\Delta E = 3.03480$

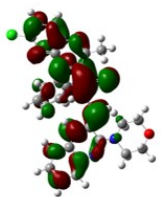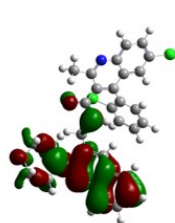

19  
 $\Delta E = 2.92356$

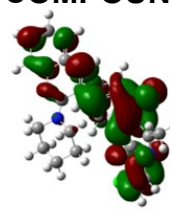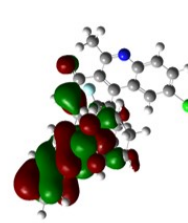

20  
 $\Delta E = 3.11580$

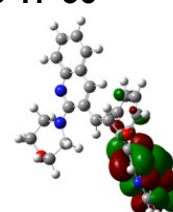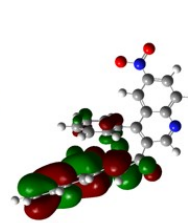

21  
 $\Delta E = 3.18114$

Lowest  
Unoccupied  
Molecular  
Orbital  
(LUMO)

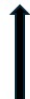

Highest  
Unoccupied  
Molecular  
Orbital  
(HOMO)

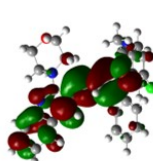

22  
 $\Delta E = 3.20274$

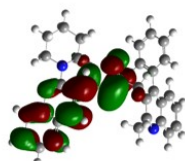

23  
 $\Delta E = 3.22515$

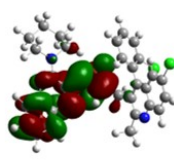

24  
 $\Delta E = 3.21462$

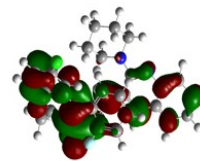

25  
 $\Delta E = 3.11580$

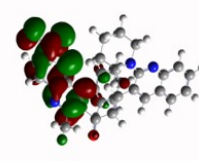

26  
 $\Delta E = 2.15514$

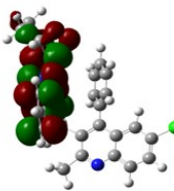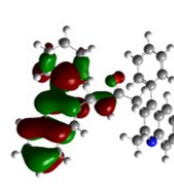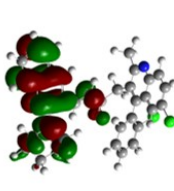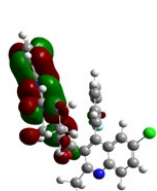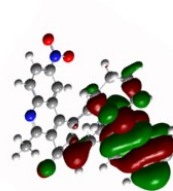



Lowest Unoccupied Molecular Orbital (LUMO)

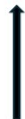

Highest Unoccupied Molecular Orbital (HOMO)

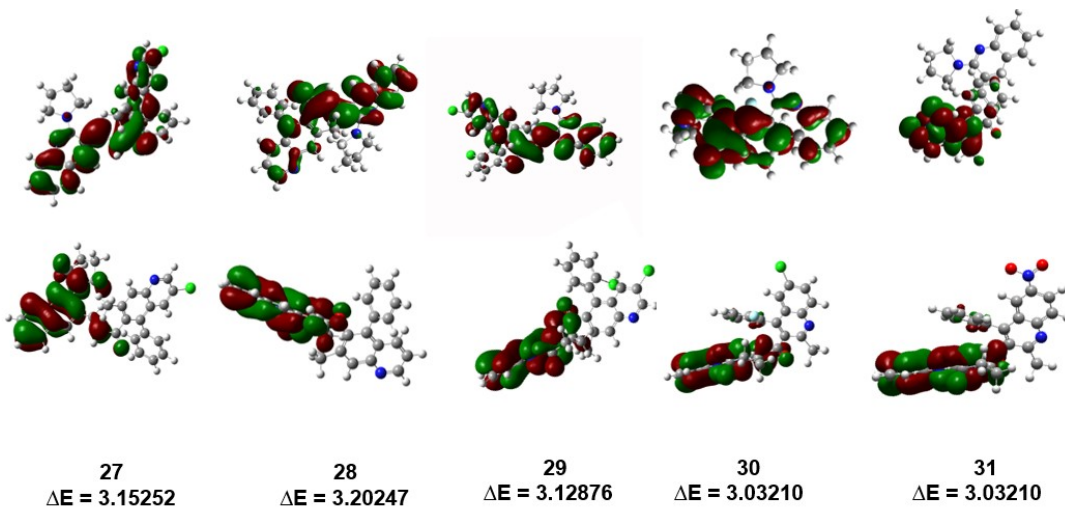

Lowest Unoccupied Molecular Orbital (LUMO)

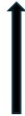

Highest Unoccupied Molecular Orbital (HOMO)

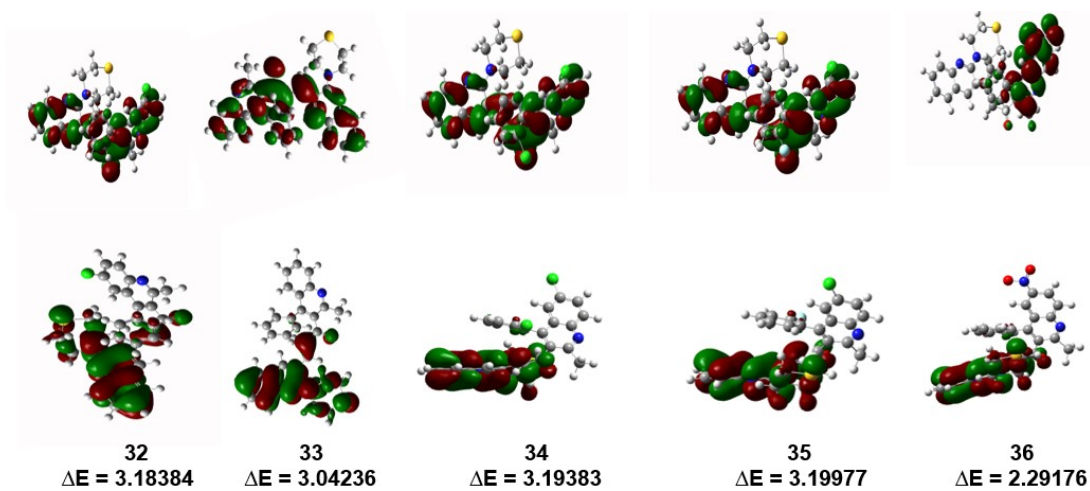

Supplement: d4ra04335a1.pdf [file d4ra04335a1.pdf]
